1 **Intergenerational adaptations to stress are evolutionarily conserved, stress-**  
2 **specific, and have deleterious trade-offs**

3

4 Nicholas O. Burton<sup>1,2,#</sup>, Alexandra Willis<sup>3</sup>, Kinsey Fisher<sup>4</sup>, Fabian Braukmann<sup>2</sup>, Jon Price<sup>2</sup>,  
5 Lewis Stevens<sup>5,6</sup>, L. Ryan Baugh<sup>4</sup>, Aaron Reinke<sup>3</sup>, and Eric A. Miska<sup>2,6,7</sup>

6

7 <sup>1</sup>Centre for Trophoblast Research, Department of Physiology, Development and Neuroscience,  
8 University of Cambridge, Cambridge, CB2 3EG, UK

9 <sup>2</sup>Gurdon Institute, University of Cambridge, Cambridge, CB2 1QN, UK

10 <sup>3</sup>Department of Molecular Genetics, University of Toronto, Toronto, ON, M5G 1M1, Canada

11 <sup>4</sup>Department of Biology, Duke University, Durham, NC, 27708, USA

12 <sup>5</sup>Department of Molecular Biosciences, Northwestern University, Evanston, IL, USA

13 <sup>6</sup>Wellcome Sanger Institute, Wellcome Genome Campus, Cambridge CB10 1SA, UK

14 <sup>7</sup>Department of Genetics, University of Cambridge, Downing Street, Cambridge CB2 3EH, UK

15

16

17 #Correspondence: [nob20@cam.ac.uk](mailto:nob20@cam.ac.uk)

18

19

20

21

22

23 **Keywords**

24 Intergenerational, phenotypic plasticity, *Caenorhabditis*, *P. vranovensis*, *N. parisii*, nutrient  
25 stress, infection, osmotic stress, *rhy-1*

26

27

28

29

## 30 **Abstract**

31 Despite reports of parental exposure to stress promoting physiological adaptations in progeny in  
32 diverse organisms, there remains considerable debate over the significance and evolutionary  
33 conservation of such multigenerational effects. Here, we investigate four independent models of  
34 intergenerational adaptations to stress in *C. elegans* – bacterial infection, eukaryotic infection,  
35 osmotic stress and nutrient stress – across multiple species. We found that all four  
36 intergenerational physiological adaptations are conserved in at least one other species, that they  
37 are stress-specific, and that they have deleterious trade-offs in mismatched environments. By  
38 profiling the effects of parental bacterial infection and osmotic stress exposure on progeny gene  
39 expression across species we established a core set of 279 highly conserved genes that exhibited  
40 intergenerational changes in expression in response to stress in all species tested and provide  
41 evidence suggesting that presumed adaptive and deleterious intergenerational effects are  
42 molecularly related at the gene expression level. By contrast, we found that these same stresses  
43 did not elicit any similarly conserved transgenerational changes in progeny gene expression three  
44 generations after stress exposure. We conclude that intergenerational responses to stress play a  
45 substantial and evolutionarily conserved role in regulating animal physiology and that the vast  
46 majority of the effects of parental stress on progeny gene expression are reversible and not  
47 maintained transgenerationally.

48

49

50

51

## 52 **Introduction**

53 Multigenerational effects of a parent's environment on progeny have been reported to contribute  
54 to numerous organismal phenotypes and pathologies in species ranging from plants to mammals  
55 (Agrawal et al., 1999; Bozler et al., 2019; Burton et al., 2020, 2017; Dantzer et al., 2013; Dias  
56 and Ressler, 2014; Hibshman et al., 2016; Hourri-Zeevi et al., 2020; Jordan et al., 2019; Kaletsky  
57 et al., 2020; Kishimoto et al., 2017; Klosin et al., 2017; Luna et al., 2012; Ma et al., 2019; Moore  
58 et al., 2019; Öst et al., 2014; Palominos et al., 2017; Posner et al., 2019; Veenendaal et al., 2013;  
59 Vellichirammal et al., 2017; Webster et al., 2018; Wibowo et al., 2016; Willis et al., 2021).

60 These effects on progeny include many notable observations of intergenerational (lasting 1-2  
61 generations) adaptive changes in phenotypically plastic traits such as the development of wings  
62 in pea aphids (Vellichirammal et al., 2017), helmet formation in *Daphnia* (Agrawal et al., 1999),  
63 accelerated growth rate in red squirrels (Dantzer et al., 2013), and physiological adaptations to  
64 osmotic stress and pathogen infection in both *Arabidopsis* (Luna et al., 2012; Wibowo et al.,  
65 2016) and *Caenorhabditis elegans* (Burton et al., 2020, 2017). These intergenerational adaptive  
66 changes in development and physiology can lead to substantial increases in organismal survival,  
67 with up to 50-fold increases in the survival of offspring from stressed parents being reported  
68 when compared to the offspring from naïve parents (Burton et al., 2020). While many of the  
69 most studied intergenerational effects of a parent's environment on offspring have been  
70 identified in plants and invertebrates, intergenerational effects have also been reported in  
71 mammals (Dantzer et al., 2013; Dias and Ressler, 2014). Similar to findings in plants and  
72 invertebrates, some observations of intergenerational effects in mammals have been found to be  
73 physiologically adaptive (Dantzer et al., 2013), but many others, such as observations of fetal  
74 programming in humans (de Gusmão Correia et al., 2012; Langley-Evans, 2006; Schulz, 2010)  
75 and studies of the Dutch Hunger Winter (Veenendaal et al., 2013), have been reported to be

76 deleterious. Nonetheless, even for these presumed deleterious intergenerational effects it has  
77 been hypothesized that under different conditions the intergenerational effects of fetal  
78 programming, such as the effects caused by the Dutch Hunger Winter, might be considered  
79 physiologically adaptive (Hales and Barker, 2001, 1992).

80  
81 If intergenerational responses to environmental stresses represent evolutionarily conserved  
82 processes, if they are general or stress-specific effects, and whether adaptive and deleterious  
83 intergenerational effects are molecularly related remains unknown. Furthermore, multiple  
84 different studies have recently reported that some environmental stresses elicit changes in  
85 progeny physiology and gene expression that persist for three or more generations, also known  
86 as transgenerational effects (Kaletsky et al., 2020; Klosin et al., 2017; Ma et al., 2019; Moore et  
87 al., 2019; Posner et al., 2019; Webster et al., 2018). However, if intergenerational effects (lasting  
88 1-2 generations) and transgenerational effects (lasting 3+ generations) represent related or  
89 largely separable phenomena remains unclear. Answering these questions is critically important  
90 not only in understanding the role that multigenerational effects play in evolution, but also in  
91 understanding how such effects might contribute to multiple human pathologies that have been  
92 linked to the effects of a parent's environment on offspring, such as Type 2 diabetes and  
93 cardiovascular disease (Langley-Evans, 2006).

94  
95 Here, we investigated the evolutionary conservation, stress specificity, and potential tradeoffs of  
96 four independent models of intergenerational adaptations to stress in *C. elegans* – bacterial  
97 infection, eukaryotic infection, nutrient stress and osmotic stress. We found that all four models  
98 of intergenerational adaptive effects are conserved in at least one other species, but that all

99 exhibited a different pattern of evolutionary conservation. Each intergenerational adaptive effect  
100 was stress-specific and multiple intergenerational adaptive effects exhibited deleterious tradeoffs  
101 in mismatched environments or environments where multiple stresses were present  
102 simultaneously. By profiling the effects of multiple different stresses on offspring gene  
103 expression across species we identified a set of 279 genes that exhibited intergenerational  
104 changes in gene expression in response to stress in all species tested. In addition, we found that  
105 an inversion in the expression of a subset of these genes, from increased expression to decreased  
106 expression in the offspring of stressed parents, correlates with an inversion of an adaptive  
107 intergenerational response to bacterial infection in *C. elegans* and *C. kamaaina* to a deleterious  
108 intergenerational effect in *C. briggsae*. Lastly, we report that the vast majority of the  
109 intergenerational effects of multiple different stresses on offspring gene expression were not  
110 maintained transgenerationally in F3 progeny and that no transgenerational changes in gene  
111 expression that were observed in *C. elegans* were conserved in in a second *Caenorhabditis*  
112 species that exhibits phenotypically conserved intergenerational responses to stress  
113 (*C. kamaaina*). Our findings demonstrate that intergenerational adaptive responses to stress are  
114 evolutionarily conserved, stress-specific, and likely represent a distinct phenomenon from  
115 transgenerational effects. In addition, our findings suggest that the mechanisms that mediate  
116 intergenerational adaptive responses in some species might be related to the mechanisms that  
117 mediate intergenerational deleterious effects in other species.

118

## 119 **Results**

120

### 121 **Intergenerational adaptations to stress are evolutionarily conserved**

122

123 To test if any of the intergenerational adaptations to stress that have been reported in *C. elegans*  
124 are evolutionarily conserved in other species we focused on four recently described  
125 intergenerational adaptations to abiotic and biotic stresses - osmotic stress (Burton et al., 2017),  
126 nutrient stress (Hibshman et al., 2016; Jordan et al., 2019), *Pseudomonas vranovensis* infection  
127 (bacterial) (Burton et al., 2020), and *Nematocida parisii* infection (eukaryotic – microsporidia)  
128 (Willis et al., 2021). We tested if these four intergenerational adaptive responses were conserved  
129 in four different species of *Caenorhabditis* (*C. briggsae*, *C. elegans*, *C. kamaaina*, and  
130 *C. tropicalis*) that shared a last common ancestor approximately 30 million years ago (Figure  
131 1A) (Cutter, 2008). These species were chosen because they represent multiple independent  
132 branches of the *Elegans* group (Figure 1A) and because we could probe the conservation of  
133 underlying mechanisms using established genetics approaches.

134

135 We exposed parents of all four species to *P. vranovensis* and subsequently studied their  
136 offspring's survival rate in response to future *P. vranovensis* exposure. We found that parental  
137 exposure to the bacterial pathogen *P. vranovensis* protected offspring from future infection in  
138 both *C. elegans* and *C. kamaaina* (Figure 1B) and that this adaptive intergenerational effect in *C.*  
139 *kamaaina* required the same stress response genes (*cysl-1* and *rhy-1*) as previously reported for  
140 *C. elegans* (Burton et al., 2020) (Figure 1C), indicating that these animals intergenerationally  
141 adapt to infection via a similar and potentially conserved mechanism. By contrast, we found that  
142 naïve *C. briggsae* animals were more resistant to *P. vranovensis* than any of the other species  
143 tested, but exposure of *C. briggsae* parents to *P. vranovensis* caused greater than 99% of  
144 offspring to die upon future exposure to *P. vranovensis* (Figure 1B). We confirmed that parental

145 *P. vranovensis* exposure resulted in an adaptive intergenerational effect for *C. elegans* but a  
146 deleterious intergenerational effect for *C. briggsae* by testing multiple additional wild isolates of  
147 both species (Supplemental Figure 1A-C). Parental exposure to *P. vranovensis* had no  
148 observable effect on offspring response to infection in *C. tropicalis* (Figure 1B). We conclude  
149 that parental exposure to *P. vranovensis* causes substantial changes in offspring susceptibility to  
150 future *P. vranovensis* exposure in multiple species, but whether those effects are protective or  
151 deleterious for offspring is species dependent.

152  
153 Using a similar approach to investigate intergenerational adaptive responses to other stresses, we  
154 found that parental exposure to mild osmotic stress protected offspring from future osmotic  
155 stress in all of *C. elegans*, *C. briggsae*, and *C. kamaaina*, but again not in *C. tropicalis* (Figure  
156 1D). This intergenerational adaptation to osmotic stress in *C. briggsae* and *C. kamaaina* required  
157 the glycerol-3-phosphate dehydrogenase *gpdh-2* (Figure 1E and Supplemental Figure 1D),  
158 similar to previous observations for *C. elegans* (Burton et al., 2017) and indicating that these  
159 adaptations are regulated by similar and likely evolutionarily conserved mechanisms.

160  
161 We then sought to test if intergenerational resistance to infection by the eukaryotic pathogen  
162 *N. parisii* is similarly conserved in *Caenorhabditis* species. *N. parisii* is a common natural  
163 pathogen of both *C. elegans* and *C. briggsae* (Zhang et al., 2016). Here, we show that *N. parisii*  
164 can also infect *C. kamaaina* and *C. tropicalis* (Supplemental Figure 2). By investigating the  
165 effects of parental *N. parisii* infection on offspring across species, we found that parental  
166 exposure of *C. elegans* and *C. briggsae* to *N. parisii* protected offspring from future infection

167 (Figure 1F). By contrast, parental exposure of *C. kamaaina* and *C. tropicalis* to *N. parisii* had no  
168 observable effect on offspring infection rate (Figure 1F).

169

170 Lastly, we investigated the intergenerational effects of nutrient stress on offspring. We found that  
171 parental nutrient stress by food deprivation resulted in larger offspring in both *C. elegans* and  
172 *C. tropicalis*, which is predicted to be adaptive (Hibshman et al., 2016), but had minimal effects  
173 on offspring size in *C. briggsae* and *C. kamaaina* (Figure. 1G). Collectively, our findings  
174 indicate that all four reported intergenerational adaptive effects in *C. elegans* are conserved in at  
175 least one other species but all four show a different pattern of conservation, which is consistent  
176 with each response being regulated by distinct molecular mechanisms (Burton et al., 2020, 2017;  
177 Hibshman et al., 2016; Jordan et al., 2019; Willis et al., 2021).



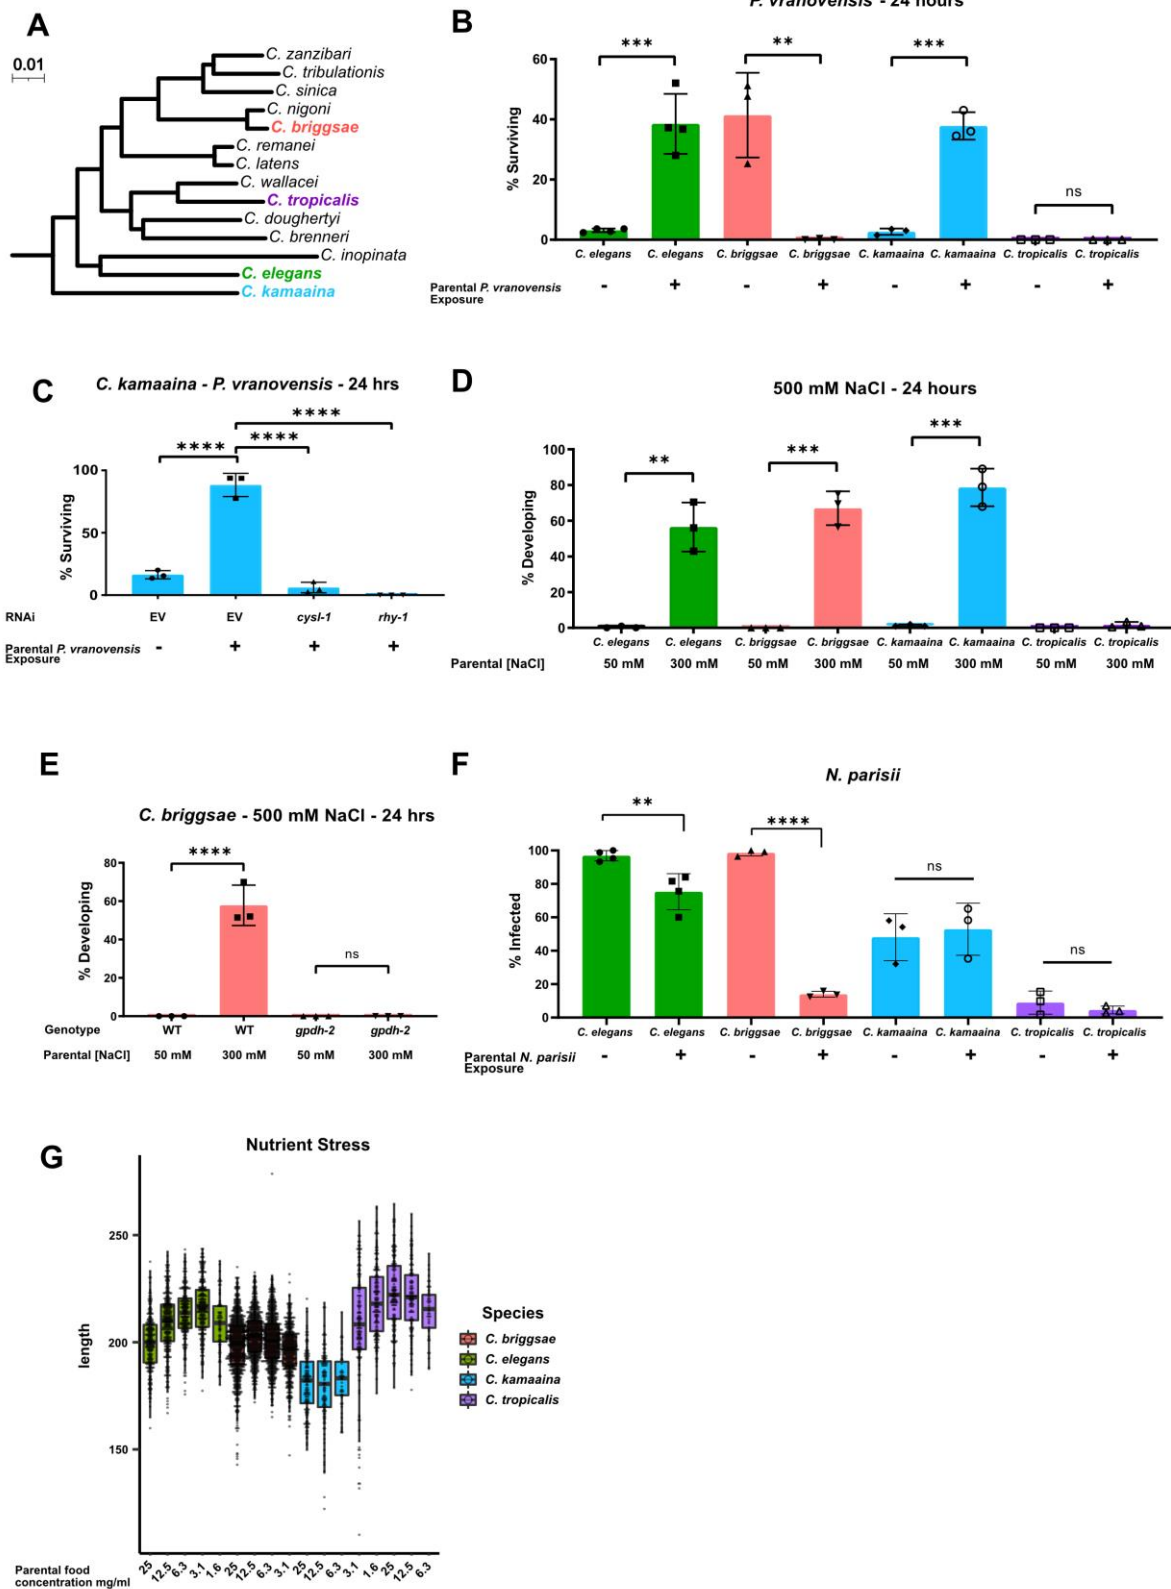

Figure 1. Intergenerational adaptations to multiple stresses are evolutionarily conserved in multiple species of *Caenorhabditis*. (A) Phylogenetic tree of the *Elegans* group of *Caenorhabditis* species adapted from Stevens et al., 2020. Scale represents substitutions per site. (B) Percent of wild-type *C. elegans* (N2), *C. kamaaina* (QG122), *C. briggsae* (AF16), and *C. tropicalis* (JU1373) animals surviving after 24 hours on plates seeded with *P. vranovensis* BIGb0446. Data presented as mean values  $\pm$  s.d.  $n = 3-4$  experiments of  $>100$  animals. (C) Percent of *C. kamaaina* wild-type (QG122) animals surviving after 24 hours of exposure to *P. vranovensis*. Data presented as mean values  $\pm$  s.d.  $n = 3$  experiments of  $>100$  animals. (D) Percent of wild-type animals mobile and developing at 500 mM NaCl after 24 hours. Data presented as mean values  $\pm$  s.d.  $n = 3$  experiments of  $>100$  animals. (E) Percent of wild-type and *Cbr-gpdh-2(syb2973)* mutant *C. briggsae* (AF16) mobile and developing after 24 hours at 500 mM NaCl. Data presented as mean values  $\pm$  s.d.  $n = 3$  experiments of  $>100$  animals. (F) Percent of animals exhibiting detectable infection by *N. parisii* as determined by DY96 staining after 72 h for *C. elegans* and *C. briggsae*, or 96 h for *C. kamaaina* and *C. tropicalis*. Data presented as mean values  $\pm$  s.e.m.  $n = 3-4$  experiments of 83-202 animals. (G) Boxplots for length of L1 progeny from P0 parents that were subject to the HB101 dose series. Larvae were measured using Wormsizer. Boxplots show median length with four quartiles.  $n = 3-8$  experiments of 50-200 animals. \*\* $p < 0.01$ , \*\*\*  $p < 0.0001$ , \*\*\*\*  $p < 0.0001$

179

180 **The effects of parental bacterial infection on offspring gene expression correlate with**  
181 **offspring pathogen sensitivity**

182

183 Of the four intergenerational models investigated here, parental exposure of *C. elegans* to

184 osmotic stress and *P. vranovensis* infection were previously reported to cause substantial

185 changes in offspring gene expression, including the expression of genes that are required for the

186 observed intergenerational adaptations (Burton et al., 2020, 2017). We exposed *C. elegans*,

187 *C. briggsae*, *C. kamaaina*, and *C. tropicalis* to osmotic stress and *P. vranovensis* infection and

188 subsequently performed RNA-seq on offspring to test: (1) if the specific heritable changes in

189 gene expression in response to each of these stresses are conserved across species and (2) if any

190 changes in gene expression correlate with the phenotypic differences in intergenerational

191 responses to stress we observed in the different species. This analysis allowed us to compare the

192 effects of parental stress on offspring gene expression of 7,587 single-copy orthologues that are  
193 conserved across all four species (Supplemental Table 1).

194

195 Consistent with previous observations in *C. elegans*, we found that parental exposure to  
196 *P. vranovensis* resulted in substantial changes in offspring gene expression in all four species we  
197 investigated (Figure 2A-D and Supplemental Table 2). Of the 7,587 single copy orthologues  
198 shared between the four species, we found 2,663 genes that exhibited differential expression in  
199 the offspring of infected animals in *C. elegans* and at least one other species (Figure 2D and  
200 Supplemental Table 2). Furthermore, we found that 275 genes are differentially expressed in the  
201 offspring of parents exposed to *P. vranovensis* in all four species (Figure 2D and Supplemental  
202 Table 2). These data indicate that parental exposure to the bacterial pathogen *P. vranovensis*  
203 leads to changes in offspring gene expression at a common set of stress response genes in diverse  
204 species of *Caenorhabditis*.

205

206 Parental exposure of *C. elegans* and *C. kamaaina* to *P. vranovensis* led to increased progeny  
207 resistance to future *P. vranovensis* exposure (Figure 1B). By contrast, parental exposure of  
208 *C. briggsae* to *P. vranovensis* led to increased offspring susceptibility to *P. vranovensis*  
209 (Figure 1B). We hypothesized that differences in the expression of genes previously reported to  
210 be required for adaptation to *P. vranovensis*, such as the acyltransferase *rhy-1*, might underlie  
211 these differences between species. We therefore investigated whether any genes exhibited  
212 specific changes in expression in *C. elegans* and *C. kamaaina* that were either absent or inverted  
213 in *C. briggsae*. We found that of the 3,397 genes that exhibited differential expression in the  
214 offspring of parents exposed to *P. vranovensis* in *C. elegans*, only 718 were also differentially

215 expressed in *C. kamaaina* (Supplemental Table 2). From this refined list of 718 genes, we found  
216 that 287 exhibited increased expression in both *C. elegans* and *C. kamaaina*. Of these 287 genes,  
217 66 were not differentially expressed in *C. briggsae* and 52 exhibited decreased expression in the  
218 offspring of *C. briggsae* parents exposed to *P. vranovensis* (Supplemental Table 2). Similarly,  
219 we identified 405 genes that exhibited decreased expression in both the offspring of *C. elegans*  
220 and *C. kamaaina* parents exposed to *P. vranovensis*. Of these genes, 303 were not differentially  
221 expressed in *C. briggsae* and 18 exhibited increased expression in the offspring of *C. briggsae*  
222 parents exposed to *P. vranovensis* (Supplemental Table 2). These results indicate that a majority  
223 of the genes that are differentially expressed in the offspring of both *C. elegans* and *C. kamaaina*  
224 either do not change in *C. briggsae* or change in the opposite direction.

225  
226 Three genes, *cysl-1*, *cysl-2* and *rhy-1*, were previously reported to be required for *C. elegans* to  
227 intergenerationally adapt to *P. vranovensis* (Burton et al., 2020). Here, we found that all three  
228 genes exhibit significantly increased expression in the offspring of infected parents in both  
229 *C. elegans* and *C. kamaaina*. By contrast, *rhy-1* exhibited a 4-fold decrease in expression in  
230 *C. briggsae* offspring from infected parents (Figure 2E). Similarly, we found that parental  
231 exposure of *C. briggsae* to *P. vranovensis* had either no effect or a substantially reduced effect  
232 on the expression of *cysl-1* and *cysl-2* in the offspring of infected parents when compared to *C.*  
233 *elegans* and *C. kamaaina* (Supplemental Table 2). Notably, the directional change of *rhy-1*  
234 expression in progeny of animals exposed to *P. vranovensis* correlates with the observation that  
235 parental exposure to *P. vranovensis* results in enhanced pathogen resistance in offspring in  
236 *C. elegans* and *C. kamaaina* but has a strong deleterious effect on pathogen resistance in  
237 *C. briggsae* (Figure 1B). These findings suggest that molecular mechanisms underlying adaptive

238 and deleterious effects in different species might be related and dependent on the direction of  
239 changes in gene expression of specific stress response genes.

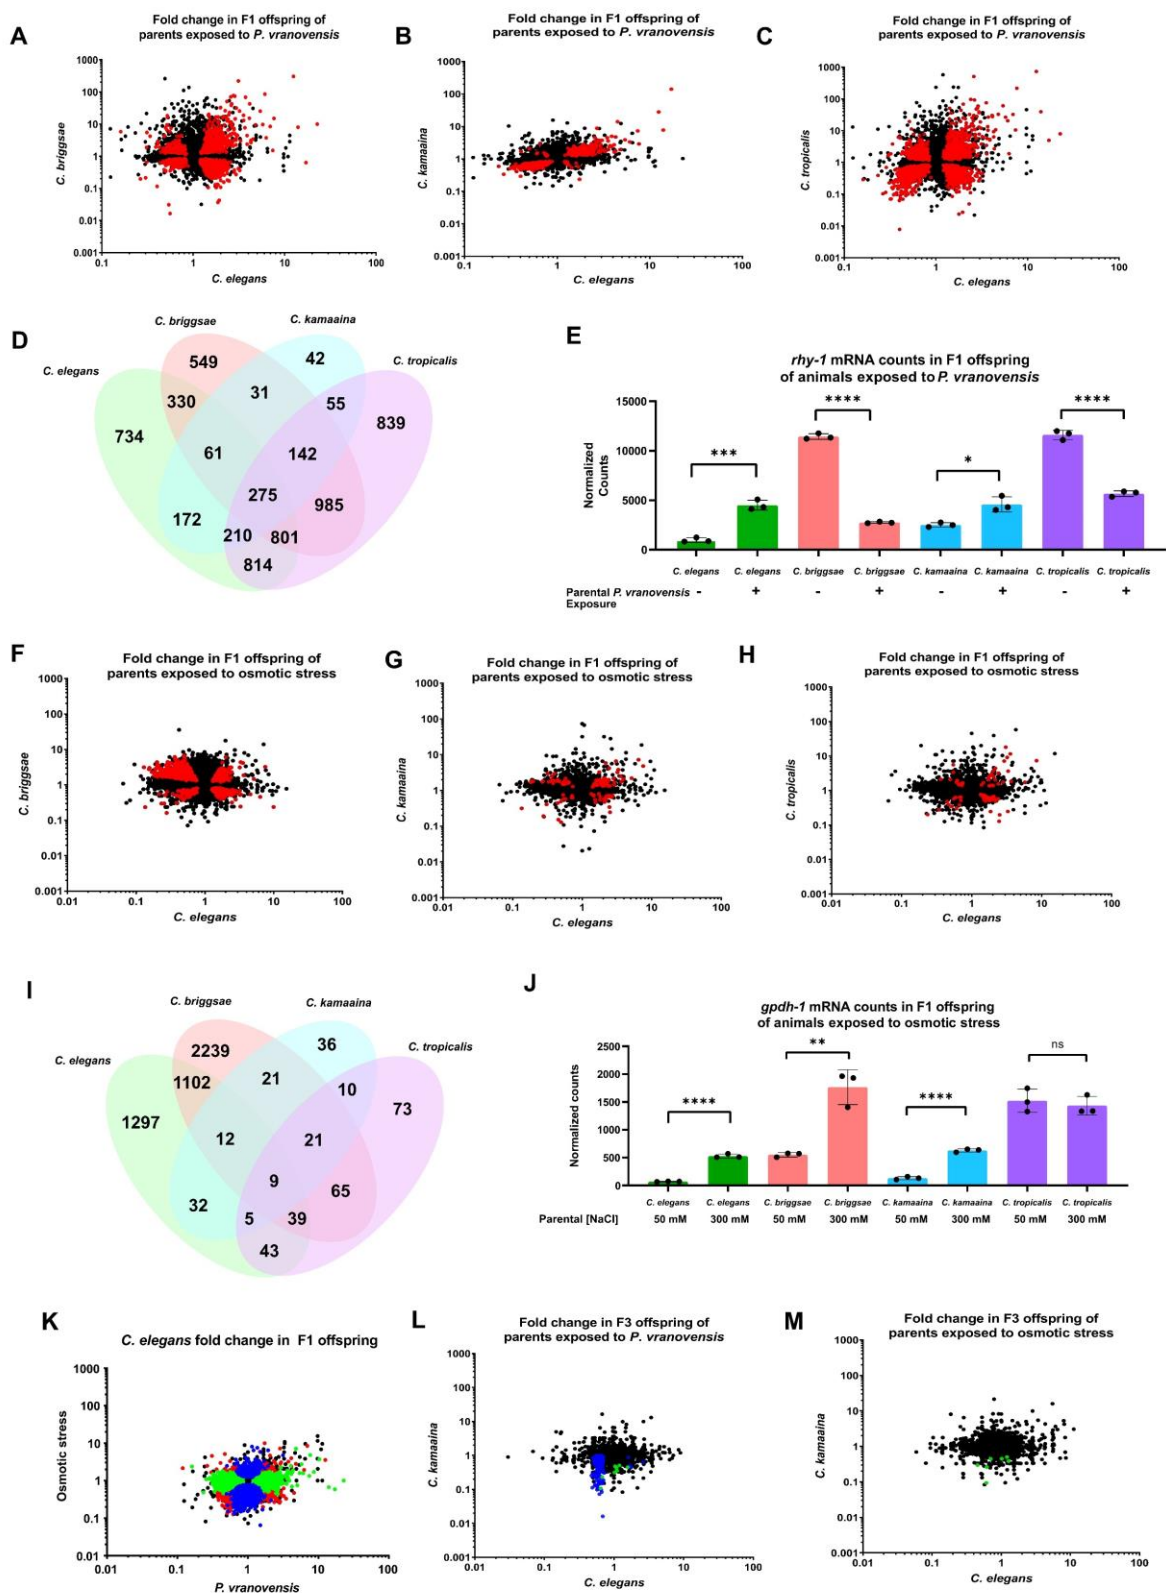

Figure 2. Parental exposure to *P. vranovensis* and osmotic stress have overlapping effects on offspring gene expression across multiple species. (A) Average fold change of 7,587 single-copy orthologue genes in F1 progeny of *C. elegans* and *C. briggsae* parents fed *P. vranovensis* BIGb0446 when compared to parents fed *E. coli* HB101. Average fold change from three replicates. Red dots represent genes that exhibit statistically significant ( $padj < 0.01$ ) changes in both species. (B) Average fold change of 7,587 single-copy orthologue genes in F1 progeny of *C. elegans* and *C. kamaaina* parents fed *P. vranovensis* BIGb0446 when compared to parents fed *E. coli* HB101. Average fold change from three replicates. Red dots represent genes that exhibit statistically significant ( $padj < 0.01$ ) changes in both species (C) Average fold change of 7,587 single-copy orthologue genes in F1 progeny of *C. elegans* and *C. tropicalis* parents fed *P. vranovensis* BIGb0446 when compared to parents fed *E. coli* HB101. Average fold change from three replicates. Red dots represent genes that exhibit statistically significant ( $padj < 0.01$ ) changes in both species (D) Venn diagram of the number of genes that exhibit overlapping statistically significant ( $padj < 0.01$ ) changes in expression in F1 progeny of animals exposed to *P. vranovensis* BIGb0446 in each species. (E) Normalized counts of reads matching orthologues of *rhy-1* in the F1 offspring of parents fed either *E. coli* HB101 or *P. vranovensis* BIGb0446. Data from Supplemental Table 2.  $n = 3$  replicates. (F) Average fold change of 7,587 single-copy orthologue genes in F1 progeny of *C. elegans* and *C. briggsae* parents grown at 300 mM NaCl when compared to parents grown at 50 mM NaCl. Average fold change from three replicates. Red dots represent genes that exhibit statistically significant ( $padj < 0.01$ ) changes in both species. (G) Average fold change of 7,587 single-copy orthologue genes in F1 progeny of *C. elegans* and *C. kamaaina* parents grown at 300 mM NaCl when compared to parents grown at 50 mM NaCl. Average fold change from three replicates. Red dots represent genes that exhibit statistically significant ( $padj < 0.01$ ) changes in both species. (H) Average fold change of 7,587 single-copy orthologue genes in F1 progeny of *C. elegans* and *C. tropicalis* parents grown at 300 mM NaCl when compared to parents grown at 50 mM NaCl. Average fold change from three replicates. Red dots represent genes that exhibit statistically significant ( $padj < 0.01$ ) changes in both species. (I) Venn diagram of the number of genes that exhibit overlapping statistically significant ( $padj < 0.01$ ) changes in expression in F1 progeny of animals grown at 300 mM NaCl in each species. (J) Normalized counts of reads matching orthologues of *gpdh-1* in the F1 progeny of parents grown at either 300 mM NaCl or 50 mM NaCl. Data from Supplemental Table 3.  $n = 3$  replicates. (K) Average fold change for 7,587 orthologue genes in F1 progeny of *C. elegans* parents fed *P. vranovensis* or exposed to 300 mM NaCl when compared to naïve parents. Average fold change from three replicates. Red dots – genes that change in expression in response to both stresses. Blue dots – genes that change in expression in response to only osmotic stress. Green dots – genes that change in expression in response to only *P. vranovensis*. (L) Average fold change of 7,512 single-copy orthologue genes in F3 progeny of *C. elegans* and *C. kamaaina* fed *P. vranovensis* BIGb0446 when compared to those fed *E. coli* HB101. Average fold change from three replicates. Blue dots represent genes that exhibited statistically significant ( $padj < 0.01$ ) changes in *C. elegans*. Green dots represent genes that exhibited statistically significant ( $padj < 0.01$ ) changes in *C. kamaaina*. (M) Average fold change of 7,512 single-copy orthologue genes in F1 progeny of *C. elegans* and *C. kamaaina* parents grown at 300 mM NaCl when compared to parents grown at 50 mM NaCl. Average fold change from three replicates. Green dots represent genes that exhibited statistically significant ( $padj < 0.01$ ) changes in *C. kamaaina*. \* $p < 0.05$ , \*\* $p < 0.01$ , \*\*\* $p < 0.0001$ , \*\*\*\* $p < 0.0001$

241

242 **Different parental stresses have distinct effects on offspring gene expression**

243

244 We performed the same analysis on the offspring of all four species from parents exposed to  
245 osmotic stress. From this analysis we observed that parental exposure to osmotic stress resulted  
246 1,163 genes exhibiting differential expression in both *C. elegans* and *C. briggsae* offspring  
247 (Figure 2F-K and Supplemental Table 3). In addition, we found that these changes in gene  
248 expression were largely distinct from the gene expression changes observed in the offspring of  
249 parents exposed to *P. vranovensis* (Figure 2K and Supplemental Tables 2 and 3), indicating that  
250 different parental stresses have distinct effects on offspring gene expression. However, parental  
251 exposure to *C. kamaaina* and *C. tropicalis* to osmotic stress resulted in approximately 5-fold  
252 fewer changes in offspring gene expression (Figure 2G-H and Supplemental Table 3). In total  
253 only nine genes exhibited differential expression in the offspring of parents exposed to osmotic  
254 stress in all four species (Figure 2I) and five of these nine were also observed to change in the  
255 offspring of parents exposed to *P. vranovensis* (Supplemental Table 3).

256

257 Unlike *C. elegans*, *C. briggsae*, and *C. kamaaina*, parental exposure of *C. tropicalis* to osmotic  
258 stress did not protect offspring from future osmotic stress (Figure 1D). We therefore identified  
259 genes that were differentially expressed in the F1 offspring of *C. elegans*, *C. briggsae*, and  
260 *C. kamaaina* exposed to osmotic stress, but not in *C. tropicalis*. From this analysis we identified  
261 eleven genes that are specifically differentially expressed in the three species that adapt to  
262 osmotic stress but not in *C. tropicalis*; this list of genes includes the glycerol-3-phosphate  
263 dehydrogenase *gpdh-1* which is one of the most upregulated genes in response to osmotic stress  
264 and is known to be required for animals to properly respond to osmotic stress (Lamitina et al.,  
265 2006) (Figure 2J). These results suggest that, similar to our observations for *P. vranovensis*



266 infection, different patterns in the expression of osmotic stress response genes correlate with  
267 different intergenerational phenotypic responses to osmotic stress.

268  
269 Differences in gene expression in the offspring of stressed parents could be due to programmed  
270 changes in expression in response to stress or due to indirect effects caused by changes in  
271 developmental timing. To confirm that the embryos from all conditions were collected at the  
272 same developmental stage we compared our RNA-seq findings to a time resolved transcriptome  
273 of *C. elegans* development (Boeck et al., 2016). Consistent with our visual observations that a  
274 vast majority of offspring collected were in the comma stage of embryo development, we found  
275 that the gene expression profiles of all offspring from both naïve and stressed parents overlapped  
276 strongly with the 330-450 minute timepoints of development (Supplemental Figure 3A). In  
277 addition, we found that approximately 50% of all genes that were differentially expressed in the  
278 offspring of stressed parents when compared to naïve parents exhibited a change in gene  
279 expression that was more than one standard deviation outside their average expression across all  
280 timepoints of embryo development (Supplemental Figure 3B-3C). We similarly found that many  
281 of the genes known to be required for intergenerational responses to stress exhibit expression  
282 that is outside the range of expression observed at any time point of early development  
283 (Supplemental Figure 3D-3E). These results suggest that a majority of the expression differences  
284 we observed in the offspring of stressed parents were not due to differences in developmental  
285 timing.

286

287 **The effects of parental bacterial infection and osmotic stress on offspring gene expression**  
288 **are not maintained transgenerationally**

289

290 Determining whether the effects of parental exposure to stress on offspring gene expression are  
291 reversible after one generation or if any changes in gene expression persist transgenerationally is  
292 a critical and largely unanswered question in the field of multigenerational effects. To test if any  
293 of the intergenerational changes in gene expression that we observed persist transgenerationally  
294 we performed RNA-seq of F3 progeny of *C. elegans* exposed to both *P. vranovensis* and osmotic  
295 stress. We found that only 121 of the 3,397 genes that exhibited intergenerational (F1) changes  
296 in gene expression in response to *P. vranovensis* infection were also differentially expressed  
297 transgenerationally in *C. elegans* F3 progeny (Figure 2K and Supplemental Table 4).  
298 Furthermore, we found that only two of the 2,539 genes that exhibited intergenerational changes  
299 in expression in response to osmotic stress were also differentially expressed in *C. elegans* F3  
300 progeny (Figure 2L and Supplemental Table 4). We conclude that the vast majority of  
301 intergenerational effects of these stresses on gene expression do not persist transgenerationally.  
302 To test if any of the 123 genes that exhibited differential expression in the F3 progeny of  
303 *C. elegans* exposed to *P. vranovensis* or osmotic stress also exhibit transgenerational changes in  
304 expression in other *Caenorhabditis* species, we performed the same experiments on  
305 *C. kamaaina*, which also intergenerationally adapts to both *P. vranovensis* infection and osmotic  
306 stress. We found that none of the 123 genes that were differentially expressed in the F3 progeny  
307 of *C. elegans* exposed to either *P. vranovensis* or osmotic stress were also differentially  
308 expressed in the F3 progeny of *C. kamaaina* under the same conditions (Figure 2K and  
309 Supplemental Table 4). Our results suggest that neither of these biotic or abiotic stresses that  
310 elicit robust intergenerational changes in gene expression cause similar transgenerational  
311 changes in gene expression in a second *Caenorhabditis* species under the same conditions. We  
312 note, however, that it remains possible that transgenerational effects of these stresses could

313 persist through other mechanisms, could affect the expression of genes that are not clearly  
314 conserved between species, or could exert weaker effects on broad classes of genes that would  
315 not be detectable at any specific individual loci as was reported for the transgenerational effects  
316 of starvation and loss of COMPASS complex function on gene expression in *C. elegans* (Greer  
317 et al., 2011; Webster et al., 2018). Furthermore, it is possible that transgenerational effects on  
318 gene expression in *C. elegans* are restricted to germ cells (Buckley et al., 2012; Hourri-Zeevi et  
319 al., 2020; Posner et al., 2019) and are not detectable in somatic tissue. Such effects that occur  
320 specifically in germ cells might not have been detectable in the early developmental stage  
321 assayed here.

322

### 323 **Intergenerational responses to stress can have deleterious trade offs**

324

325 Intergenerational changes in animal physiology that protect offspring from future exposure to  
326 stress could be stress-specific or could converge on a broadly stress resistant state. If  
327 intergenerational adaptive effects are stress-specific, then it is expected that parental exposure to  
328 a given stress will protect offspring from that same stress but potentially come at the expense of  
329 fitness in mismatched environments. If intergenerational adaptations to stress converge on a  
330 generally more stress resistant state, then parental exposure to one stress might protect offspring  
331 against many different types of stress. To determine if the intergenerational effects we  
332 investigated here represent specific or general responses we assayed how parental *C. elegans*  
333 exposure to osmotic stress, *P. vranovensis* infection, and *N. parisii* infection, either alone or in  
334 combination, affected offspring responses to mismatched stresses. We found that parental  
335 exposure to *P. vranovensis* did not affect the ability of animals to intergenerationally adapt to

336 osmotic stress (Figure 3A). By contrast, parental exposure to osmotic stress completely  
337 eliminated the ability of animals to intergenerationally adapt to *P. vranovensis* (Figure 3B). This  
338 effect is unlikely to be due to the effects of osmotic stress on *P. vranovensis* itself, as mutant  
339 animals that constitutively activate the osmotic stress response (*osm-8*) were also completely  
340 unable to adapt to *P. vranovensis* infection (Figure. 3C) (Rohlfing et al., 2011). We conclude that  
341 animals' intergenerational responses to *P. vranovensis* and osmotic stress are stress-specific,  
342 consistent with our observation that parental exposure to these two stresses resulted in distinct  
343 changes in offspring gene expression (Figure 2K).

344

345 We performed a similar analysis comparing animals' intergenerational response to osmotic stress  
346 and the eukaryotic pathogen *N. parisii*. We previously reported that L1 parental infection with  
347 *N. parisii* results in progeny that is more sensitive to osmotic stress (Willis et al., 2021). Here we  
348 found that L4 parental exposure of *C. elegans* to *N. parisii* had a small, but not significant effect  
349 on offspring response to osmotic stress (Figure 3D). However, similar to our observations for  
350 osmotic stress and bacterial infection, we found that parental exposure to both osmotic stress and  
351 *N. parisii* infection simultaneously resulted in offspring that were less protected against future  
352 *N. parisii* infection than when parents are exposed to *N. parisii* alone (Figure 3E). Collectively,  
353 these data further support the conclusion that intergenerational responses to infection and  
354 osmotic stress are stress-specific and suggest that intergenerational adaptations to osmotic stress  
355 might come at the expense of animals' ability to properly respond to bacterial or eukaryotic  
356 infections when either is paired with osmotic stress.

357

358 To compare animals' intergenerational responses to bacterial infection and eukaryotic infection  
359 we performed a similar comparative analysis. We found that parental exposure to *P. vranovensis*  
360 had no observable effect on offspring response to *N. parisii* either alone or when both pathogens  
361 were present simultaneously (Figure 1F). Similarly, we found that parental exposure to *N. parisii*  
362 had no observable effect on offspring response to *P. vranovensis* either alone or when both  
363 pathogens were present at the same time (Figure 1G). We conclude that intergenerational  
364 adaptations to osmotic stress, *P. vranovensis* infection and *N. parisii* infection are largely stress-  
365 specific.

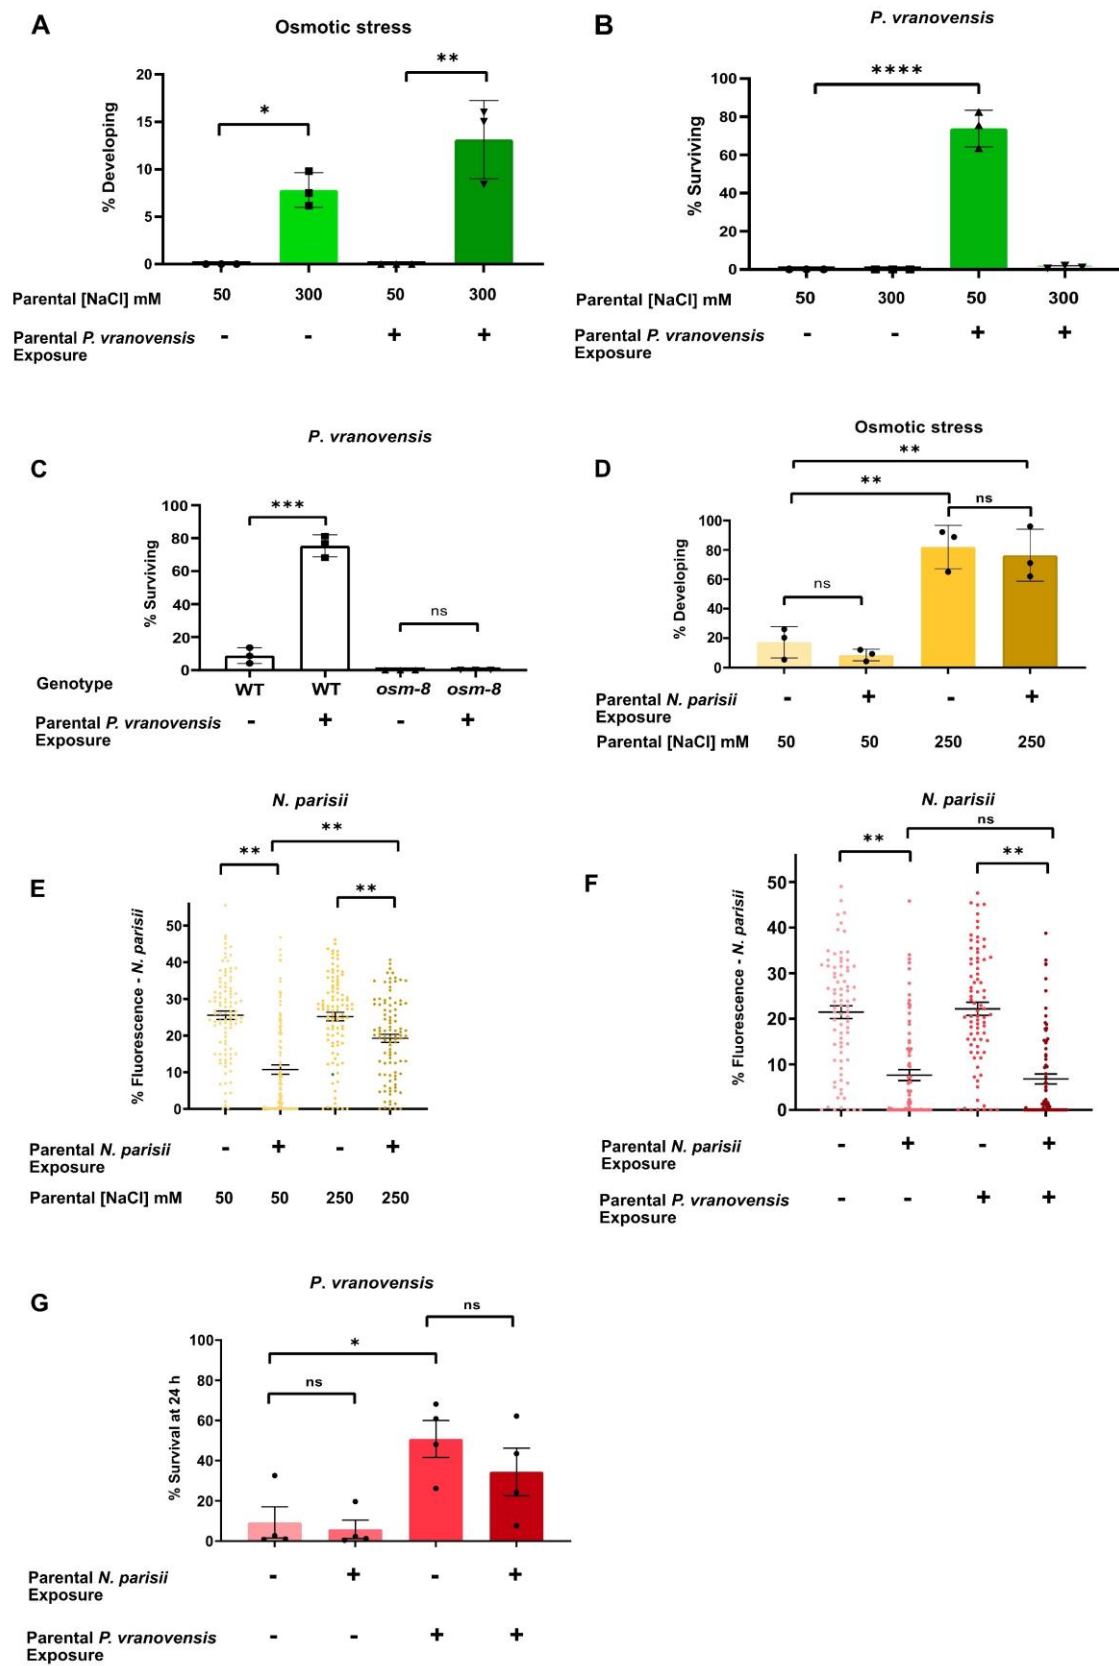

367

Figure 3. Intergenerational adaptations to stress are stress-specific and have deleterious trade-offs. (A) Percent of wild-type *C. elegans* mobile and developing at 500 mM NaCl after 24 hours. Data presented as mean values  $\pm$  s.d.  $n = 3$  experiments of >100 animals. (B) Percent of wild-type *C. elegans* surviving after 24 hours of exposure to *P. vranovensis* BIGb0446. Data presented as mean values  $\pm$  s.d.  $n = 3$  experiments of >100 animals. (C) Percent of wild-type and *osm-8(n1518)* *C. elegans* surviving after 24 hours of exposure to *P. vranovensis* BIGb0446. Data presented as mean values  $\pm$  s.d.  $n = 3$  experiments of >100 animals. (D) Percent of wild-type *C. elegans* mobile and developing at 420 mM NaCl after 48 hours. Data presented as mean values  $\pm$  s.d.  $n = 3$  experiments of >100 animals. (E) *N. parisii* parasite burden of individual *C. elegans* after 72 h (as determined by percentage fluorescence from DY96-stained spores after 72 h). Data presented as mean values  $\pm$  s.e.m.  $n = 4$  experiments of 25 animals (F) *N. parisii* parasite burden of individual *C. elegans* after 72 h (as determined by percentage fluorescence from DY96-stained spores after 72 h). Data presented as mean values  $\pm$  s.e.m.  $n = 3$  experiments of 25 animals. (G) Percent of wild-type *C. elegans* surviving after 24 hours of exposure to *P. vranovensis* BIGb0446. Data presented as mean values  $\pm$  s.e.m.  $n = 3$  experiments of >100 animals. \* $p < 0.05$ , \*\* $p < 0.01$ , \*\*\*  $p < 0.0001$ , \*\*\*\*  $p < 0.0001$

368

369 **Intergenerational responses to *Pseudomonas* pathogens are distinct from other bacterial**  
370 **pathogens**

371

372 To further probe the specificity of intergenerational responses to stress we also sought to  
373 determine if the substantial changes in pathogen resistance and gene expression observed in  
374 *C. elegans* offspring from parents exposed to the bacterial pathogen *P. vranovensis* were specific  
375 to this pathogen or part of a general response to bacterial pathogens. To test this we first  
376 screened wild bacterial isolates from France (Samuel et al., 2016) and the United Kingdom  
377 (Supplemental Table 5) for those that are potential natural pathogens of *C. elegans* and that also  
378 intergenerationally affect *C. elegans* survival or growth rate. From this analysis we identified a  
379 new *Pseudomonas* isolate, *Pseudomonas sp.* 15C5, where parental exposure to *Pseudomonas sp.*  
380 15C5 enhanced offspring growth rate in response to future exposure to *Pseudomonas sp.* 15C5

381 (Figure 4A). This intergenerational effect resembled *C. elegans* intergenerational adaptation to  
382 *P. vranovensis* and we found that parental exposure to either isolate of *Pseudomonas* protected  
383 offspring from future exposure to the other *Pseudomonas* isolate (Figure 4A-B). To test if  
384 *Pseudomonas sp. 15C5* was a new isolate of *P. vranovensis* or a distinct species of *Pseudomonas*  
385 we performed both 16S rRNA sequencing and sequenced the gene *rpoD* of *Pseudomonas sp.*  
386 15C5. From this analysis we found that *Pseudomonas sp. 15C5* is not an isolate of  
387 *P. vranovensis* and is most similar to *Pseudomonas putida* – 99.49% identical 16S rRNA and  
388 98.86% identical *rpoD* by BLAST (Supplemental File 1). These results indicate that parental  
389 exposure to multiple different *Pseudomonas* species can protect offspring from future pathogen  
390 exposure. We note, however, that other pathogenic species of *Pseudomonas*, such as  
391 *P. aeruginosa*, did not cross protect against *P. vranovensis* (Burton et al., 2020), indicating that  
392 not all pathogenic species of *Pseudomonas* result in the same intergenerational changes in  
393 offspring pathogen resistance.

394  
395 In addition to these intergenerational adaptive effects, we also identified two bacterial isolates  
396 that activate pathogen response pathways, *Serratia plymutica* BUR1537 and *Aeromonas sp.*  
397 BIGb0469 (Samuel et al., 2016; Hellberg et al., 2015), that resulted in intergenerational  
398 deleterious effects (Figure 4C-D). Parental exposure of animals to these potential bacterial  
399 pathogens did not intergenerationally protect animals against *P. vranovensis* (Supplemental  
400 Figure 4). We conclude that parental exposure to some species of *Pseudomonas* can protect  
401 offspring from other species of *Pseudomonas*, but that these effects are likely specific to a subset  
402 of *Pseudomonas* species and not part of a broad response to gram negative bacterial pathogens.

403



404 To determine how different parental bacterial infections affect offspring gene expression  
405 patterns, we profiled gene expression in the offspring of *C. elegans* parents exposed to each of  
406 *P. vranovensis* BIGb0427, *Pseudomonas sp.* 15C5, *Serratia plymuthica* BUR1537, and  
407 *Aeromonas sp.* BIGb0469. We found that only 109 genes exhibit differential expression in the  
408 offspring of parents exposed to all four potential pathogens (Figure 4E-H). However, we  
409 identified 1,626 genes that are specifically differentially expressed in the offspring of parents  
410 exposed to *P. vranovensis* and *Pseudomonas sp.* 15C5 but not in the offspring of parents exposed  
411 to *S. plymuthica* BUR1537 or *Aeromonas sp.* BIGb0469 (Figure 4H and Supplemental Table 6).  
412 We conclude that parental exposure to bacterial pathogens that elicit enhanced offspring  
413 resistance to *P. vranovensis* resulted in distinct changes in offspring gene expression that are not  
414 observed when parents are exposed to other gram-negative bacterial pathogens. Collectively,  
415 our results suggest that a majority of the intergenerational effects of a parent's environment on  
416 offspring gene expression are both stress and pathogen specific.

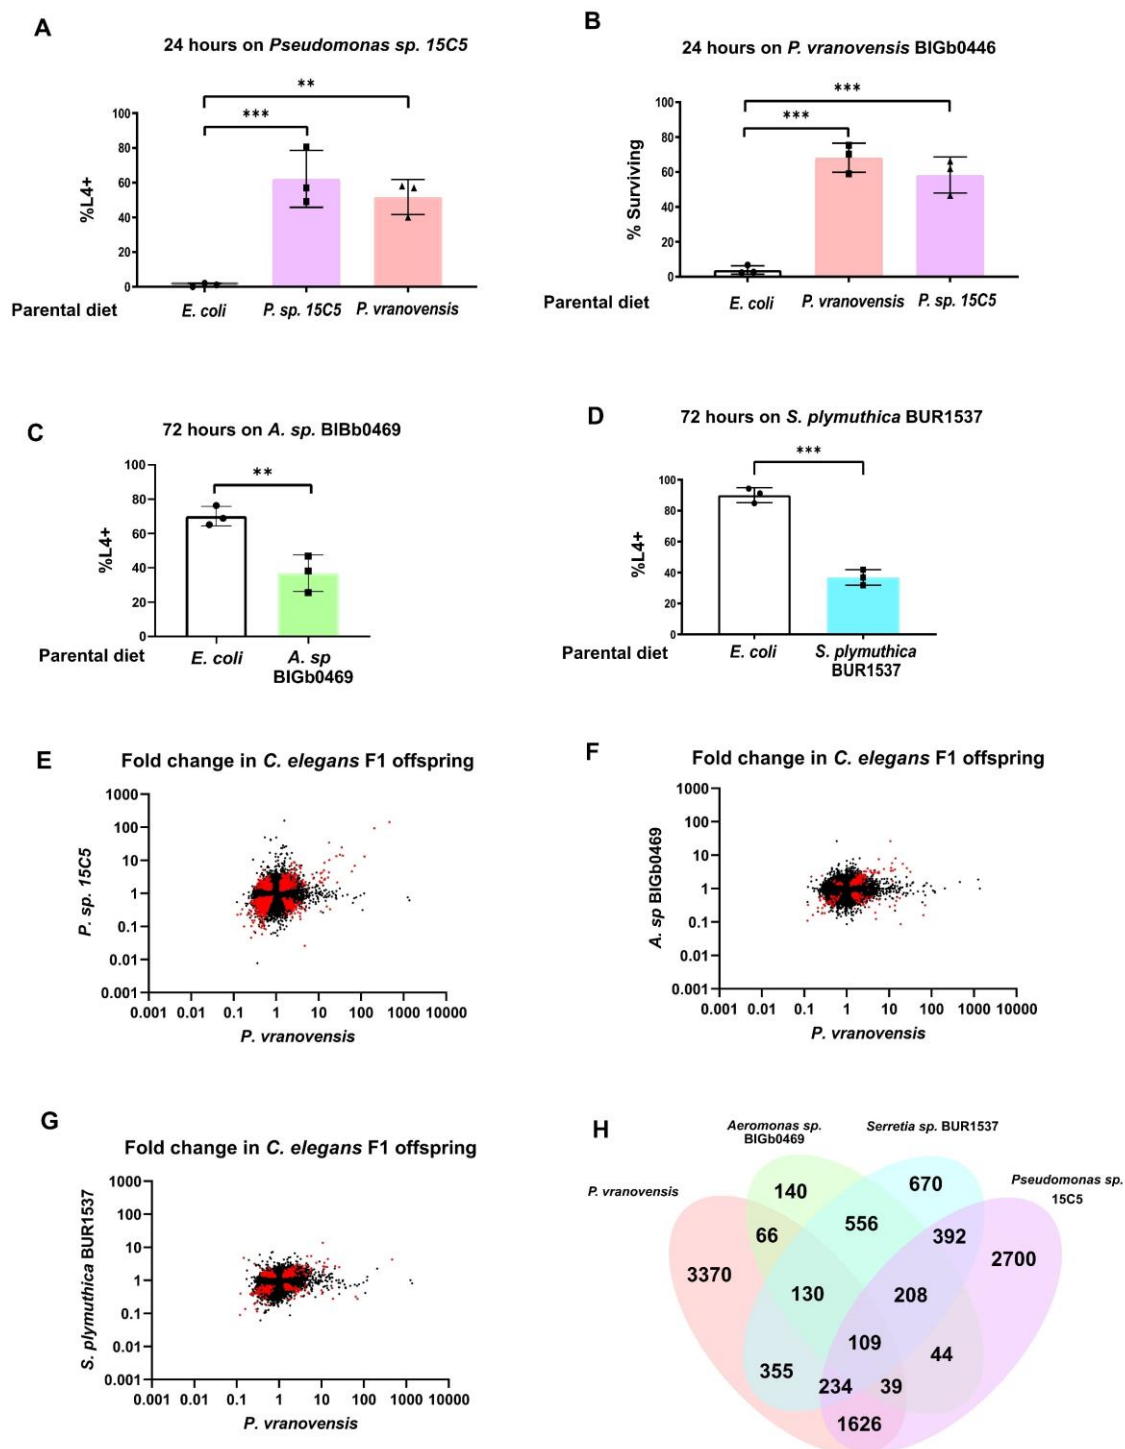

Figure 4. Many of the intergenerational effects of parental exposure to bacterial pathogens on offspring gene expression are pathogen specific. (A) Percent of wild-type *C. elegans* that developed to the L4 larval stage after 48 hours of feeding on *Pseudomonas sp.* 15C5. Data presented as mean values  $\pm$  s.d.  $n = 3$  experiments of  $>100$  animals. (B) Percent of wild-type *C. elegans* surviving after 24 hours of exposure to *P. vranovensis* BIGb0446. Data presented as mean values  $\pm$  s.d.  $n = 3$  experiments of  $>100$  animals. (C) Percent of wild-type *C. elegans* that developed to the L4 larval stage after 48 hours of feeding on *Aeromonas sp.* BIGb0469. Data presented as mean values  $\pm$  s.d.  $n = 3$  experiments of  $>100$  animals. (D) Percent of wild-type *C. elegans* that developed to the L4 larval stage after 48 hours of feeding on *Serratia plymuthica* BUR1537. Data presented as mean values  $\pm$  s.d.  $n = 3$  experiments of  $>100$  animals. (E) Average fold change of genes in F1 progeny of *C. elegans* fed either *Pseudomonas sp.* 15C5 or *P. vranovensis* BIGb0446 when compared to parents fed *E. coli* HB101. Average fold change from three replicates. Red dots represent genes that exhibit statistically significant ( $padj < 0.01$ ) changes in the F1 offspring of parents fed both *Pseudomonas sp.* 15C5 and *P. vranovensis* BIGb0446. (F) Average fold change of genes in F1 progeny of *C. elegans* fed either *Aeromonas sp.* BIGb0469 or *P. vranovensis* BIGb0446 when compared to parents fed *E. coli* HB101. Average fold change from three replicates. Red dots represent genes that exhibit statistically significant ( $padj < 0.01$ ) changes in the F1 offspring of parents fed both *Aeromonas sp.* BIGb0469 and *P. vranovensis* BIGb0446. (G) Average fold change of genes in F1 progeny of *C. elegans* fed either *Serratia plymuthica* BUR1537 or *P. vranovensis* BIGb0446 when compared to parents fed *E. coli* HB101. Average fold change from three replicates. Red dots represent genes that exhibit statistically significant ( $padj < 0.01$ ) changes in the F1 offspring of parents fed both *Serratia plymuthica* BUR1537 and *P. vranovensis* BIGb0446. (H) Venn diagram of the number of genes that exhibit overlapping statistically significant ( $padj < 0.01$ ) changes in expression in F1 progeny of *C. elegans* parents fed each different bacterial species. \*\* $p < 0.01$ , \*\*\*  $p < 0.0001$ ,

418

## 419 Discussion

420 Our findings provide some of the first evidence that the mechanisms underlying  
421 intergenerational effects of a parent's environment on offspring are evolutionarily conserved  
422 among different species, are stress-specific, and exhibit deleterious tradeoffs in complex  
423 environments. These findings provide a base from which we can compare the numerous different  
424 reported observations of multigenerational effects in *C. elegans* to similar effects in other  
425 species. For example, we identified 279 genes that exhibited intergenerational regulation of  
426 expression in response to the specific stresses of *P. vranovensis* infection or osmotic stress in all

427 species studied (Figure 3). We propose that these genes might be particularly tuned for  
428 intergenerational regulation and might similarly be involved in intergenerational responses to  
429 stress in other species, including species outside the *Caenorhabditis* genus.

430  
431 Notably, we found that the expression of these 279 genes in the offspring of parents exposed to  
432 either *P. vranovensis* infection or osmotic stress were still differentially expressed in  
433 *C. tropicalis* even though parental exposure to these stresses did not appear to affect offspring  
434 stress resistance in either assay (Figures 1 and 2). We hypothesize that the molecular  
435 consequences of parental stress on offspring, such as changes in the expression of stress response  
436 genes, might be more easily identifiable than the specific physiological consequences of parental  
437 stress on offspring. In this case we might not have detected the unique phenotypic effects of  
438 parental exposure to stress on offspring in *C. tropicalis* using our assay conditions, but such  
439 effects might still exist in this species and be related to those observed in other species. Future  
440 studies of the phenotypic effects of parental stress on offspring across species will likely shed  
441 significant light on how similar molecular mechanisms can mediate different intergenerational  
442 responses to stress across evolution.

443  
444 Consistent with the hypothesis that parental exposure to the same stress might elicit distinct  
445 phenotypic effects on offspring in different species via evolutionarily related mechanisms, we  
446 found that parental exposure of *C. briggsae* to *P. vranovensis* had a strong deleterious effect on  
447 offspring pathogen resistance even though parental exposure of *C. elegans* and *C. kamaaina* to  
448 *P. vranovensis* resulted in increased offspring resistance to *P. vranovensis* (Figure 1B). This  
449 inversion of an intergenerational effect from a presumed adaptive effect to a presumed

450 deleterious effect correlated with an inversion in the expression of specific pathogen response  
451 genes that were previously reported to be required for animals to intergenerationally adapt to  
452 *P. vranovensis*, such as *rhy-1* which exhibits increased expression in *C. elegans* and *C. kamaaina*  
453 offspring from infected parents but decreased expression in *C. briggsae* offspring from infected  
454 parents (Figure 2E). To our knowledge, these findings are the first to suggest that the molecular  
455 mechanisms underlying presumed adaptive and deleterious intergenerational effects in different  
456 species are evolutionarily related at the gene expression level. These findings suggest that similar  
457 observations of presumed intergenerational deleterious effects in diverse species, such as fetal  
458 programming in humans, might also be molecularly related to intergenerational adaptive effects  
459 in other species. Alternatively, our findings suggest that presumed intergenerational deleterious  
460 effects might in fact represent deleterious tradeoffs that are adaptive in other contexts. We expect  
461 that a more complete consideration of the evolution of intergenerational effects and the potential  
462 relationship between adaptive and deleterious effects will play an important role in  
463 understanding how intergenerational effects contribute to organismal resilience in changing  
464 environments, what role such effects play in evolution, and how such effects contribute to  
465 multiple human pathologies associated with a parent's environment (Langley-Evans, 2006).  
466

467 Lastly, the extent to which intergenerational and transgenerational responses to environmental  
468 stress represent related, independent, or even mutually exclusive phenomena represents a major  
469 outstanding question in the field of multigenerational effects. Evolutionary modelling of  
470 intergenerational and transgenerational effects has suggested that different evolutionary  
471 pressures favor the evolution of either intergenerational or transgenerational responses under  
472 different conditions. Specifically, it has been suggested that intergenerational effects are favored  
473 when offspring environmental conditions are predictable from the parental environment (Uller,

474 2008). Furthermore, it has been speculated that intergenerational adaptations to stress will have  
475 costs (Uller, 2008). These costs, such as the costs we observed for animals intergenerational  
476 adaptation to osmotic stress (Figure 3), are likely to strongly favor the loss or active erasure of  
477 intergenerational effects if the parental environment improves to avoid potential deleterious  
478 effects when a stress is no longer present. By contrast, transgenerational effects were found to  
479 predominantly be favored when parental environmental cues are unreliable and the maintenance  
480 of information across many generations might be worth the potential costs (Uller et al., 2015).  
481 Our findings support a model in which intergenerational and transgenerational effects represent  
482 potentially distinct phenomena. Specifically, multiple of the intergenerational responses to  
483 different stresses studied here were previously reported to be intergenerational in nature and only  
484 last for a single generation (Burton et al., 2020, 2017; Hibshman et al., 2016; Willis et al., 2021).  
485 Our studies provide further evidence that the effects of the parental exposure to osmotic stress  
486 and *P. vranovensis* infection are predominantly intergenerational in nature as we did not detect  
487 any conserved transgenerational changes in gene expression in response to either stress (Figure  
488 2). We strongly suspect that future studies into the mechanisms regulating these intergenerational  
489 effects will shed significant light on how intergenerational effects on gene expression are lost  
490 and/or erased. In addition, we expect that similar studies of transgenerational effects will  
491 potentially elucidate the circumstances under which animals decide environmental information  
492 might be worth maintaining despite any potential tradeoffs and if the growing number of  
493 transgenerational effects observed in *C. elegans* are similarly evolutionarily conserved.

494

495 Lastly, future studies of intergenerational effects will be critical in determining the extent to  
496 which the mechanisms that mediate intergenerational effects are conserved outside of  
497 *Caenorhabditis* and if similar mechanisms to those uncovered in *C. elegans* mediate the

498 numerous different adaptive and deleterious intergenerational effects that have been reported in  
499 diverse taxa ranging from the intergenerational development of wings in aphids (Vellichirammal  
500 et al., 2017) to fetal programming and the role it plays in disease in humans (Langley-Evans,  
501 2006).

502

## 503 **Methods**

504 Strains. *C. elegans* strains were cultured and maintained at 20 °C unless noted otherwise. The  
505 Bristol strain N2 was the wild-type strain. Wild isolate strains used in the main figures of this  
506 study: N2 (*C. elegans*), AF16 (*C. briggsae*), JU1373 (*C. tropicalis*), and QG122 (*C. kamaaina*).  
507 Wild-isolate strains used in supplemental figures of this study: MY1 (*C. elegans*), PS2025  
508 (*C. elegans*), CX11262 (*C. elegans*), JU440 (*C. elegans*), JU778 (*C. elegans*), JU1213  
509 (*C. elegans*), LKC34 (*C. elegans*), JU1491 (*C. elegans*), EG4724 (*C. elegans*), KR314  
510 (*C. elegans*), SX1125 (*C. briggsae*), and JU1348 (*C. briggsae*). Mutant alleles used in this study:  
511 *osm-8(n1518)* and *Cbr-gpdh-2(syb2973)*.

512

513 *P. vranovensis* survival assays. *P. vranovensis* BIGb0446 or *Pseudomonas sp.* 15C5 was  
514 cultured in LB at 37 °C overnight. 1 mL of overnight culture was seeded onto 50 mm NGM agar  
515 plates and dried in a laminar flow hood (bacterial lawns completely covered the plate such that  
516 animals could not avoid the pathogen). All plates seeded with BIGb0446 or 15C5 were used the  
517 same day they were seeded. Young adult animals were placed onto 50 mm NGM agar plates  
518 seeded with 1 mL either *E. coli* HB101, *P. vranovensis* BIGb446, or *Pseudomonas sp.* 15C5 for  
519 24 h at room temperature (22 °C). Embryos from these animals were collected by bleaching and

520 placed onto fresh NGM agar plates seeded with BIGb0446. Percent surviving were counted after  
521 24 h at room temperature (22 °C) unless otherwise noted.

522

523 Osmotic stress and *P. vranovensis* multiple stress adaptation assays. Young adult animals that  
524 were grown on NGM agar plates seeded with *E. coli* HB101 were collected and transferred to  
525 new 50 mM NaCl control plates seeded with *E. coli* HB101, 300 mM NaCl plates seeded with *E.*  
526 *coli* HB101, 50 mM NaCl control plates seeded with *P. vranovensis* BIGb0446, or, 300 mM  
527 NaCl plates seeded with *P. vranovensis* BIGb0446. Animals were grown for 24 hours at room  
528 temperature (22 °C). Embryos from these animals were collected by bleaching and transferred to  
529 new 500 mM NaCl plates seeded with *E. coli* HB101 or 50 mM NaCl plates seeded with  
530 *P. vranovensis* BIGb0446. Percent of animals developing or surviving was scored after 24 hours  
531 at room temperature as previously described in Burton et al., 2017 and Burton et al., 2020.

532

533 Preparation of *N. parisii* spores. Spores were prepared as described previously (Willis et al.,  
534 2021). In brief, large populations of *C. elegans* N2 were infected with microsporidia spores.  
535 Infected worms were harvested and mechanically disrupted using 1 mm diameter Zirconia beads  
536 (BioSpec). Resulting lysate was filtered through 5 µm filters (Millipore Sigma™) to remove  
537 nematode debris. Spore preparations were tested for contamination and those free of contaminating  
538 bacteria were stored at -80°C.

539

540 *N. parisii* infection assays and multiple stress adaptation assays. P0 populations of 2500 animals  
541 were mixed with 1 ml of 10X saturated *E. coli* OP50-1 or *P. vranovensis* and a low dose of  
542 *N. parisii* spores (see Table 1) and plated on a 10 cm plate. This low dose limited the detrimental



543 effects on animal fertility that are observed with higher doses, while ensuring most animals were  
544 still infected. F1 populations of 1000 animals were mixed with 400  $\mu$ l of 10X saturated *E. coli*  
545 OP50-1 and a high dose of *N. parisii* spores (see Table 1) and plated on a 6 cm plate.

546

547 Table 1. Details of *N. parisii* doses employed.

| <i>N. parisii</i><br>dose | Plate concentration<br>(spores/cm <sup>2</sup> ) | Millions of spores used |             |
|---------------------------|--------------------------------------------------|-------------------------|-------------|
|                           |                                                  | 6 cm plate              | 10 cm plate |
| Low                       | ~32,000                                          |                         | 2.5         |
| High                      | ~88,000                                          | 2.5                     |             |

548

549 To test for inherited immunity to *N. parisii* in *C. elegans*, *C. briggsae*, *C. tropicalis* and  
550 *C. kamaaina*, synchronized animals were infected from the L1 larval stage with a low dose of *N.*  
551 *parisii*. *C. elegans* and *C. briggsae* were grown for 72 hours at 21°C; *C. tropicalis* and *C.*  
552 *kamaaina* were grown for 96 hours at 21°C. Ten percent of total P0 animals were fixed in acetone  
553 for DY96 staining, as described below. Embryos from the remaining animals were collected by  
554 bleaching and synchronized by hatching overnight in M9. Resulting F1 animals were infected from  
555 the L1 larval stage with a high dose of *N. parisii*. *C. elegans* and *C. briggsae* were fixed at 72  
556 hours post infection (hpi) at 21°C; *C. tropicalis* and *C. kamaaina* were fixed at 96 hpi at 21°C.

557

558 For multiple stress adaptation assays using *N. parisii* and osmotic stress, animals were grown on  
559 NGM agar plates seeded with 10X saturated *E. coli* OP50-1 until the L4 stage. Next, animals were  
560 collected and mixed with 1 ml of either *E. coli* OP50-1 alone or supplemented with a low dose of  
561 *N. parisii* spores and plated on either 50 mM NaCl or 250 mM NaCl plates. Animals were grown  
562 for 24 hours at 21°C. Embryos from these animals were collected by bleaching. To test adaptation

563 to osmotic stress, 2000 F1 embryos were transferred to 420 mM NaCl plates seeded with *E. coli*  
564 OP50-1. Percentage of animals hatched was scored after 48 hours at 21°C, as previously described  
565 in Burton et al., 2017 and Burton et al., 2020. To test adaptation to *N. parisii*, the remaining  
566 embryos were synchronized by hatching overnight in M9. Resulting F1 animals were either not  
567 infected as controls, or infected at the L1 larval stage with a high dose of *N. parisii*. Animals were  
568 fixed after 72 hours at 21°C for DY96 staining and analysis.

569  
570 For multiple stress adaptation assays using *N. parisii* and *P. vranovensis*, animals were grown on  
571 NGM agar plates seeded with *E. coli* OP50-1 until the L4/young adult stage. Next, animals were  
572 collected and mixed with 1 ml of either *E. coli* OP50-1 alone or *E. coli* OP50-1 supplemented with  
573 a low dose of *N. parisii* spores, or 1 ml of *P. vranovensis* BIGb0446 alone or *P. vranovensis*  
574 BIGb0446 supplemented with a low dose of *N. parisii* spores. Animals were plated on NGM and  
575 grown for 24 hours at 21°C. Embryos from these animals were collected by bleaching. To test  
576 adaptation to *P. vranovensis*, 2000 F1 embryos were transferred to new NGM plates seeded with  
577 *P. vranovensis* BIGb0446. Percentage of animals surviving was scored after 24 hours at 21°C as  
578 previously described in Burton et al., 2017 and Burton et al., 2020. To test adaptation to *N. parisii*,  
579 the remaining embryos were synchronized by hatching overnight in M9. Resulting F1 animals  
580 were either not infected as controls, or infected from the earliest larval stage with a high dose of  
581 *N. parisii*. Animals were fixed after 72 hours at 21°C for DY96 staining and analysis.

582  
583 Fixation and staining of *N. parisii* infection. Worms were washed off plates with M9 and fixed  
584 in 1 ml acetone for 10 min at room temperature, or overnight at 4°C. Fixed animals were  
585 washed twice in 1 ml PBST (phosphate buffered saline (PBS) containing 0.1% Tween-20)

586 before staining. Microsporidia spores were visualized with the chitin-binding dye Direct  
587 Yellow (DY96). For DY96 staining alone, animals were resuspended in 500 µl staining  
588 solution (PBST, 0.1% sodium dodecyl sulfate [SDS], 20 µg/ml DY96), and rotated at 21°C for  
589 30 min in the dark. DY96-stained worms were resuspended in 20 µl EverBrite™ Mounting  
590 Medium (Biotium) and mounted on slides for imaging. Note: to pellet worms during fixation  
591 and staining protocols, animals were centrifuged for 30 seconds at 10,000 xg.

592

593 Image analysis of *N. parisii* infection. Worms were imaged with an Axioimager 2 (Zeiss). DY96-  
594 stained worms were imaged to determine number of embryos per worm. Worms possessing any  
595 quantity of intracellular DY96-stained microsporidia were considered infected. Precise  
596 microsporidia burdens were determined using ImageJ/FIJI (Schindelin et al., 2012). For this, each  
597 worm was defined as an individual ‘region of interest’ and fluorescence from GFP (DY96-stained  
598 microsporidia) subject to ‘threshold’ and ‘measure area percentage’ functions on ImageJ. Images  
599 were thresholded to capture the brighter signal from microsporidia spores, while eliminating the  
600 dimmer GFP signal from worm embryos. Final values are given as % fluorescence for single  
601 animals.

602

603 Preparation of OP50 for plating worms. One colony of *E. coli* strain OP50 was added to 100mL  
604 of LB and grown overnight at room temperature then stored at 4°C. 1 or 5 drops of HB101 were  
605 added to 6 or 10 cm plates of NGM, respectively, to use for growing worm strains and recovering  
606 them from starvation.

607

608 Preparation of HB101 for liquid culture. One colony of *E. coli* strain HB101 was added to a 5mL  
609 starter culture of LB with streptomycin and grown for 24 hours at 37°C. The starter cultures were  
610 then added to a 1L culture of TB and grown for another 24 hours at 37°C. The bacteria was  
611 centrifuged for 10 min at 5000 RPM to form a pellet. After being weighed, the bacteria was then  
612 resuspended in S-complete to create a 10x (250mg/mL) stock that was stored at 4°C. Further  
613 dilutions with S-complete were used to create the dilutions for each condition in this experiment.

614

615 Dietary restriction/dilution series cultures. For *C. elegans*, *C. briggsae* and *C. tropicalis*, 10 L4  
616 hermaphrodite worms were picked onto 3 10 cm plates seeded with OP50, and for *C. kamaaina*  
617 10 L4 females and ~20 males were picked onto 3 10 cm plates. For all species, adults were removed  
618 after 24 hours. *C. elegans* and *C. briggsae* were grown for 96 hours before bleaching and  
619 *C. tropicalis* and *C. kamaaina* were grown for 120 hours before bleaching due to slower growth  
620 and longer generation time. After bleaching, worms were aliquoted into 100 mL cultures of S-  
621 complete at 1 worm/100  $\mu$ L with a concentration of 25mg/mL, 12.5mg/mL 6.25mg/mL,  
622 3.13mg/mL or 1.6 mg/mL of HB101 and kept in 500mL flasks in shaking incubators at 20°C and  
623 180 RPM. Worms were grown in these cultures for 96 hrs (*C. elegans*), 102 hrs (*C. briggsae*) or  
624 120 hrs (*C. tropicalis* and *C. kamaaina*) before being bleached and prepared for starvation cultures.  
625 Due to slow development and inability to properly scale up in liquid culture, 1.6mg/mL cultures  
626 for *C. briggsae* and 1.6 and 3.13 mg/mL cultures for *C. kamaaina* were excluded from the rest of  
627 this experiment.

628

629 Starvation cultures. After bleach, embryos were placed into 5mL virgin S-basal cultures in 16 mm  
630 glass test tubes on a roller drum at 20°C at 1 worm/ $\mu$ L. Worms were aliquoted out of this culture  
631 using micropipettes for further assays.

632  
633 Measuring L1 size. 24 hours after bleach (~12 hours after hatch), 1000 L1s were pipetted out of  
634 the starvation cultures, spun down in 15mL plastic conical tubes by centrifuge for 1 min at 3000  
635 RPM then plated onto unseeded 10cm NGM plates. L1s were imaged with a Zeiss Discovery.V20  
636 stereomicroscope at 77x and measured using Wormsizer (Moore et al., 2013). Ad libitum  
637 concentration was defined as 25mg/mL and dietary restriction concentration was determined based  
638 on what concentration of HB101 produced the largest average L1 size for each strain. For *C.*  
639 *elegans*, this was 3.13mg/mL, and 8-fold dilution from ad libitum and consistent with previous  
640 determinations for dietary restriction in *C. elegans* (Hibshman et al., 2016). For *C. briggsae*, peak  
641 L1 size varied between 12.5mg/mL and 6.25 mg/mL depending on replicate. We chose to use 6.25  
642 mg/mL as the dietary restriction concentration to be consistent with replicates that were already  
643 being processed. The peak L1 size and determination of dietary restriction for *C. tropicalis* was  
644 6.13 mg/mL. *C. kamaaina* did not show a significant change in L1 size across conditions and was  
645 ultimately excluded from the brood size assay due to difficulty interpreting effects of starvation  
646 on brood size in a male-female strain.

647  
648 L1 size statistics. A linear mixed effects model was performed on the L1 size data to see if there  
649 was a significant effect of HB101 concentration on L1 size. The lme4 package in R studio was  
650 used to perform this linear mixed effects test. The function lmer() was used on data from each  
651 species, for example: `lmer(length ~ condition + (1 | replicate) + (1 | replicate:condition), data =`

652 *C. elegans*), “length” is the length in microns of each individual worm, “condition” is the fixed  
653 effect of the concentration of HB101, “1 | replicate” is the addition of the random effect of replicate  
654 to the model, “1 | replicate:condition” is the addition of the random effect per combination of  
655 replicate and condition, and “data” is the primary spreadsheet restricted by the species of interest.

656

657 *Gene orthology inference among species.* To identify one-to-one orthologues across the four  
658 species, we downloaded protein and GFF3 files for *C. elegans*, *C. briggsae*, and *C. tropicalis*  
659 genomes from WormBase (Harris et al., 2020) (version WS275) and for the *C. kamaaina*  
660 genome from caenorhabditis.org (version v1). We assessed gene set completeness using  
661 BUSCO (Simão et al., 2015) (version 4.0.6; using the parameter *-m proteins*) using the  
662 ‘nematoda\_odb10’ lineage dataset. For each species, we selected the longest isoform for each  
663 protein-coding gene using the *agat\_sp\_keep\_longest\_isoform.pl* script from AGAT (Jacques  
664 Dainat et al., 2021) (version 0.4.0). Filtered protein files were clustered into orthologous groups  
665 (OGs) using OrthoFinder (Emms and Kelly, 2019) (version 2.4.0; using the parameter *-og*) and  
666 one-to-one OGs were selected.

667

668 *F1 and F3 sample collection for RNA-seq.* Young adult animals grown on NGM agar plates  
669 seeded with *E. coli* HB101 were collected and transferred to new plates seeded with either  
670 control plates (50 mM NaCl) seeded with *E. coli* HB101, *P. vranovensis* BIGb0446,  
671 *P. vranovensis* BIGb0427, *S. plymuthica* BUR1537, *Pseudomonas sp.* 15C5, *Aeromonas sp.*  
672 BIGb0469, or plates containing 300 mM NaCl seeded with *E. coli* HB101. Animals were  
673 grown for 24 hours at room temperature (22 °C). Embryos from these animals were collected  
674 by bleaching and immediately frozen in 1 mL Trizol.

675 Analysis of RNA-Seq data. RNA libraries were prepared and sequenced by BGI TECH  
676 SOLUTIONS using 100PE DNBseq Eukaryotic Transcriptome service. Quality controlled  
677 and adapter trimming of RNA reads were performed using fastp-v4.20.0 (Chen et al., 2018)  
678 (--qualified\_quality\_phred 20 --unqualified\_percent\_limit 40 --length\_required 50 --  
679 low\_complexity\_filter --complexity\_threshold 30 --detect\_adapter\_for\_pe --correction --  
680 trim\_poly\_g --trim\_poly\_x \ --trim\_front1 2 --trim\_tail1 2 --trim\_front2 2 --trim\_tail2 2) **1**).  
681 Next, reads were aligned using STAR-2.7.1a (Dobin et al., 2013) (--alignSJoverhangMin 8 --  
682 alignSJDBoverhangMin 1 --outFilterMismatchNmax 999 --  
683 outFilterMismatchNoverReadLmax 0.04 --alignIntronMin 10 --alignIntronMax 1000000 --  
684 alignMatesGapMax 1000000 --outFilterType BySJout --outFilterMultimapNmax 10000 --  
685 winAnchorMultimapNmax 50 --outMultimapperOrder Random) **2**) against the genome of  
686 *C. elegans* WS275, *C. briggsae* WS275, *C. tropicalis* WS275 and the *C. kamaaina* genome  
687 obtained from caenorhabditis.org. Read counts were obtained using subread-2.0.0 (-M -O -p -  
688 -fraction -F GTF -a -t exon -g gene\_id) (Liao et al., 2014) **3**) using the annotation for  
689 *C. elegans* PRJNA13758.WS275, *C. briggsae* PRJNA10731.WS275, *C. tropicalis*  
690 PRJNA53597.WS275, and *C. kamaaina* Caenorhabditis\_kamaaina\_QG2077\_v1. Counts  
691 were imported into R and differential gene expression analysis was performed with DESeq2  
692 (FDR <0.01) (Love et al., 2014).

693

694 For comparisons made between different species, genes were subsetted to include only those  
695 7,587 single copy ortholog groups that were identified between the four species. In addition  
696 to the 7,203 genes that were identified as single copy ortholog groups by OrthoFinder, the  
697 7,587 contain an additional 385 ortholog groups that were identified as having more than one

698 ortholog in one out four of the species but where all but one of the multiple orthologs had no  
699 observable expression in any of the samples collected.

700

701 For the comparison between the stress response and gene expression during embryo  
702 development, data was downloaded from Boeck et al., 2016 and imported in R with raw  
703 counts from this study. The range of embryo expression for each gene was considered as one  
704 standard deviation plus / minus the mean of regularised log normalised counts across all  
705 embryo time points. DEGs from the stress experiments where the regularised log normalised  
706 counts for one or both of the comparison samples ( for all replicates ) were outside of the  
707 embryo range were considered unlikely to be caused by developmental timing.

708

709 L4+ developmental rate assays. Young adult animals that were grown on NGM agar plates  
710 seeded with *E. coli* HB101 were collected and transferred to new plates seeded with *E. coli*  
711 HB101, *Pseudomonas sp.* 15C5, *S. plymuthica* BUR1537, or *Aeromonas sp.* BIGb0469.  
712 Animals were grown for 24 hours at room temperature (22°C). Embryos from these animals  
713 were collected by bleaching and transferred to new plates seeded with 1 mL of *E. coli* HB101  
714 *Pseudomonas sp.* 15C5, *S. plymuthica* BUR1537, or *Aeromonas sp.* BIGb0469. Percent of  
715 animals that reached the L4 larval stage was scored after either 48 hours or 72 hours at 22°C.

716

717 Identification of *Pseudomonas sp.* 15C5 and *S. plymuthica* BUR1537. Samples of rotting fruit  
718 and vegetation were collected from around Cambridge (UK) in 50 mL vials. For isolation of  
719 wild bacteria, the samples were homogenized and resuspended in M9 and plated on LB Agar,



720 Nutrient Agar, or Actinomycete Isolation Agar plates and grown at either 37°C or 30°C for 24  
721 hours. Single colonies were isolated from the plates and grown in LB or Nutrient Broth at the  
722 same temperature overnight. Stocks were frozen and stored at -80 °C in 20% glycerol. 1,537  
723 total isolates were obtained and frozen. *C. elegans* embryos were placed onto NGM agar plates  
724 seeded with each of the 1,537 bacterial isolates. Bacterial isolates that caused substantial delays  
725 in animal development or lethality were further analyzed for isolates where parental exposure  
726 to the isolate for 24 hours modified offspring phenotype when compared to offspring from  
727 parents fed the normal laboratory diet of *E. coli* HB101. Bacterial genus and species were  
728 identified by 16S rRNA profiling and sequencing.

729

730 RNAi in *C. kamaaina*. dsDNA corresponding to the *C. kamaaina* orthologues of *cysl-1*, *rhy-1*,  
731 *mek-2* and *gpdh-2* was synthesized and cloned into the L4440 vector by GENEWIZ (Takeley,  
732 UK). Vectors were transformed in *E. coli* HT115. *C. kamaaina* embryos were collected by  
733 bleaching and placed onto NGM agar plates containing 1 mM IPTG that were seeded with *E.*  
734 *coli* HT115 transformed with either the L4440 empty vector or each of the new vectors and  
735 grown at room temperature (22°C) for 48 hours. After 48 hours animals were transferred to  
736 new 50 mM NaCl control plates seeded with *E. coli* HB101, 300 mM NaCl plates seeded with  
737 *E. coli* HB101, or 50 mM NaCl control plates seeded with *P. vranovensis* BIGb0446. Animals  
738 were grown for 24 hours at room temperature (22 °C). Embryos from these animals were  
739 collected by bleaching and transferred to new 500 mM NaCl plates seeded with *E. coli* HB101  
740 or 50 mM NaCl plates seeded with *P. vranovensis* BIGb0446. Percent of animals developing  
741 or surviving was scored after 24 hours at room temperature as previously described in Burton  
742 et al., 2017 and Burton et al., 2020.

743

744 Statistics and reproducibility. Sample sizes for experiments involving *C. elegans* were selected  
745 based on similar studies from the literature and all animals from each genotype and condition  
746 were selected and analyzed randomly. All replicate numbers listed in figure legends represent  
747 biological replicates of independent animals cultured separately, collected separately, and  
748 analyzed separately. Unpaired two-tailed Student's *t*-test was used for Fig. 1B, 1D, 1F, 2E, 2J,  
749 4C, 4D, and Supplemental Fig. 2. Two-way ANOVA was used for Fig. 1C, 1E, 3A-G, and  
750 Supplemental Fig. 1. One-way ANOVA was used for Fig. 4A, 4B, and Supplemental Fig. 3. \*  
751 =  $P < 0.05$ , \*\* =  $P < 0.01$ , \*\*\* =  $P < 0.001$ , \*\*\*\* $P < 0.0001$ . The experiments were not randomized.  
752 The investigators were not blinded to allocation during experiments and outcome assessment.  
753 Source data for all graphs can be found in the Source Data Supplemental Table.

754

## 755 **References**

756

- 757 Agrawal AA, Laforsch C, Tollrian R. 1999. Transgenerational induction of defences in  
758 animals and plants. *Nature* **401**:60–63. doi:10.1038/43425
- 759 Boeck ME, Huynh C, Gevirtzman L, Thompson OA, Wang G, Kasper DM, Reinke V, Hillier  
760 LW, Waterston RH. 2016. The time-resolved transcriptome of *C. elegans*. *Genome*  
761 *Res* **26**:1441–1450. doi:10.1101/gr.202663.115
- 762 Bozler J, Kacsoh BZ, Bosco G. 2019. Transgenerational inheritance of ethanol preference is  
763 caused by maternal NPF repression. *eLife* **8**:e45391. doi:10.7554/eLife.45391
- 764 Buckley BA, Burkhart KB, Gu SG, Spracklin G, Kershner A, Fritz H, Kimble J, Fire A,  
765 Kennedy S. 2012. A nuclear Argonaute promotes multigenerational epigenetic  
766 inheritance and germline immortality. *Nature* **489**:447–451. doi:10.1038/nature11352
- 767 Burton NO, Furuta T, Webster AK, Kaplan REW, Baugh LR, Arur S, Horvitz HR. 2017.  
768 Insulin-like signalling to the maternal germline controls progeny response to osmotic  
769 stress. *Nat Cell Biol* **19**:252–257. doi:10.1038/ncb3470
- 770 Burton NO, Riccio C, Dallaire A, Price J, Jenkins B, Koulman A, Miska EA. 2020. Cysteine  
771 synthases CYSL-1 and CYSL-2 mediate *C. elegans* heritable adaptation to *P.*  
772 *varanovensis* infection. *Nat Commun* **11**:1741. doi:10.1038/s41467-020-15555-8
- 773 Chen S, Zhou Y, Chen Y, Gu J. 2018. fastp: an ultra-fast all-in-one FASTQ preprocessor.  
774 *Bioinforma Oxf Engl* **34**:i884–i890. doi:10.1093/bioinformatics/bty560
- 775 Cutter AD. 2008. Divergence Times in *Caenorhabditis* and *Drosophila* Inferred from Direct  
776 Estimates of the Neutral Mutation Rate. *Mol Biol Evol* **25**:778–786.  
777 doi:10.1093/molbev/msn024

- 778 Dantzer B, Newman AEM, Boonstra R, Palme R, Boutin S, Humphries MM, McAdam AG.  
779 2013. Density Triggers Maternal Hormones That Increase Adaptive Offspring Growth  
780 in a Wild Mammal. *Science* **340**:1215. doi:10.1126/science.1235765
- 781 de Gusmão Correia ML, Volpato AM, Águila MB, Mandarim-de-Lacerda CA. 2012.  
782 Developmental origins of health and disease: experimental and human evidence of  
783 fetal programming for metabolic syndrome. *J Hum Hypertens* **26**:405–419.  
784 doi:10.1038/jhh.2011.61
- 785 Dias BG, Ressler KJ. 2014. Parental olfactory experience influences behavior and neural  
786 structure in subsequent generations. *Nat Neurosci* **17**:89–96. doi:10.1038/nn.3594
- 787 Dobin A, Davis CA, Schlesinger F, Drenkow J, Zaleski C, Jha S, Batut P, Chaisson M,  
788 Gingeras TR. 2013. STAR: ultrafast universal RNA-seq aligner. *Bioinformatics*  
789 **29**:15–21. doi:10.1093/bioinformatics/bts635
- 790 Emms DM, Kelly S. 2019. OrthoFinder: phylogenetic orthology inference for comparative  
791 genomics. *Genome Biol* **20**:238. doi:10.1186/s13059-019-1832-y
- 792 Greer EL, Maures TJ, Ucar D, Hauswirth AG, Mancini E, Lim JP, Benayoun BA, Shi Y,  
793 Brunet A. 2011. Transgenerational epigenetic inheritance of longevity in  
794 *Caenorhabditis elegans*. *Nature* **479**:365–371. doi:10.1038/nature10572
- 795 Hales CN, Barker DJP. 2001. The thrifty phenotype hypothesis: Type 2 diabetes. *Br Med*  
796 *Bull* **60**:5–20. doi:10.1093/bmb/60.1.5
- 797 Hales CN, Barker DJP. 1992. Type 2 (non-insulin-dependent) diabetes mellitus: the thrifty  
798 phenotype hypothesis. *Diabetologia* **35**:595–601. doi:10.1007/BF00400248
- 799 Harris TW, Arnaboldi V, Cain S, Chan J, Chen WJ, Cho J, Davis P, Gao S, Grove CA,  
800 Kishore R, Lee RYN, Muller H-M, Nakamura C, Nuin P, Paulini M, Raciti D,  
801 Rodgers FH, Russell M, Schindelman G, Auken KV, Wang Q, Williams G, Wright  
802 AJ, Yook K, Howe KL, Schedl T, Stein L, Sternberg PW. 2020. WormBase: a  
803 modern Model Organism Information Resource. *Nucleic Acids Res* **48**:D762–D767.  
804 doi:10.1093/nar/gkz920
- 805 Hellberg JEEU, Matilla MA, Salmond GPC. 2015. The broad-spectrum antibiotic, zeamine,  
806 kills the nematode worm *Caenorhabditis elegans*. *Front Microbiol* **6**:137–137.  
807 doi:10.3389/fmicb.2015.00137
- 808 Hibshman JD, Hung A, Baugh LR. 2016. Maternal Diet and Insulin-Like Signaling Control  
809 Intergenerational Plasticity of Progeny Size and Starvation Resistance. *PLoS Genet*  
810 **12**:e1006396–e1006396. doi:10.1371/journal.pgen.1006396
- 811 Hourii-Zeevi L, Korem Kohanim Y, Antonova O, Rechavi O. 2020. Three Rules Explain  
812 Transgenerational Small RNA Inheritance in *C. elegans*. *Cell* **182**:1186–1197.e12.  
813 doi:10.1016/j.cell.2020.07.022
- 814 Jacques Dainat, Darío Hereñú, Pascal Pucholt. 2021. NBISweden/AGAT: AGAT-v0.6.2.
- 815 Jordan JM, Hibshman JD, Webster AK, Kaplan REW, Leinroth A, Guzman R, Maxwell CS,  
816 Chitrakar R, Bowman EA, Fry AL, Hubbard EJA, Baugh LR. 2019. Insulin/IGF  
817 Signaling and Vitellogenin Provisioning Mediate Intergenerational Adaptation to  
818 Nutrient Stress. *Curr Biol* **29**:2380–2388.e5.  
819 doi:https://doi.org/10.1016/j.cub.2019.05.062
- 820 Kaletsky R, Moore RS, Vrla GD, Parsons LR, Gitai Z, Murphy CT. 2020. *C. elegans*  
821 interprets bacterial non-coding RNAs to learn pathogenic avoidance. *Nature* **586**:445–  
822 451. doi:10.1038/s41586-020-2699-5
- 823 Kishimoto S, Uno M, Okabe E, Nono M, Nishida E. 2017. Environmental stresses induce  
824 transgenerationally inheritable survival advantages via germline-to-soma

- 825 communication in *Caenorhabditis elegans*. *Nat Commun* **8**:14031.  
826 doi:10.1038/ncomms14031
- 827 Klosin A, Casas E, Hidalgo-Carcedo C, Vavouri T, Lehner B. 2017. Transgenerational  
828 transmission of environmental information in *C. elegans*. *Science*  
829 **356**:320. doi:10.1126/science.aah6412
- 830 Lamitina T, Huang CG, Strange K. 2006. Genome-wide RNAi screening identifies protein  
831 damage as a regulator of osmoprotective gene expression. *Proc Natl Acad Sci U S A*  
832 **103**:12173–12178. doi:10.1073/pnas.0602987103
- 833 Langley-Evans SC. 2006. Developmental programming of health and disease. *Proc Nutr Soc*  
834 **65**:97–105. doi:10.1079/pns2005478
- 835 Liao Y, Smyth GK, Shi W. 2014. featureCounts: an efficient general purpose program for  
836 assigning sequence reads to genomic features. *Bioinformatics* **30**:923–930.  
837 doi:10.1093/bioinformatics/btt656
- 838 Love MI, Huber W, Anders S. 2014. Moderated estimation of fold change and dispersion for  
839 RNA-seq data with DESeq2. *Genome Biol* **15**:550. doi:10.1186/s13059-014-0550-8
- 840 Luna E, Bruce TJA, Roberts MR, Flors V, Ton J. 2012. Next-generation systemic acquired  
841 resistance. *Plant Physiol* **158**:844–853. doi:10.1104/pp.111.187468
- 842 Ma C, Niu R, Huang T, Shao L-W, Peng Y, Ding W, Wang Y, Jia G, He C, Li C-Y, He A,  
843 Liu Y. 2019. N6-methyldeoxyadenine is a transgenerational epigenetic signal for  
844 mitochondrial stress adaptation. *Nat Cell Biol* **21**:319–327. doi:10.1038/s41556-018-  
845 0238-5
- 846 Moore BT, Jordan JM, Baugh LR. 2013. WormSizer: high-throughput analysis of nematode  
847 size and shape. *PLoS One* **8**:e57142–e57142. doi:10.1371/journal.pone.0057142
- 848 Moore RS, Kaletsky R, Murphy CT. 2019. Piwi/PRG-1 Argonaute and TGF- $\beta$  Mediate  
849 Transgenerational Learned Pathogenic Avoidance. *Cell* **177**:1827-1841.e12.  
850 doi:<https://doi.org/10.1016/j.cell.2019.05.024>
- 851 Öst A, Lempradl A, Casas E, Weigert M, Tiko T, Deniz M, Pantano L, Boenisch U, Itskov  
852 PM, Stoeckius M, Ruf M, Rajewsky N, Reuter G, Iovino N, Ribeiro C, Alenius M,  
853 Heyne S, Vavouri T, Pospisilik JA. 2014. Paternal Diet Defines Offspring Chromatin  
854 State and Intergenerational Obesity. *Cell* **159**:1352–1364.  
855 doi:10.1016/j.cell.2014.11.005
- 856 Palominos MF, Verdugo L, Gabaldon C, Pollak B, Ortíz-Severín J, Varas MA, Chávez FP,  
857 Calixto A. 2017. Transgenerational Diapause as an Avoidance Strategy against  
858 Bacterial Pathogens in *Caenorhabditis elegans*. *mBio* **8**:e01234-17.  
859 doi:10.1128/mBio.01234-17
- 860 Posner R, Toker IA, Antonova O, Star E, Anava S, Azmon E, Hendricks M, Bracha S,  
861 Gingold H, Rechavi O. 2019. Neuronal Small RNAs Control Behavior  
862 Transgenerationally. *Cell* **177**:1814-1826.e15.  
863 doi:<https://doi.org/10.1016/j.cell.2019.04.029>
- 864 Rohlfsing A-K, Miteva Y, Moronetti L, He L, Lamitina T. 2011. The *Caenorhabditis elegans*  
865 mucin-like protein OSM-8 negatively regulates osmosensitive physiology via the  
866 transmembrane protein PTR-23. *PLoS Genet* **7**:e1001267–e1001267.  
867 doi:10.1371/journal.pgen.1001267
- 868 Samuel BS, Rowedder H, Braendle C, Félix M-A, Ruvkun G. 2016. *Caenorhabditis elegans*  
869 responses to bacteria from its natural habitats. *Proc Natl Acad Sci U S A* **113**:E3941–  
870 E3949. doi:10.1073/pnas.1607183113
- 871 Schindelin J, Arganda-Carreras I, Frise E, Kaynig V, Longair M, Pietzsch T, Preibisch S,  
872 Rueden C, Saalfeld S, Schmid B, Tinevez J-Y, White DJ, Hartenstein V, Eliceiri K,

- 873 Tomancak P, Cardona A. 2012. Fiji: an open-source platform for biological-image  
874 analysis. *Nat Methods* **9**:676–682. doi:10.1038/nmeth.2019
- 875 Schulz LC. 2010. The Dutch Hunger Winter and the developmental origins of health and  
876 disease. *Proc Natl Acad Sci* **107**:16757. doi:10.1073/pnas.1012911107
- 877 Simão FA, Waterhouse RM, Ioannidis P, Kriventseva EV, Zdobnov EM. 2015. BUSCO:  
878 assessing genome assembly and annotation completeness with single-copy orthologs.  
879 *Bioinformatics* **31**:3210–3212. doi:10.1093/bioinformatics/btv351
- 880 Uller T. 2008. Developmental plasticity and the evolution of parental effects. *Trends Ecol*  
881 *Evol* **23**:432–438. doi:10.1016/j.tree.2008.04.005
- 882 Uller T, English S, Pen I. 2015. When is incomplete epigenetic resetting in germ cells  
883 favoured by natural selection? *Proc R Soc B Biol Sci* **282**:20150682.  
884 doi:10.1098/rspb.2015.0682
- 885 Veenendaal M, Painter R, de Rooij S, Bossuyt P, van der Post J, Gluckman P, Hanson M,  
886 Roseboom T. 2013. Transgenerational effects of prenatal exposure to the 1944–45  
887 Dutch famine. *BJOG Int J Obstet Gynaecol* **120**:548–554. doi:10.1111/1471-  
888 0528.12136
- 889 Vellichirammal NN, Gupta P, Hall TA, Brisson JA. 2017. Ecdysone signaling underlies the  
890 pea aphid transgenerational wing polyphenism. *Proc Natl Acad Sci* **114**:1419.  
891 doi:10.1073/pnas.1617640114
- 892 Webster AK, Jordan JM, Hibshman JD, Chitrakar R, Baugh LR. 2018. Transgenerational  
893 Effects of Extended Dauer Diapause on Starvation Survival and Gene Expression  
894 Plasticity in *Caenorhabditis elegans*. *Genetics* **210**:263–274.  
895 doi:10.1534/genetics.118.301250
- 896 Wibowo A, Becker C, Marconi G, Durr J, Price J, Haggmann J, Papareddy R, Putra H,  
897 Kageyama J, Becker J, Weigel D, Gutierrez-Marcos J. 2016. Hyperosmotic stress  
898 memory in *Arabidopsis* is mediated by distinct epigenetically labile sites in the  
899 genome and is restricted in the male germline by DNA glycosylase activity. *eLife*  
900 **5**:e13546. doi:10.7554/eLife.13546
- 901 Willis AR, Zhao W, Sukhdeo R, Wadi L, El Jarkass HT, Claycomb JM, Reinke AW. 2021. A  
902 parental transcriptional response to microsporidia infection induces inherited  
903 immunity in offspring. *Sci Adv* **7**:eabf3114. doi:10.1126/sciadv.abf3114
- 904 Zhang G, Sachse M, Prevost M-C, Luallen RJ, Troemel ER, Félix M-A. 2016. A Large  
905 Collection of Novel Nematode-Infecting Microsporidia and Their Diverse  
906 Interactions with *Caenorhabditis elegans* and Other Related Nematodes. *PLoS Pathog*  
907 **12**:e1006093–e1006093. doi:10.1371/journal.ppat.1006093
- 908

909 **Data availability:** RNA-seq data that support the findings of this study have been deposited at  
910 NCBI GEO and are available under the accession code GSE173987.

911

912 **Acknowledgments:** We would like to thank Buck Samuel and Marie-Anne Felix for bacterial  
913 isolates. We also thank Matt Rockman and Luke Noble for pre-publication access to the genome

914 of *C. kamaaina*. We would also like to thank Marie-Anne Felix and and the *Caenorhabditis*  
915 Genetic Center, which is funded by the NIH National Center for Research Resources (NCRR),  
916 for *Caenorhabditis* strains. N.O.B. is funded by a Next Generation Fellowship from the Centre  
917 for Trophoblast Research. K.F. and L.R.B. were funded by the National Institutes of Health  
918 (GM117408, L.R.B). A.W. and A.R. were funded by the Natural Sciences and Engineering  
919 Research Council of Canada (Grant #522691522691) and an Alfred P. Sloan Research  
920 Fellowship FG2019-12040 (to A.W.R.). This work was also supported by Cancer Research UK  
921 (C13474/A18583, C6946/A14492) and the Wellcome Trust (104640/Z/14/Z, 092096/Z/10/Z)  
922 grants to E.A.M.

923

924 **Author Contributions:** N.O.B., A.W., A.R., K.F., and L.R.B. designed the experiments. N.O.B.,  
925 A.W., J.P., F.B., L.S., K.F., A.R., L.R.B, and E.A.M analysed the data. N.O.B., A.W., K.F., and  
926 F.B. performed the experiments. N.O.B. conceived the project and wrote the manuscript.

927

928 **Declarations of Interest:** The authors declare that they have no competing interests.

929

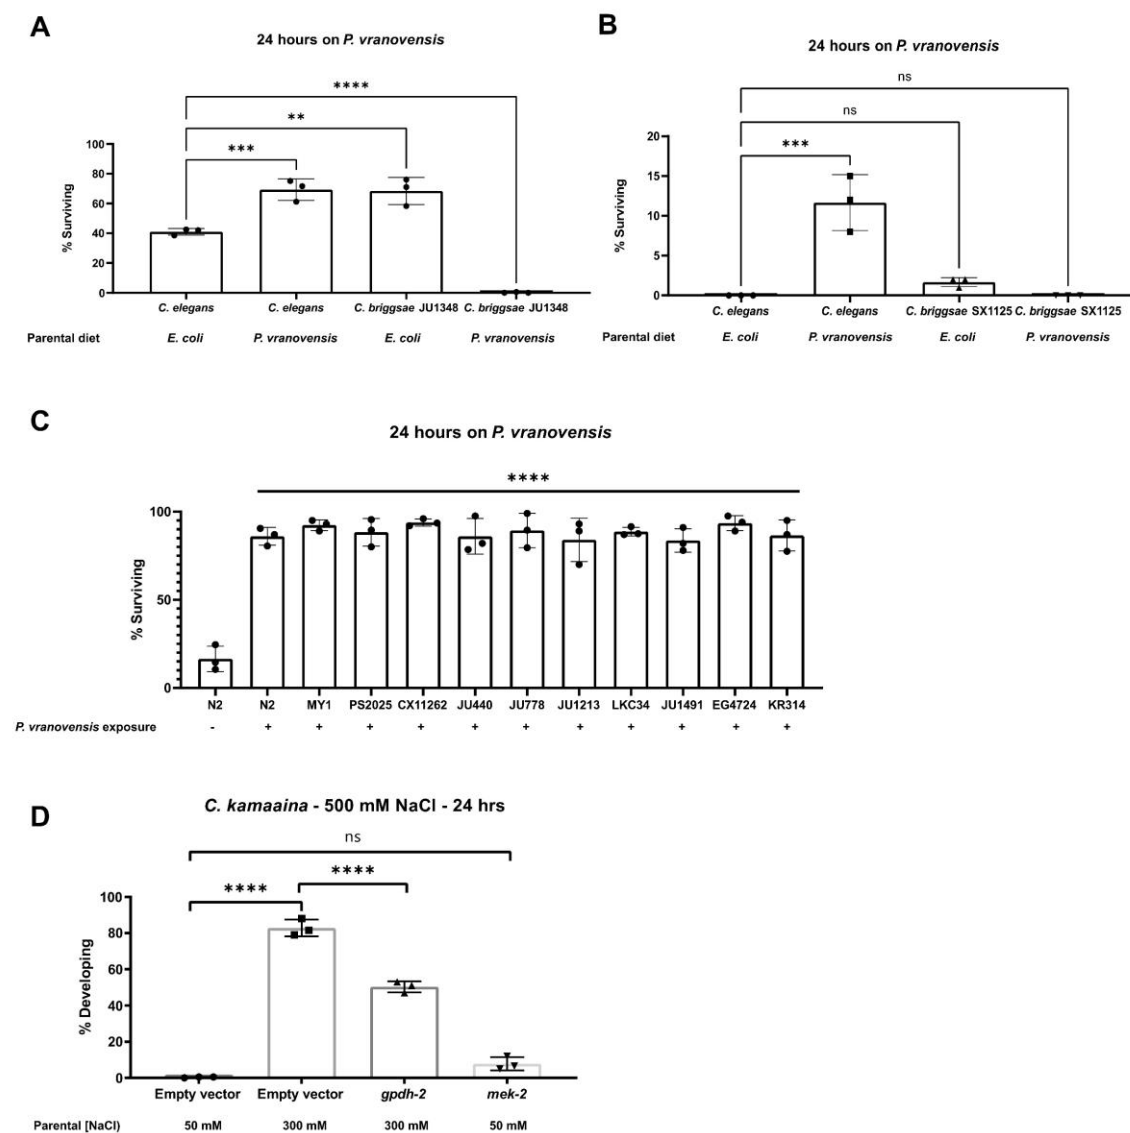

931

Supplemental Figure 1. Intergenerational responses to environmental stress are conserved in wild isolates of *Caenorhabditis* species. (a) Percent of wild-type *C. elegans* (N2) and *C. briggsae* (JU1348) animals surviving after 24 hours on plates seeded with *P. vranovensis* BIGb0446. Data presented as mean values  $\pm$  s.d.  $n = 3$  experiments of  $>100$  animals. (b) Percent of wild-type *C. elegans* (N2) and *C. briggsae* (SX1125) animals surviving after 24 hours on plates seeded with *P. vranovensis* BIGb0446. Data presented as mean values  $\pm$  s.d.  $n = 3$  experiments of  $>100$  animals. (c) Percent of wild-type *C. elegans* isolates surviving after 24 hours on plates seeded with *P. vranovensis* BIGb0446. Data presented as mean values  $\pm$  s.d.  $n = 3$  experiments of  $>100$  animals. (d) Percent of wild-type *C. kamaaina* animals mobile and developing at 500 mM NaCl after 24 hours. Data presented as mean values  $\pm$  s.d.  $n = 3$  experiments of  $>100$  animals.

932

933

934

935

936

937

938

939

940



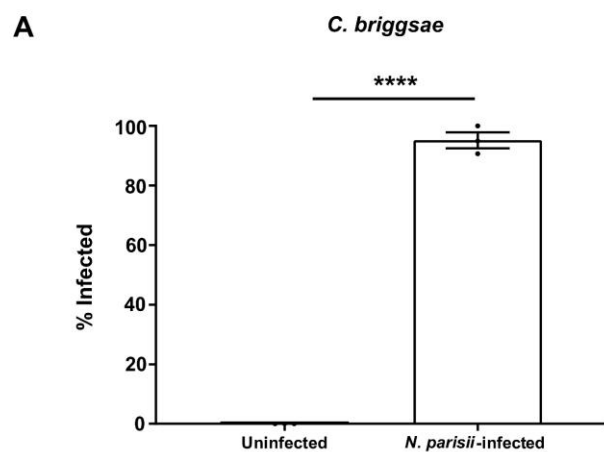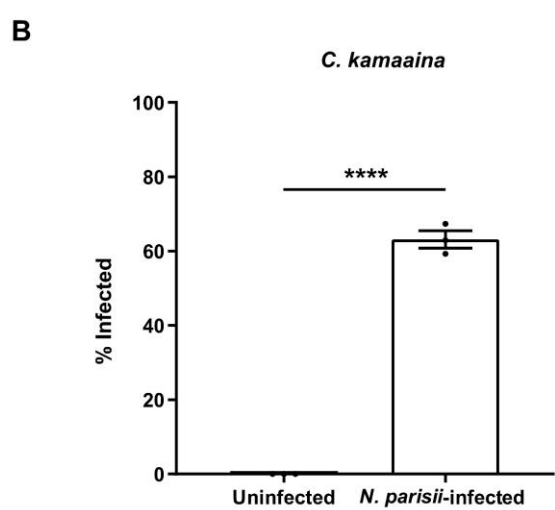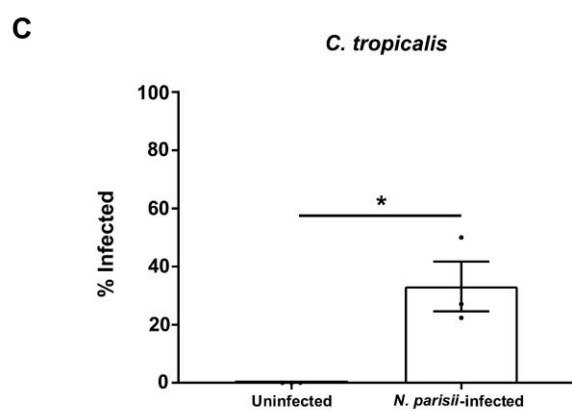

942

Supplemental Figure 2. *N. parisii* infects *C. briggsae*, *C. kamaaina*, and *C. tropicalis*. *N. parisii* infects *C. briggsae*, *C. kamaaina*, and *C. tropicalis*. Percent of animals exhibiting detectable infection by *N. parisii* as determined by DY96 staining after 72 h for *C. elegans* and *C. briggsae*, or 96 h for *C. kamaaina* and *C. tropicalis*. Data presented as mean values  $\pm$  s.e.m.  $n = 3$  experiments of 68-115 animals (1A), 27-102 animals (1B), 38-104 animals (1C).

943

944

945

946

947

948

949

950

951

952

953

954

955

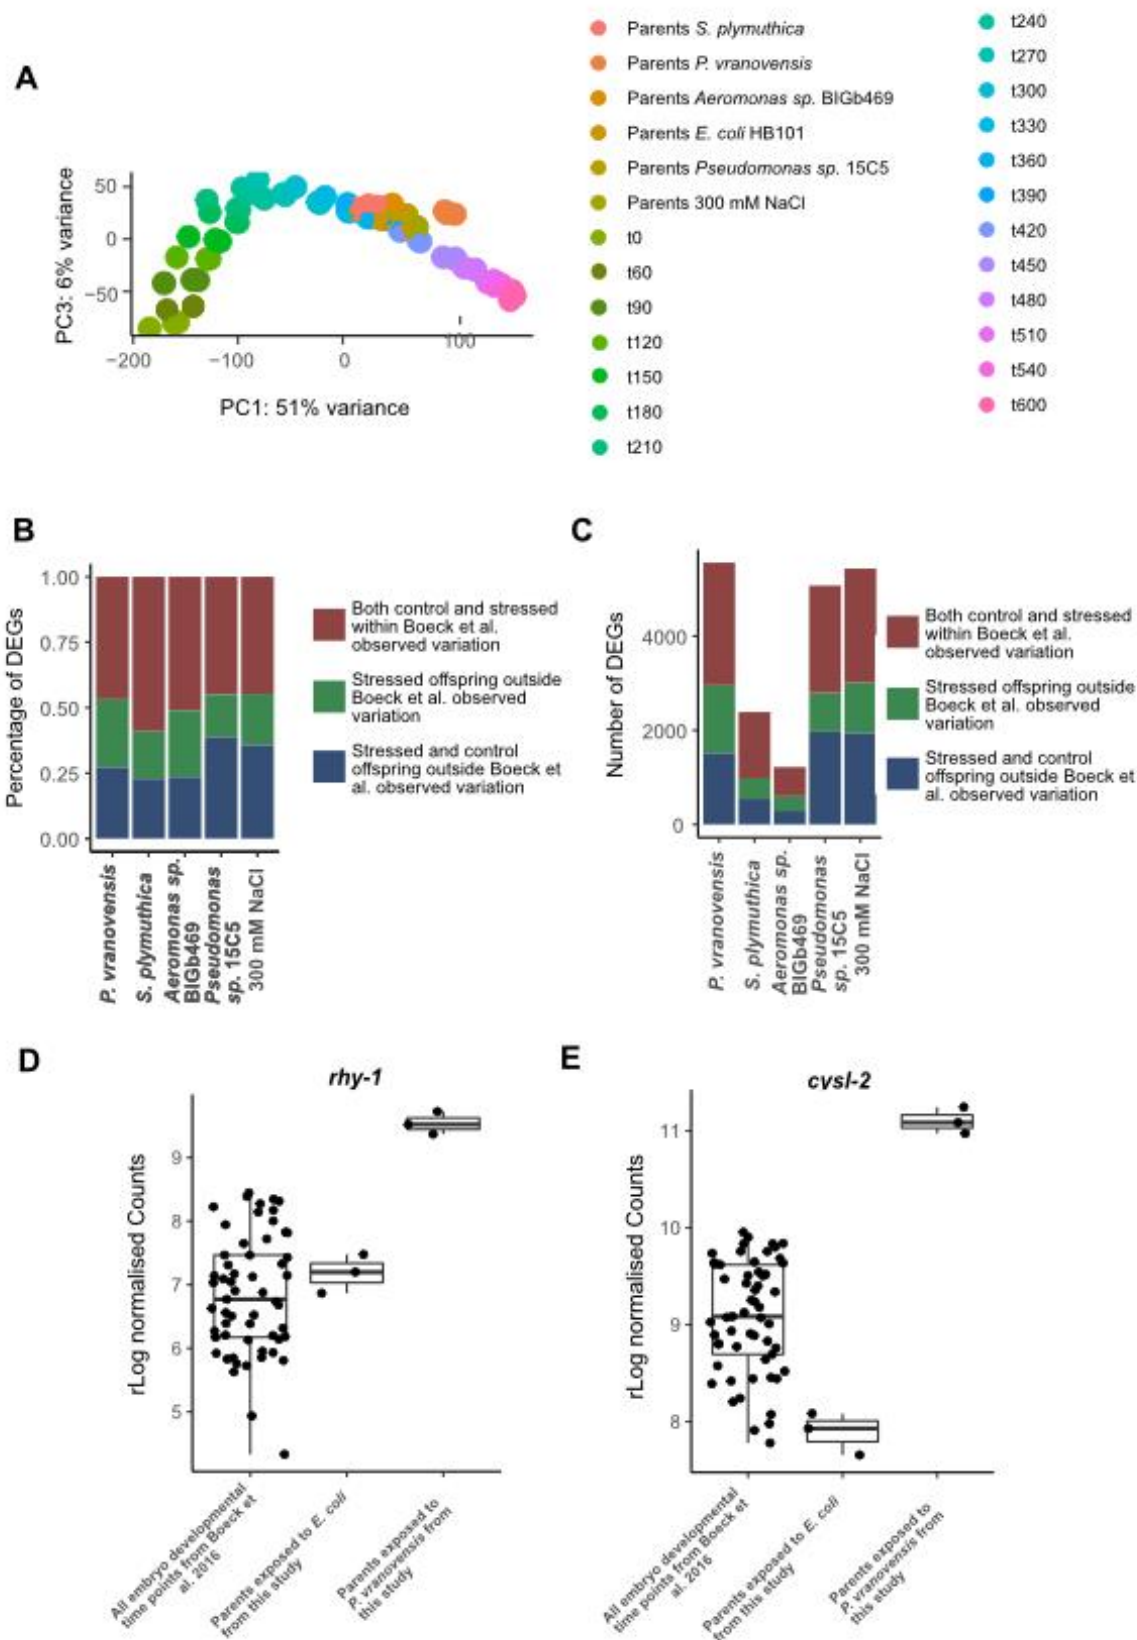

956

957

958

Supplemental Figure 3. Differences in developmental timing are insufficient to explain a majority of the observed differences in gene expression in the offspring of stressed parents. (A) PCA of gene expression from Boeck et al. (2016) compared to RNA-seq data reported in the study. Time points of development are in minutes, t60 = 60 minutes post fertilization. (B) Percentage of genes differentially expressed in the offspring of parents exposed to different stresses that exhibit DESeq2 normalized counts that fall within or outside one standard deviation of the average normalized counts observed throughout all developmental timepoints from Boeck et al. (2016). (C) Total number of genes differentially expressed in the offspring of parents exposed to different stresses that exhibit DESeq2 normalized counts that fall within or outside one standard deviation of the average normalized counts observed throughout all developmental timepoints from Boeck et al. (2016). (D) *rhy-1* normalized counts from all time points during development from Boeck et al. (2016), the offspring of parents exposed to *E. coli* HB101 (this study), or the offspring of parents exposed to *P. vranovensis* (this study). (E) *cysl-2* normalized counts from all time points during development from Boeck et al. (2016), the offspring of parents exposed to *E. coli* HB101 (this study), or the offspring of parents exposed to *P. vranovensis* (this study).

959

960

961

962

963

964

965

966

967

968

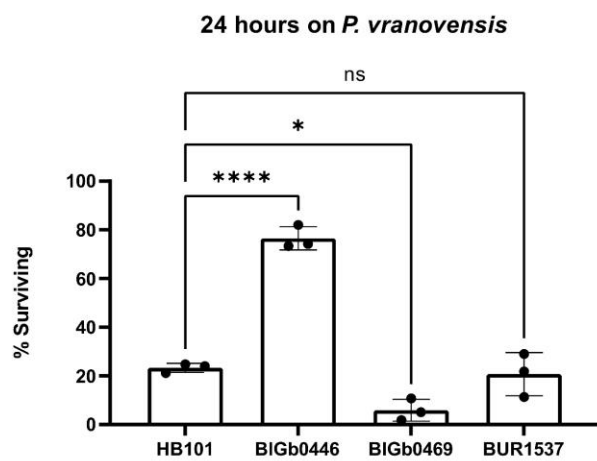

970

Supplemental Figure 4. Parental exposure to *Aeromonas sp.* BIGb0469 and *S. plymuthica* BUR1537 does not protect offspring from *P. vranovensis*. Percent of wild-type *C. elegans* (N2) animals surviving after 24 hours on plates seeded with *P. vranovensis* BIGb0446. Data presented as mean values  $\pm$  s.d.  $n = 3$  experiments of  $>100$  animals.
