# Supplementary material for: Intergenerational adaptations to stress are evolutionarily conserved, stress-specific, and have deleterious trade-offs
Source: bioRxiv preprint, doi:10.1101/2021.05.07.443118, version 1 (2021-05-08)
Supplement: Supplemental Table 1 [file 443118_file03.xlsx]

## Sheet: Single Copy Orthologs
group	CKAMA	CBRIG	CELEG	CTROP
OG0003683	CKAMA.g15867	CBRIG.CBG02872	CELEG.B0334.5	CTROP.Csp11.Scaffold554.g3696
OG0003684	CKAMA.g15870	CBRIG.CBG02782	CELEG.ZK970.8	CTROP.Csp11.Scaffold629.g7845
OG0003685	CKAMA.g15871	CBRIG.CBG25605	CELEG.F29C12.6	CTROP.Csp11.Scaffold629.g7843
OG0003686	CKAMA.g15882	CBRIG.CBG13948	CELEG.C09E9.1	CTROP.Csp11.Scaffold630.g20856
OG0003687	CKAMA.g7963	CBRIG.CBG00615	CELEG.M05D6.7	CTROP.Csp11.Scaffold630.g21360
OG0003688	CKAMA.g7964	CBRIG.CBG00616	CELEG.M05D6.6	CTROP.Csp11.Scaffold630.g21359
OG0003689	CKAMA.g7966	CBRIG.CBG00618	CELEG.M05D6.4	CTROP.Csp11.Scaffold630.g21362
OG0003690	CKAMA.g7967	CBRIG.CBG00574	CELEG.W01C9.3	CTROP.Csp11.Scaffold630.g21336
OG0003691	CKAMA.g7968	CBRIG.CBG00573	CELEG.T05C12.1	CTROP.Csp11.Scaffold491.g2095
OG0003692	CKAMA.g7970	CBRIG.CBG00571	CELEG.W01C9.5	CTROP.Csp11.Scaffold630.g21348
OG0003693	CKAMA.g7972	CBRIG.CBG00565	CELEG.F54C9.14	CTROP.Csp11.Scaffold630.g21350
OG0003694	CKAMA.g7973	CBRIG.CBG00564	CELEG.F54C9.2	CTROP.Csp11.Scaffold630.g21351
OG0003695	CKAMA.g7974	CBRIG.CBG00561	CELEG.F54C9.5	CTROP.Csp11.Scaffold630.g21354
OG0003696	CKAMA.g7975	CBRIG.CBG00560	CELEG.F54C9.6	CTROP.Csp11.Scaffold630.g21355
OG0003697	CKAMA.g7976	CBRIG.CBG00558	CELEG.F54C9.9	CTROP.Csp11.Scaffold562.g3929
OG0003698	CKAMA.g7977	CBRIG.CBG00557	CELEG.F54C9.10	CTROP.Csp11.Scaffold562.g3930
OG0003699	CKAMA.g7978	CBRIG.CBG00556	CELEG.F54C9.11	CTROP.Csp11.Scaffold562.g3931
OG0003700	CKAMA.g7980	CBRIG.CBG00550	CELEG.F28C6.4	CTROP.Csp11.Scaffold562.g3924
OG0003701	CKAMA.g7981	CBRIG.CBG00549	CELEG.F28C6.5	CTROP.Csp11.Scaffold562.g3923
OG0003702	CKAMA.g7982	CBRIG.CBG00548	CELEG.F28C6.3	CTROP.Csp11.Scaffold562.g3922
OG0003703	CKAMA.g7983	CBRIG.CBG00547	CELEG.F28C6.7	CTROP.Csp11.Scaffold562.g3921
OG0003704	CKAMA.g7984	CBRIG.CBG00546	CELEG.F28C6.6	CTROP.Csp11.Scaffold562.g3920
OG0003705	CKAMA.g7986	CBRIG.CBG00536	CELEG.T22C8.1	CTROP.Csp11.Scaffold562.g3926
OG0003706	CKAMA.g7987	CBRIG.CBG00535	CELEG.T22C8.2	CTROP.Csp11.Scaffold562.g3917
OG0003707	CKAMA.g7989	CBRIG.CBG00530	CELEG.T22C8.6	CTROP.Csp11.Scaffold562.g3914
OG0003708	CKAMA.g7990	CBRIG.CBG00529	CELEG.T22C8.7	CTROP.Csp11.Scaffold629.g15077
OG0003709	CKAMA.g7991	CBRIG.CBG00522	CELEG.T22C8.8	CTROP.Csp11.Scaffold629.g15076
OG0003710	CKAMA.g7992	CBRIG.CBG00516	CELEG.D2085.7	CTROP.Csp11.Scaffold629.g15075
OG0003711	CKAMA.g7995	CBRIG.CBG00513	CELEG.D2085.6	CTROP.Csp11.Scaffold629.g15073
OG0003712	CKAMA.g7996	CBRIG.CBG00512	CELEG.D2085.3	CTROP.Csp11.Scaffold629.g15072
OG0003713	CKAMA.g7997	CBRIG.CBG00511	CELEG.D2085.4	CTROP.Csp11.Scaffold629.g15071
OG0003714	CKAMA.g7998	CBRIG.CBG11128	CELEG.D2085.5	CTROP.Csp11.Scaffold629.g15069
OG0003715	CKAMA.g7999	CBRIG.CBG11119	CELEG.C34C6.3	CTROP.Csp11.Scaffold629.g15066
OG0003717	CKAMA.g8007	CBRIG.CBG00871	CELEG.F42A8.3	CTROP.Csp11.Scaffold629.g15061
OG0003718	CKAMA.g8009	CBRIG.CBG20633	CELEG.R03D7.5	CTROP.Csp11.Scaffold629.g11263
OG0003719	CKAMA.g8010	CBRIG.CBG20634	CELEG.R03D7.4	CTROP.Csp11.Scaffold629.g11264
OG0003720	CKAMA.g8013	CBRIG.CBG20636	CELEG.R03D7.1	CTROP.Csp11.Scaffold629.g11267
OG0003721	CKAMA.g8014	CBRIG.CBG20645	CELEG.F44F4.4	CTROP.Csp11.Scaffold629.g11275
OG0003722	CKAMA.g8015	CBRIG.CBG20644	CELEG.F44F4.5	CTROP.Csp11.Scaffold629.g11276
OG0003723	CKAMA.g8016	CBRIG.CBG20642	CELEG.F44F4.6	CTROP.Csp11.Scaffold629.g11277
OG0003724	CKAMA.g8017	CBRIG.CBG20646	CELEG.F44F4.3	CTROP.Csp11.Scaffold629.g11274
OG0003725	CKAMA.g8018	CBRIG.CBG20647	CELEG.F44F4.2	CTROP.Csp11.Scaffold629.g11280
OG0003726	CKAMA.g8023	CBRIG.CBG20832	CELEG.W01G7.1	CTROP.Csp11.Scaffold630.g19497
OG0003727	CKAMA.g8024	CBRIG.CBG20834	CELEG.W01G7.3	CTROP.Csp11.Scaffold630.g19500
OG0003728	CKAMA.g8025	CBRIG.CBG20835	CELEG.W01G7.4	CTROP.Csp11.Scaffold630.g19499
OG0003729	CKAMA.g8026	CBRIG.CBG20836	CELEG.W01G7.5	CTROP.Csp11.Scaffold630.g19503
OG0003730	CKAMA.g8027	CBRIG.CBG20837	CELEG.Y39G8C.1	CTROP.Csp11.Scaffold630.g19504
OG0003731	CKAMA.g8029	CBRIG.CBG20829	CELEG.F01D5.9	CTROP.Csp11.Scaffold630.g19492
OG0003732	CKAMA.g8031	CBRIG.CBG20827	CELEG.F01D5.6	CTROP.Csp11.Scaffold630.g19494
OG0003733	CKAMA.g8037	CBRIG.CBG20630	CELEG.F09C12.8	CTROP.Csp11.Scaffold629.g11260
OG0003734	CKAMA.g8038	CBRIG.CBG20631	CELEG.R03D7.8	CTROP.Csp11.Scaffold629.g11261
OG0003735	CKAMA.g8039	CBRIG.CBG20968	CELEG.W05H5.3	CTROP.Csp11.Scaffold629.g9168
OG0003736	CKAMA.g8043	CBRIG.CBG03260	CELEG.T24B8.6	CTROP.Csp11.Scaffold629.g7515
OG0003737	CKAMA.g8044	CBRIG.CBG03262	CELEG.C07H4.2	CTROP.Csp11.Scaffold629.g7517
OG0003738	CKAMA.g8045	CBRIG.CBG03263	CELEG.T24H10.1	CTROP.Csp11.Scaffold629.g7518
OG0003739	CKAMA.g8046	CBRIG.CBG03264	CELEG.T24H10.6	CTROP.Csp11.Scaffold629.g7519
OG0003740	CKAMA.g8047	CBRIG.CBG03265	CELEG.T24H10.3	CTROP.Csp11.Scaffold629.g7520
OG0003741	CKAMA.g8048	CBRIG.CBG03266	CELEG.T24H10.4	CTROP.Csp11.Scaffold629.g7522
OG0003742	CKAMA.g8053	CBRIG.CBG03275	CELEG.DH11.5	CTROP.Csp11.Scaffold629.g7526
OG0003743	CKAMA.g8055	CBRIG.CBG03280	CELEG.ZK669.5	CTROP.Csp11.Scaffold629.g11685
OG0003744	CKAMA.g8056	CBRIG.CBG03281	CELEG.ZK669.4	CTROP.Csp11.Scaffold629.g11686
OG0003745	CKAMA.g8057	CBRIG.CBG03282	CELEG.ZK669.3	CTROP.Csp11.Scaffold629.g11687
OG0003746	CKAMA.g8059	CBRIG.CBG03285	CELEG.ZK669.2	CTROP.Csp11.Scaffold629.g11688
OG0003747	CKAMA.g8060	CBRIG.CBG03288	CELEG.ZK669.1	CTROP.Csp11.Scaffold629.g11691
OG0003748	CKAMA.g8061	CBRIG.CBG03287	CELEG.ZK675.4	CTROP.Csp11.Scaffold629.g11690
OG0003749	CKAMA.g8062	CBRIG.CBG03286	CELEG.ZK675.3	CTROP.Csp11.Scaffold629.g11689
OG0003750	CKAMA.g8063	CBRIG.CBG03293	CELEG.ZK675.2	CTROP.Csp11.Scaffold531.g3171
OG0003751	CKAMA.g8065	CBRIG.CBG03297	CELEG.T01H3.4	CTROP.Csp11.Scaffold531.g3169
OG0003752	CKAMA.g8066	CBRIG.CBG03299	CELEG.T01H3.2	CTROP.Csp11.Scaffold531.g3166
OG0003753	CKAMA.g8067	CBRIG.CBG03300	CELEG.T01H3.3	CTROP.Csp11.Scaffold531.g3164
OG0003754	CKAMA.g8068	CBRIG.CBG03301	CELEG.T09A5.12	CTROP.Csp11.Scaffold531.g3163
OG0003755	CKAMA.g8069	CBRIG.CBG03302	CELEG.T09A5.11	CTROP.Csp11.Scaffold531.g3162
OG0003756	CKAMA.g8072	CBRIG.CBG03307	CELEG.T09A5.7	CTROP.Csp11.Scaffold531.g3158
OG0003757	CKAMA.g8073	CBRIG.CBG03309	CELEG.T09A5.5	CTROP.Csp11.Scaffold531.g3156
OG0003758	CKAMA.g8074	CBRIG.CBG03310	CELEG.T09A5.3	CTROP.Csp11.Scaffold531.g3153
OG0003759	CKAMA.g8075	CBRIG.CBG03311	CELEG.T09A5.4	CTROP.Csp11.Scaffold531.g3154
OG0003760	CKAMA.g8076	CBRIG.CBG03312	CELEG.T09A5.2	CTROP.Csp11.Scaffold531.g3155
OG0003761	CKAMA.g8077	CBRIG.CBG12942	CELEG.T09A5.1	CTROP.Csp11.Scaffold504.g2403
OG0003762	CKAMA.g8080	CBRIG.CBG12951	CELEG.T05A6.1	CTROP.Csp11.Scaffold504.g2400
OG0003764	CKAMA.g8083	CBRIG.CBG12954	CELEG.C06A8.9	CTROP.Csp11.Scaffold504.g2399
OG0003765	CKAMA.g8084	CBRIG.CBG12956	CELEG.ZK666.8	CTROP.Csp11.Scaffold504.g2398
OG0003766	CKAMA.g8086	CBRIG.CBG19326	CELEG.C06A8.5	CTROP.Csp11.Scaffold504.g2395
OG0003767	CKAMA.g8087	CBRIG.CBG12959	CELEG.C06A8.2	CTROP.Csp11.Scaffold504.g2394
OG0003768	CKAMA.g8091	CBRIG.CBG12968	CELEG.B0228.7	CTROP.Csp11.Scaffold504.g2391
OG0003769	CKAMA.g8092	CBRIG.CBG12970	CELEG.B0228.1	CTROP.Csp11.Scaffold504.g2386
OG0003770	CKAMA.g8093	CBRIG.CBG03200	CELEG.T07D4.2	CTROP.Csp11.Scaffold630.g20693
OG0003771	CKAMA.g8094	CBRIG.CBG03199	CELEG.T07D4.1	CTROP.Csp11.Scaffold630.g20692
OG0003772	CKAMA.g8096	CBRIG.CBG03197	CELEG.T14D7.2	CTROP.Csp11.Scaffold630.g20691
OG0003773	CKAMA.g8097	CBRIG.CBG03194	CELEG.F46C5.6	CTROP.Csp11.Scaffold630.g20690
OG0003774	CKAMA.g8100	CBRIG.CBG03189	CELEG.F46C5.3	CTROP.Csp11.Scaffold630.g20686
OG0003775	CKAMA.g15891	CBRIG.CBG20744	CELEG.W07G1.3	CTROP.Csp11.Scaffold629.g10489
OG0003776	CKAMA.g15896	CBRIG.CBG12929	CELEG.ZC15.7	CTROP.Csp11.Scaffold629.g14749
OG0003777	CKAMA.g15909	CBRIG.CBG13902	CELEG.Y54G2A.11	CTROP.Csp11.Scaffold630.g20928
OG0003778	CKAMA.g8114	CBRIG.CBG02434	CELEG.F26D2.2	CTROP.Csp11.Scaffold629.g11376
OG0003780	CKAMA.g8117	CBRIG.CBG06671	CELEG.T15H9.3	CTROP.Csp11.Scaffold629.g8809
OG0003781	CKAMA.g8118	CBRIG.CBG24857	CELEG.ZK1307.6	CTROP.Csp11.Scaffold629.g8817
OG0003782	CKAMA.g8120	CBRIG.CBG01067	CELEG.ZK1307.5	CTROP.Csp11.Scaffold629.g8818
OG0003783	CKAMA.g8121	CBRIG.CBG01066	CELEG.ZK1307.9	CTROP.Csp11.Scaffold629.g8819
OG0003784	CKAMA.g15919	CBRIG.CBG05647	CELEG.Y59A8B.14	CTROP.Csp11.Scaffold630.g21876
OG0003785	CKAMA.g8126	CBRIG.CBG20748	CELEG.W02B8.5	CTROP.Csp11.Scaffold630.g19480
OG0003787	CKAMA.g8130	CBRIG.CBG30669	CELEG.D1025.3	CTROP.Csp11.Scaffold566.g4104
OG0003788	CKAMA.g8131	CBRIG.CBG07479	CELEG.M163.1	CTROP.Csp11.Scaffold629.g10085
OG0003789	CKAMA.g1107	CBRIG.CBG14172	CELEG.K09C4.8	CTROP.Csp11.Scaffold629.g16501
OG0003790	CKAMA.g1112	CBRIG.CBG14165	CELEG.F40F4.8	CTROP.Csp11.Scaffold629.g16507
OG0003791	CKAMA.g1115	CBRIG.CBG14158	CELEG.F28B4.2	CTROP.Csp11.Scaffold629.g16514
OG0003792	CKAMA.g1116	CBRIG.CBG14155	CELEG.F56E3.4	CTROP.Csp11.Scaffold629.g16515
OG0003793	CKAMA.g1117	CBRIG.CBG14150	CELEG.F56E3.3	CTROP.Csp11.Scaffold629.g16517
OG0003795	CKAMA.g1122	CBRIG.CBG14147	CELEG.C15C7.7	CTROP.Csp11.Scaffold629.g16521
OG0003796	CKAMA.g1123	CBRIG.CBG14145	CELEG.C15C7.5	CTROP.Csp11.Scaffold629.g16524
OG0003797	CKAMA.g1124	CBRIG.CBG14142	CELEG.C15C7.4	CTROP.Csp11.Scaffold629.g16527
OG0003798	CKAMA.g1125	CBRIG.CBG14140	CELEG.K10B3.1	CTROP.Csp11.Scaffold629.g16528
OG0003799	CKAMA.g1127	CBRIG.CBG14139	CELEG.K10B3.10	CTROP.Csp11.Scaffold629.g16531
OG0003800	CKAMA.g1128	CBRIG.CBG14138	CELEG.K10B3.9	CTROP.Csp11.Scaffold629.g16532
OG0003801	CKAMA.g1129	CBRIG.CBG14135	CELEG.K10B3.6	CTROP.Csp11.Scaffold629.g16535
OG0003802	CKAMA.g1130	CBRIG.CBG14134	CELEG.K10B3.5	CTROP.Csp11.Scaffold629.g16536
OG0003803	CKAMA.g1131	CBRIG.CBG14132	CELEG.F52E4.7	CTROP.Csp11.Scaffold629.g16538
OG0003804	CKAMA.g1132	CBRIG.CBG14131	CELEG.F52E4.6	CTROP.Csp11.Scaffold629.g16539
OG0003805	CKAMA.g1134	CBRIG.CBG14130	CELEG.F52E4.1	CTROP.Csp11.Scaffold629.g16540
OG0003806	CKAMA.g1135	CBRIG.CBG14129	CELEG.F52E4.5	CTROP.Csp11.Scaffold629.g16541
OG0003807	CKAMA.g1136	CBRIG.CBG14128	CELEG.F52E4.4	CTROP.Csp11.Scaffold629.g16542
OG0003808	CKAMA.g1137	CBRIG.CBG14126	CELEG.C33D12.1	CTROP.Csp11.Scaffold629.g16543
OG0003809	CKAMA.g1138	CBRIG.CBG14125	CELEG.C33D12.7	CTROP.Csp11.Scaffold629.g16544
OG0003810	CKAMA.g1139	CBRIG.CBG14124	CELEG.C33D12.6	CTROP.Csp11.Scaffold629.g16545
OG0003811	CKAMA.g1141	CBRIG.CBG14121	CELEG.C33D12.2	CTROP.Csp11.Scaffold629.g16547
OG0003812	CKAMA.g1142	CBRIG.CBG14118	CELEG.M02F4.7	CTROP.Csp11.Scaffold629.g16548
OG0003813	CKAMA.g1143	CBRIG.CBG14117	CELEG.M02F4.8	CTROP.Csp11.Scaffold629.g16549
OG0003814	CKAMA.g1144	CBRIG.CBG14115	CELEG.Y48D7A.2	CTROP.Csp11.Scaffold629.g16550
OG0003815	CKAMA.g1145	CBRIG.CBG17197	CELEG.C32A9.1	CTROP.Csp11.Scaffold629.g13705
OG0003816	CKAMA.g1148	CBRIG.CBG14100	CELEG.F49H12.6	CTROP.Csp11.Scaffold629.g16553
OG0003817	CKAMA.g1149	CBRIG.CBG14099	CELEG.F49H12.5	CTROP.Csp11.Scaffold629.g16563
OG0003818	CKAMA.g1150	CBRIG.CBG14096	CELEG.F49H12.3	CTROP.Csp11.Scaffold629.g16561
OG0003819	CKAMA.g1152	CBRIG.CBG14092	CELEG.T21D9.1	CTROP.Csp11.Scaffold629.g16556
OG0003820	CKAMA.g1154	CBRIG.CBG14087	CELEG.F53B1.3	CTROP.Csp11.Scaffold629.g16554
OG0003821	CKAMA.g1155	CBRIG.CBG14086	CELEG.F53B1.2	CTROP.Csp11.Scaffold629.g16564
OG0003823	CKAMA.g1158	CBRIG.CBG14082	CELEG.F53B1.7	CTROP.Csp11.Scaffold629.g16566
OG0003824	CKAMA.g1159	CBRIG.CBG14081	CELEG.F53B1.8	CTROP.Csp11.Scaffold629.g16567
OG0003825	CKAMA.g1161	CBRIG.CBG14072	CELEG.F48B9.4	CTROP.Csp11.Scaffold629.g16572
OG0003826	CKAMA.g1163	CBRIG.CBG14070	CELEG.F48B9.8	CTROP.Csp11.Scaffold629.g16574
OG0003827	CKAMA.g1164	CBRIG.CBG14068	CELEG.T24C12.2	CTROP.Csp11.Scaffold629.g16577
OG0003828	CKAMA.g1166	CBRIG.CBG14067	CELEG.T24C12.1	CTROP.Csp11.Scaffold629.g16579
OG0003829	CKAMA.g1168	CBRIG.CBG14059	CELEG.T14F9.4	CTROP.Csp11.Scaffold629.g16582
OG0003830	CKAMA.g1169	CBRIG.CBG14058	CELEG.T14F9.3	CTROP.Csp11.Scaffold576.g4474
OG0003831	CKAMA.g1170	CBRIG.CBG14057	CELEG.T14F9.5	CTROP.Csp11.Scaffold576.g4473
OG0003832	CKAMA.g1173	CBRIG.CBG14052	CELEG.AH9.1	CTROP.Csp11.Scaffold576.g4469
OG0003833	CKAMA.g1175	CBRIG.CBG02145	CELEG.AH9.4	CTROP.Csp11.Scaffold576.g4463
OG0003834	CKAMA.g1176	CBRIG.CBG02143	CELEG.T10H10.3	CTROP.Csp11.Scaffold576.g4462
OG0003835	CKAMA.g1177	CBRIG.CBG02142	CELEG.T10H10.2	CTROP.Csp11.Scaffold576.g4461
OG0003836	CKAMA.g1178	CBRIG.CBG02140	CELEG.T10H10.1	CTROP.Csp11.Scaffold576.g4459
OG0003837	CKAMA.g1179	CBRIG.CBG02139	CELEG.T01B6.3	CTROP.Csp11.Scaffold576.g4458
OG0003838	CKAMA.g1182	CBRIG.CBG26779	CELEG.T24D8.3	CTROP.Csp11.Scaffold576.g4454
OG0003839	CKAMA.g1184	CBRIG.CBG02133	CELEG.T24D8.4	CTROP.Csp11.Scaffold576.g4453
OG0003840	CKAMA.g1186	CBRIG.CBG02131	CELEG.T24D8.5	CTROP.Csp11.Scaffold576.g4452
OG0003841	CKAMA.g1187	CBRIG.CBG27510	CELEG.T01B6.1	CTROP.Csp11.Scaffold576.g4451
OG0003842	CKAMA.g1188	CBRIG.CBG02128	CELEG.T24D8.1	CTROP.Csp11.Scaffold576.g4450
OG0003843	CKAMA.g1191	CBRIG.CBG02118	CELEG.F47G3.1	CTROP.Csp11.Scaffold582.g4612
OG0003844	CKAMA.g1192	CBRIG.CBG02116	CELEG.C43H6.7	CTROP.Csp11.Scaffold582.g4610
OG0003845	CKAMA.g1193	CBRIG.CBG02115	CELEG.C43H6.4	CTROP.Csp11.Scaffold582.g4609
OG0003846	CKAMA.g1194	CBRIG.CBG02114	CELEG.C43H6.3	CTROP.Csp11.Scaffold582.g4608
OG0003847	CKAMA.g1195	CBRIG.CBG02113	CELEG.C43H6.1	CTROP.Csp11.Scaffold582.g4607
OG0003848	CKAMA.g1196	CBRIG.CBG02111	CELEG.C43H6.9	CTROP.Csp11.Scaffold582.g4605
OG0003849	CKAMA.g1197	CBRIG.CBG02110	CELEG.T07D1.1	CTROP.Csp11.Scaffold582.g4604
OG0003850	CKAMA.g1199	CBRIG.CBG02108	CELEG.T07D1.4	CTROP.Csp11.Scaffold582.g4601
OG0003851	CKAMA.g1200	CBRIG.CBG02105	CELEG.R04B3.1	CTROP.Csp11.Scaffold582.g4614
OG0003852	CKAMA.g1201	CBRIG.CBG02103	CELEG.R04B3.3	CTROP.Csp11.Scaffold582.g4616
OG0003853	CKAMA.g1202	CBRIG.CBG02099	CELEG.K02E10.4	CTROP.Csp11.Scaffold582.g4618
OG0003854	CKAMA.g1203	CBRIG.CBG02098	CELEG.K02E10.2	CTROP.Csp11.Scaffold582.g4619
OG0003855	CKAMA.g1204	CBRIG.CBG02097	CELEG.K02E10.1	CTROP.Csp11.Scaffold582.g4620
OG0003856	CKAMA.g1205	CBRIG.CBG02096	CELEG.K02E10.7	CTROP.Csp11.Scaffold582.g4622
OG0003857	CKAMA.g1207	CBRIG.CBG02095	CELEG.K02E10.8	CTROP.Csp11.Scaffold582.g4623
OG0003858	CKAMA.g1208	CBRIG.CBG02093	CELEG.R11B5.1	CTROP.Csp11.Scaffold582.g4625
OG0003859	CKAMA.g1209	CBRIG.CBG02091	CELEG.F52H2.4	CTROP.Csp11.Scaffold582.g4629
OG0003860	CKAMA.g1212	CBRIG.CBG02083	CELEG.F52H2.7	CTROP.Csp11.Scaffold582.g4636
OG0003861	CKAMA.g1213	CBRIG.CBG02082	CELEG.F52H2.1	CTROP.Csp11.Scaffold582.g4637
OG0003862	CKAMA.g1214	CBRIG.CBG02081	CELEG.H01M10.3	CTROP.Csp11.Scaffold582.g4638
OG0003863	CKAMA.g1215	CBRIG.CBG02080	CELEG.H01M10.1	CTROP.Csp11.Scaffold582.g4639
OG0003864	CKAMA.g1217	CBRIG.CBG02077	CELEG.T03G6.2	CTROP.Csp11.Scaffold582.g4640
OG0003865	CKAMA.g1218	CBRIG.CBG02074	CELEG.T03G6.3	CTROP.Csp11.Scaffold582.g4643
OG0003866	CKAMA.g1219	CBRIG.CBG02071	CELEG.F54G2.1	CTROP.Csp11.Scaffold582.g4644
OG0003867	CKAMA.g1221	CBRIG.CBG02068	CELEG.C09B7.1	CTROP.Csp11.Scaffold582.g4647
OG0003868	CKAMA.g1223	CBRIG.CBG02064	CELEG.T14G11.3	CTROP.Csp11.Scaffold582.g4650
OG0003869	CKAMA.g1224	CBRIG.CBG02063	CELEG.T14G11.1	CTROP.Csp11.Scaffold582.g4651
OG0003870	CKAMA.g1225	CBRIG.CBG02062	CELEG.T02C5.1	CTROP.Csp11.Scaffold582.g4653
OG0003871	CKAMA.g1226	CBRIG.CBG02061	CELEG.T02C5.3	CTROP.Csp11.Scaffold582.g4654
OG0003872	CKAMA.g1227	CBRIG.CBG02059	CELEG.T02C5.5	CTROP.Csp11.Scaffold582.g4655
OG0003873	CKAMA.g1229	CBRIG.CBG02045	CELEG.C14A11.2	CTROP.Csp11.Scaffold582.g4662
OG0003874	CKAMA.g1230	CBRIG.CBG02044	CELEG.C14A11.5	CTROP.Csp11.Scaffold582.g4663
OG0003875	CKAMA.g1232	CBRIG.CBG02041	CELEG.C14A11.6	CTROP.Csp11.Scaffold582.g4666
OG0003876	CKAMA.g1233	CBRIG.CBG02040	CELEG.C14A11.1	CTROP.Csp11.Scaffold582.g4667
OG0003877	CKAMA.g1234	CBRIG.CBG02039	CELEG.C14A11.7	CTROP.Csp11.Scaffold582.g4668
OG0003878	CKAMA.g1235	CBRIG.CBG02038	CELEG.Y71H10B.1	CTROP.Csp11.Scaffold582.g4669
OG0003879	CKAMA.g1236	CBRIG.CBG02036	CELEG.F58H12.1	CTROP.Csp11.Scaffold582.g4670
OG0003880	CKAMA.g1237	CBRIG.CBG16041	CELEG.F53B3.1	CTROP.Csp11.Scaffold630.g17957
OG0003881	CKAMA.g1238	CBRIG.CBG02033	CELEG.F53B3.2	CTROP.Csp11.Scaffold582.g4672
OG0003882	CKAMA.g1239	CBRIG.CBG02032	CELEG.F53B3.6	CTROP.Csp11.Scaffold582.g4673
OG0003883	CKAMA.g1240	CBRIG.CBG02031	CELEG.F53B3.3	CTROP.Csp11.Scaffold582.g4674
OG0003884	CKAMA.g1241	CBRIG.CBG02030	CELEG.F53B3.5	CTROP.Csp11.Scaffold582.g4675
OG0003885	CKAMA.g1242	CBRIG.CBG02029	CELEG.B0410.2	CTROP.Csp11.Scaffold582.g4676
OG0003886	CKAMA.g1243	CBRIG.CBG02027	CELEG.F52B10.3	CTROP.Csp11.Scaffold582.g4678
OG0003887	CKAMA.g1246	CBRIG.CBG02023	CELEG.F52B10.2	CTROP.Csp11.Scaffold582.g4681
OG0003888	CKAMA.g1247	CBRIG.CBG02021	CELEG.Y71H10A.2	CTROP.Csp11.Scaffold582.g4685
OG0003889	CKAMA.g1248	CBRIG.CBG02020	CELEG.Y71H10A.1	CTROP.Csp11.Scaffold582.g4686
OG0003890	CKAMA.g1249	CBRIG.CBG02019	CELEG.Y41G9A.10	CTROP.Csp11.Scaffold582.g4687
OG0003891	CKAMA.g1250	CBRIG.CBG02018	CELEG.Y41G9A.5	CTROP.Csp11.Scaffold582.g4688
OG0003892	CKAMA.g1251	CBRIG.CBG02016	CELEG.Y41G9A.4	CTROP.Csp11.Scaffold582.g4689
OG0003893	CKAMA.g1252	CBRIG.CBG02013	CELEG.Y41G9A.1	CTROP.Csp11.Scaffold582.g4693
OG0003894	CKAMA.g1254	CBRIG.CBG02173	CELEG.Y102A11A.8	CTROP.Csp11.Scaffold582.g4696
OG0003895	CKAMA.g1257	CBRIG.CBG02176	CELEG.Y102A11A.5	CTROP.Csp11.Scaffold582.g4697
OG0003896	CKAMA.g1259	CBRIG.CBG17269	CELEG.T04F8.7	CTROP.Csp11.Scaffold557.g3787
OG0003897	CKAMA.g1260	CBRIG.CBG17270	CELEG.T04F8.9	CTROP.Csp11.Scaffold557.g3788
OG0003898	CKAMA.g1261	CBRIG.CBG17272	CELEG.T04F8.6	CTROP.Csp11.Scaffold557.g3789
OG0003899	CKAMA.g1262	CBRIG.CBG17273	CELEG.T04F8.1	CTROP.Csp11.Scaffold557.g3791
OG0003900	CKAMA.g1263	CBRIG.CBG17274	CELEG.T04F8.3	CTROP.Csp11.Scaffold557.g3792
OG0003901	CKAMA.g1264	CBRIG.CBG17275	CELEG.T04F8.2	CTROP.Csp11.Scaffold557.g3793
OG0003902	CKAMA.g1265	CBRIG.CBG17277	CELEG.T04F8.4	CTROP.Csp11.Scaffold557.g3794
OG0003903	CKAMA.g1266	CBRIG.CBG17278	CELEG.T04F8.8	CTROP.Csp11.Scaffold557.g3795
OG0003904	CKAMA.g1269	CBRIG.CBG17283	CELEG.Y71H9A.1	CTROP.Csp11.Scaffold44.g255
OG0003905	CKAMA.g1270	CBRIG.CBG17285	CELEG.F52D10.4	CTROP.Csp11.Scaffold44.g253
OG0003906	CKAMA.g1272	CBRIG.CBG17293	CELEG.F52D10.2	CTROP.Csp11.Scaffold629.g10037
OG0003907	CKAMA.g1273	CBRIG.CBG17294	CELEG.F52D10.1	CTROP.Csp11.Scaffold44.g247
OG0003908	CKAMA.g1276	CBRIG.CBG17298	CELEG.C35C5.5	CTROP.Csp11.Scaffold553.g3667
OG0003909	CKAMA.g1280	CBRIG.CBG17306	CELEG.C35C5.8	CTROP.Csp11.Scaffold553.g3672
OG0003910	CKAMA.g1281	CBRIG.CBG17312	CELEG.F29G6.3	CTROP.Csp11.Scaffold553.g3674
OG0003911	CKAMA.g1282	CBRIG.CBG17313	CELEG.F29G6.2	CTROP.Csp11.Scaffold553.g3675
OG0003912	CKAMA.g1283	CBRIG.CBG17314	CELEG.F29G6.1	CTROP.Csp11.Scaffold553.g3676
OG0003913	CKAMA.g1287	CBRIG.CBG17326	CELEG.T25C12.1	CTROP.Csp11.Scaffold49.g290
OG0003914	CKAMA.g1288	CBRIG.CBG17333	CELEG.F48C5.2	CTROP.Csp11.Scaffold49.g289
OG0003915	CKAMA.g1289	CBRIG.CBG17334	CELEG.F48C5.1	CTROP.Csp11.Scaffold49.g288
OG0003916	CKAMA.g1291	CBRIG.CBG17340	CELEG.F46C3.1	CTROP.Csp11.Scaffold49.g284
OG0003917	CKAMA.g1292	CBRIG.CBG17344	CELEG.F08B12.4	CTROP.Csp11.Scaffold49.g282
OG0003918	CKAMA.g1293	CBRIG.CBG17348	CELEG.F08B12.3	CTROP.Csp11.Scaffold49.g280
OG0003919	CKAMA.g1294	CBRIG.CBG17349	CELEG.F08B12.2	CTROP.Csp11.Scaffold49.g281
OG0003920	CKAMA.g1295	CBRIG.CBG17350	CELEG.F08B12.1	CTROP.Csp11.Scaffold49.g279
OG0003921	CKAMA.g1296	CBRIG.CBG17351	CELEG.F42E11.4	CTROP.Csp11.Scaffold31.g131
OG0003922	CKAMA.g1297	CBRIG.CBG17352	CELEG.F42E11.3	CTROP.Csp11.Scaffold31.g132
OG0003923	CKAMA.g1298	CBRIG.CBG17353	CELEG.F42E11.2	CTROP.Csp11.Scaffold31.g133
OG0003924	CKAMA.g1300	CBRIG.CBG17359	CELEG.ZK455.8	CTROP.Csp11.Scaffold31.g130
OG0003925	CKAMA.g1302	CBRIG.CBG17362	CELEG.ZK455.2	CTROP.Csp11.Scaffold31.g128
OG0003926	CKAMA.g1303	CBRIG.CBG17363	CELEG.ZK455.3	CTROP.Csp11.Scaffold31.g127
OG0003927	CKAMA.g1304	CBRIG.CBG17365	CELEG.ZK455.4	CTROP.Csp11.Scaffold450.g1288
OG0003928	CKAMA.g1305	CBRIG.CBG17366	CELEG.ZK455.6	CTROP.Csp11.Scaffold450.g1289
OG0003929	CKAMA.g1306	CBRIG.CBG17367	CELEG.F08G12.8	CTROP.Csp11.Scaffold450.g1290
OG0003930	CKAMA.g1307	CBRIG.CBG17368	CELEG.F08G12.11	CTROP.Csp11.Scaffold450.g1291
OG0003931	CKAMA.g1309	CBRIG.CBG17370	CELEG.F08G12.4	CTROP.Csp11.Scaffold450.g1293
OG0003932	CKAMA.g1311	CBRIG.CBG17372	CELEG.F08G12.1	CTROP.Csp11.Scaffold450.g1295
OG0003934	CKAMA.g1317	CBRIG.CBG17385	CELEG.C03A3.3	CTROP.Csp11.Scaffold450.g1287
OG0003935	CKAMA.g1318	CBRIG.CBG17386	CELEG.C03A3.2	CTROP.Csp11.Scaffold450.g1286
OG0003936	CKAMA.g1319	CBRIG.CBG17387	CELEG.C03A3.1	CTROP.Csp11.Scaffold450.g1285
OG0003937	CKAMA.g1320	CBRIG.CBG17392	CELEG.C34F6.10	CTROP.Csp11.Scaffold515.g2683
OG0003938	CKAMA.g1321	CBRIG.CBG17395	CELEG.C34F6.9	CTROP.Csp11.Scaffold515.g2680
OG0003939	CKAMA.g1322	CBRIG.CBG17397	CELEG.C34F6.8	CTROP.Csp11.Scaffold515.g2679
OG0003940	CKAMA.g1323	CBRIG.CBG17398	CELEG.C34F6.7	CTROP.Csp11.Scaffold515.g2678
OG0003941	CKAMA.g1324	CBRIG.CBG17399	CELEG.C34F6.5	CTROP.Csp11.Scaffold515.g2677
OG0003942	CKAMA.g1325	CBRIG.CBG17400	CELEG.C34F6.4	CTROP.Csp11.Scaffold515.g2676
OG0003943	CKAMA.g1329	CBRIG.CBG17404	CELEG.C34F6.1	CTROP.Csp11.Scaffold515.g2673
OG0003944	CKAMA.g1330	CBRIG.CBG17406	CELEG.F13D2.3	CTROP.Csp11.Scaffold515.g2670
OG0003945	CKAMA.g1331	CBRIG.CBG17407	CELEG.F13D2.2	CTROP.Csp11.Scaffold515.g2669
OG0003946	CKAMA.g1332	CBRIG.CBG17405	CELEG.F13D2.1	CTROP.Csp11.Scaffold515.g2667
OG0003947	CKAMA.g1333	CBRIG.CBG17409	CELEG.C05C9.1	CTROP.Csp11.Scaffold515.g2666
OG0003948	CKAMA.g1334	CBRIG.CBG17415	CELEG.C05C9.2	CTROP.Csp11.Scaffold515.g2663
OG0003949	CKAMA.g1335	CBRIG.CBG17430	CELEG.R08B4.2	CTROP.Csp11.Scaffold515.g2660
OG0003950	CKAMA.g1336	CBRIG.CBG17432	CELEG.R08B4.5	CTROP.Csp11.Scaffold515.g2658
OG0003951	CKAMA.g1339	CBRIG.CBG17438	CELEG.W02H3.3	CTROP.Csp11.Scaffold515.g2653
OG0003952	CKAMA.g1343	CBRIG.CBG27545	CELEG.W04G3.11	CTROP.Csp11.Scaffold515.g2649
OG0003953	CKAMA.g1347	CBRIG.CBG17506	CELEG.W04G3.3	CTROP.Csp11.Scaffold515.g2643
OG0003954	CKAMA.g1348	CBRIG.CBG17507	CELEG.W04G3.2	CTROP.Csp11.Scaffold515.g2642
OG0003955	CKAMA.g1349	CBRIG.CBG17508	CELEG.W04G3.1	CTROP.Csp11.Scaffold515.g2641
OG0003956	CKAMA.g1350	CBRIG.CBG17509	CELEG.W04G3.8	CTROP.Csp11.Scaffold515.g2640
OG0003957	CKAMA.g1351	CBRIG.CBG17510	CELEG.C09F12.2	CTROP.Csp11.Scaffold515.g2639
OG0003958	CKAMA.g1352	CBRIG.CBG17511	CELEG.C09F12.1	CTROP.Csp11.Scaffold515.g2638
OG0003959	CKAMA.g1353	CBRIG.CBG17512	CELEG.C09F12.3	CTROP.Csp11.Scaffold630.g21943
OG0003960	CKAMA.g1355	CBRIG.CBG17516	CELEG.F58A3.2	CTROP.Csp11.Scaffold630.g21942
OG0003961	CKAMA.g1356	CBRIG.CBG17519	CELEG.F58A3.5	CTROP.Csp11.Scaffold630.g21940
OG0003962	CKAMA.g1357	CBRIG.CBG17520	CELEG.F59F3.4	CTROP.Csp11.Scaffold630.g21939
OG0003963	CKAMA.g1358	CBRIG.CBG17531	CELEG.F59F3.2	CTROP.Csp11.Scaffold630.g21938
OG0003964	CKAMA.g1359	CBRIG.CBG17532	CELEG.F59F3.6	CTROP.Csp11.Scaffold630.g21937
OG0003965	CKAMA.g1361	CBRIG.CBG17537	CELEG.K09C8.5	CTROP.Csp11.Scaffold629.g13848
OG0003966	CKAMA.g1362	CBRIG.CBG17538	CELEG.K09C8.8	CTROP.Csp11.Scaffold629.g13847
OG0003967	CKAMA.g1363	CBRIG.CBG17539	CELEG.K09C8.4	CTROP.Csp11.Scaffold629.g13846
OG0003968	CKAMA.g1366	CBRIG.CBG17542	CELEG.K09C8.3	CTROP.Csp11.Scaffold629.g13843
OG0003969	CKAMA.g1367	CBRIG.CBG17543	CELEG.K09C8.2	CTROP.Csp11.Scaffold629.g13842
OG0003970	CKAMA.g1368	CBRIG.CBG17545	CELEG.K09C8.1	CTROP.Csp11.Scaffold629.g13840
OG0003971	CKAMA.g1369	CBRIG.CBG17547	CELEG.T21B6.3	CTROP.Csp11.Scaffold629.g13838
OG0003972	CKAMA.g1370	CBRIG.CBG17548	CELEG.T21B6.2	CTROP.Csp11.Scaffold629.g13837
OG0003973	CKAMA.g1373	CBRIG.CBG17557	CELEG.F47B10.8	CTROP.Csp11.Scaffold629.g13830
OG0003974	CKAMA.g1374	CBRIG.CBG17558	CELEG.F47B10.7	CTROP.Csp11.Scaffold629.g13829
OG0003975	CKAMA.g1375	CBRIG.CBG17559	CELEG.F47B10.1	CTROP.Csp11.Scaffold629.g13828
OG0003976	CKAMA.g1377	CBRIG.CBG17561	CELEG.F47B10.3	CTROP.Csp11.Scaffold629.g13826
OG0003977	CKAMA.g1379	CBRIG.CBG17563	CELEG.F47B10.5	CTROP.Csp11.Scaffold629.g13824
OG0003978	CKAMA.g1380	CBRIG.CBG17564	CELEG.F47B10.6	CTROP.Csp11.Scaffold629.g13823
OG0003979	CKAMA.g1381	CBRIG.CBG17567	CELEG.T21E8.6	CTROP.Csp11.Scaffold629.g13820
OG0003980	CKAMA.g1385	CBRIG.CBG17577	CELEG.C05A9.2	CTROP.Csp11.Scaffold629.g13814
OG0003981	CKAMA.g1389	CBRIG.CBG17592	CELEG.T05A10.5	CTROP.Csp11.Scaffold629.g13807
OG0003982	CKAMA.g1390	CBRIG.CBG17593	CELEG.T05A10.3	CTROP.Csp11.Scaffold629.g13806
OG0003983	CKAMA.g1392	CBRIG.CBG17595	CELEG.T05A10.1	CTROP.Csp11.Scaffold629.g13804
OG0003984	CKAMA.g1394	CBRIG.CBG17597	CELEG.R07A4.4	CTROP.Csp11.Scaffold629.g13800
OG0003985	CKAMA.g1395	CBRIG.CBG17604	CELEG.R07A4.2	CTROP.Csp11.Scaffold629.g13795
OG0003986	CKAMA.g1399	CBRIG.CBG04528	CELEG.T01C1.2	CTROP.Csp11.Scaffold629.g13789
OG0003987	CKAMA.g1401	CBRIG.CBG04522	CELEG.F13E6.6	CTROP.Csp11.Scaffold629.g13791
OG0003988	CKAMA.g1402	CBRIG.CBG04521	CELEG.F13E6.5	CTROP.Csp11.Scaffold629.g13792
OG0003989	CKAMA.g1404	CBRIG.CBG04517	CELEG.F13E6.1	CTROP.Csp11.Scaffold629.g13788
OG0003990	CKAMA.g1405	CBRIG.CBG04516	CELEG.F13E6.2	CTROP.Csp11.Scaffold629.g13787
OG0003991	CKAMA.g1406	CBRIG.CBG04512	CELEG.F11A1.3	CTROP.Csp11.Scaffold629.g13785
OG0003992	CKAMA.g1407	CBRIG.CBG04511	CELEG.M79.2	CTROP.Csp11.Scaffold629.g13784
OG0003993	CKAMA.g1408	CBRIG.CBG04507	CELEG.M79.1	CTROP.Csp11.Scaffold629.g13783
OG0003994	CKAMA.g1409	CBRIG.CBG04506	CELEG.M79.4	CTROP.Csp11.Scaffold629.g13782
OG0003995	CKAMA.g1410	CBRIG.CBG04505	CELEG.F57C7.3	CTROP.Csp11.Scaffold629.g13781
OG0003996	CKAMA.g1411	CBRIG.CBG04502	CELEG.F57C7.4	CTROP.Csp11.Scaffold629.g13780
OG0003997	CKAMA.g1412	CBRIG.CBG04501	CELEG.F57C7.2	CTROP.Csp11.Scaffold629.g13779
OG0003998	CKAMA.g1414	CBRIG.CBG04493	CELEG.F59F5.6	CTROP.Csp11.Scaffold629.g13769
OG0003999	CKAMA.g1415	CBRIG.CBG04492	CELEG.F59F5.5	CTROP.Csp11.Scaffold629.g13768
OG0004000	CKAMA.g8136	CBRIG.CBG14953	CELEG.K03E5.2	CTROP.Csp11.Scaffold627.g6814
OG0004001	CKAMA.g15957	CBRIG.CBG02410	CELEG.F12A10.5	CTROP.Csp11.Scaffold629.g11395
OG0004002	CKAMA.g8146	CBRIG.CBG14884	CELEG.Y119C1B.6	CTROP.Csp11.Scaffold617.g6047
OG0004003	CKAMA.g8147	CBRIG.CBG14880	CELEG.Y119C1B.9	CTROP.Csp11.Scaffold617.g6042
OG0004004	CKAMA.g8152	CBRIG.CBG14891	CELEG.M01E11.4	CTROP.Csp11.Scaffold617.g6029
OG0004005	CKAMA.g8153	CBRIG.CBG22279	CELEG.D1007.1	CTROP.Csp11.Scaffold534.g3220
OG0004006	CKAMA.g8154	CBRIG.CBG22284	CELEG.F47G6.2	CTROP.Csp11.Scaffold451.g1333
OG0004007	CKAMA.g8155	CBRIG.CBG22285	CELEG.F47G6.1	CTROP.Csp11.Scaffold451.g1334
OG0004008	CKAMA.g8156	CBRIG.CBG22281	CELEG.Y92H12A.5	CTROP.Csp11.Scaffold534.g3241
OG0004009	CKAMA.g8157	CBRIG.CBG22280	CELEG.Y92H12A.4	CTROP.Csp11.Scaffold534.g3240
OG0004010	CKAMA.g8158	CBRIG.CBG22256	CELEG.Y92H12A.2	CTROP.Csp11.Scaffold534.g3239
OG0004011	CKAMA.g8159	CBRIG.CBG22259	CELEG.Y92H12A.1	CTROP.Csp11.Scaffold534.g3238
OG0004012	CKAMA.g8161	CBRIG.CBG22265	CELEG.Y73E7A.3	CTROP.Csp11.Scaffold534.g3237
OG0004013	CKAMA.g8162	CBRIG.CBG22267	CELEG.C44E4.5	CTROP.Csp11.Scaffold534.g3234
OG0004014	CKAMA.g8163	CBRIG.CBG22270	CELEG.D1007.7	CTROP.Csp11.Scaffold534.g3231
OG0004015	CKAMA.g8164	CBRIG.CBG22271	CELEG.D1007.19	CTROP.Csp11.Scaffold534.g3229
OG0004016	CKAMA.g8165	CBRIG.CBG22272	CELEG.D1007.10	CTROP.Csp11.Scaffold534.g3228
OG0004017	CKAMA.g8166	CBRIG.CBG22273	CELEG.D1007.12	CTROP.Csp11.Scaffold534.g3227
OG0004018	CKAMA.g8167	CBRIG.CBG22275	CELEG.D1007.5	CTROP.Csp11.Scaffold534.g3225
OG0004019	CKAMA.g8168	CBRIG.CBG22276	CELEG.D1007.4	CTROP.Csp11.Scaffold534.g3223
OG0004020	CKAMA.g8170	CBRIG.CBG31235	CELEG.D1007.3	CTROP.Csp11.Scaffold534.g3222
OG0004021	CKAMA.g8173	CBRIG.CBG15094	CELEG.Y92H12BR.8	CTROP.Csp11.Scaffold629.g8536
OG0004022	CKAMA.g8175	CBRIG.CBG15096	CELEG.Y92H12BR.2	CTROP.Csp11.Scaffold629.g8544
OG0004023	CKAMA.g8176	CBRIG.CBG15097	CELEG.Y92H12BR.6	CTROP.Csp11.Scaffold629.g8543
OG0004024	CKAMA.g8179	CBRIG.CBG15102	CELEG.Y92H12BL.5	CTROP.Csp11.Scaffold629.g8540
OG0004025	CKAMA.g8182	CBRIG.CBG22296	CELEG.W09C3.4	CTROP.Csp11.Scaffold629.g8528
OG0004026	CKAMA.g8183	CBRIG.CBG22297	CELEG.T04D1.4	CTROP.Csp11.Scaffold629.g8510
OG0004027	CKAMA.g8185	CBRIG.CBG22292	CELEG.T04D1.3	CTROP.Csp11.Scaffold629.g8509
OG0004028	CKAMA.g8186	CBRIG.CBG22293	CELEG.B0041.7	CTROP.Csp11.Scaffold629.g8508
OG0004029	CKAMA.g8189	CBRIG.CBG22239	CELEG.C44E4.6	CTROP.Csp11.Scaffold629.g8551
OG0004030	CKAMA.g8191	CBRIG.CBG22236	CELEG.B0041.3	CTROP.Csp11.Scaffold629.g8554
OG0004031	CKAMA.g8192	CBRIG.CBG22235	CELEG.B0041.4	CTROP.Csp11.Scaffold629.g8555
OG0004032	CKAMA.g8193	CBRIG.CBG22234	CELEG.B0041.8	CTROP.Csp11.Scaffold629.g8556
OG0004033	CKAMA.g8194	CBRIG.CBG22233	CELEG.B0041.5	CTROP.Csp11.Scaffold629.g8557
OG0004034	CKAMA.g8195	CBRIG.CBG22232	CELEG.B0041.6	CTROP.Csp11.Scaffold629.g8558
OG0004035	CKAMA.g8196	CBRIG.CBG22231	CELEG.B0041.2	CTROP.Csp11.Scaffold629.g8559
OG0004036	CKAMA.g8197	CBRIG.CBG22171	CELEG.Y71G12B.24	CTROP.Csp11.Scaffold451.g1311
OG0004037	CKAMA.g8199	CBRIG.CBG22169	CELEG.Y71G12B.9	CTROP.Csp11.Scaffold451.g1313
OG0004038	CKAMA.g8201	CBRIG.CBG22168	CELEG.Y71G12B.25	CTROP.Csp11.Scaffold451.g1315
OG0004039	CKAMA.g8203	CBRIG.CBG22163	CELEG.Y73E7A.8	CTROP.Csp11.Scaffold451.g1327
OG0004040	CKAMA.g8204	CBRIG.CBG22164	CELEG.Y73E7A.1	CTROP.Csp11.Scaffold451.g1326
OG0004041	CKAMA.g8205	CBRIG.CBG22165	CELEG.Y73E7A.7	CTROP.Csp11.Scaffold451.g1325
OG0004042	CKAMA.g8207	CBRIG.CBG22159	CELEG.Y73E7A.6	CTROP.Csp11.Scaffold451.g1323
OG0004043	CKAMA.g8208	CBRIG.CBG22158	CELEG.Y73E7A.2	CTROP.Csp11.Scaffold451.g1322
OG0004044	CKAMA.g8209	CBRIG.CBG22157	CELEG.Y73E7A.4	CTROP.Csp11.Scaffold451.g1318
OG0004045	CKAMA.g8210	CBRIG.CBG22228	CELEG.Y71G12B.6	CTROP.Csp11.Scaffold451.g1309
OG0004046	CKAMA.g8211	CBRIG.CBG22229	CELEG.Y71G12B.18	CTROP.Csp11.Scaffold451.g1308
OG0004047	CKAMA.g8215	CBRIG.CBG22145	CELEG.Y71G12B.17	CTROP.Csp11.Scaffold629.g8456
OG0004048	CKAMA.g8217	CBRIG.CBG22146	CELEG.Y71G12B.35	CTROP.Csp11.Scaffold629.g8455
OG0004049	CKAMA.g8218	CBRIG.CBG22147	CELEG.Y71G12B.16	CTROP.Csp11.Scaffold629.g8457
OG0004050	CKAMA.g8220	CBRIG.CBG22149	CELEG.Y71G12B.15	CTROP.Csp11.Scaffold630.g19605
OG0004051	CKAMA.g8221	CBRIG.CBG22153	CELEG.Y71G12B.11	CTROP.Csp11.Scaffold629.g8506
OG0004052	CKAMA.g8222	CBRIG.CBG22155	CELEG.Y71G12B.21	CTROP.Csp11.Scaffold629.g8507
OG0004053	CKAMA.g8227	CBRIG.CBG22199	CELEG.Y71G12B.4	CTROP.Csp11.Scaffold629.g8443
OG0004054	CKAMA.g8230	CBRIG.CBG22204	CELEG.Y71G12B.1	CTROP.Csp11.Scaffold629.g8436
OG0004055	CKAMA.g8231	CBRIG.CBG22211	CELEG.M01D7.7	CTROP.Csp11.Scaffold629.g8433
OG0004056	CKAMA.g8233	CBRIG.CBG22219	CELEG.M01D7.2	CTROP.Csp11.Scaffold629.g8429
OG0004057	CKAMA.g8234	CBRIG.CBG22218	CELEG.Y71G12A.3	CTROP.Csp11.Scaffold629.g8428
OG0004058	CKAMA.g8235	CBRIG.CBG22222	CELEG.Y71G12A.4	CTROP.Csp11.Scaffold629.g8427
OG0004059	CKAMA.g8236	CBRIG.CBG22130	CELEG.Y71G12A.2	CTROP.Csp11.Scaffold629.g8426
OG0004060	CKAMA.g8238	CBRIG.CBG22126	CELEG.Y51F10.4	CTROP.Csp11.Scaffold629.g8420
OG0004061	CKAMA.g8239	CBRIG.CBG22132	CELEG.Y51F10.3	CTROP.Csp11.Scaffold629.g15455
OG0004062	CKAMA.g8240	CBRIG.CBG22133	CELEG.Y51F10.11	CTROP.Csp11.Scaffold629.g15456
OG0004063	CKAMA.g8241	CBRIG.CBG22135	CELEG.Y51F10.10	CTROP.Csp11.Scaffold629.g15457
OG0004064	CKAMA.g8242	CBRIG.CBG22137	CELEG.Y71G12B.20	CTROP.Csp11.Scaffold629.g15454
OG0004065	CKAMA.g8246	CBRIG.CBG22047	CELEG.Y37E3.3	CTROP.Csp11.Scaffold629.g9808
OG0004066	CKAMA.g8247	CBRIG.CBG22048	CELEG.Y37E3.1	CTROP.Csp11.Scaffold629.g9809
OG0004067	CKAMA.g8248	CBRIG.CBG22050	CELEG.Y20F4.2	CTROP.Csp11.Scaffold629.g9811
OG0004068	CKAMA.g8249	CBRIG.CBG22075	CELEG.Y20F4.3	CTROP.Csp11.Scaffold629.g9813
OG0004069	CKAMA.g8250	CBRIG.CBG22045	CELEG.Y37E3.5	CTROP.Csp11.Scaffold629.g9805
OG0004070	CKAMA.g8251	CBRIG.CBG22044	CELEG.Y37E3.7	CTROP.Csp11.Scaffold629.g9804
OG0004071	CKAMA.g8252	CBRIG.CBG22043	CELEG.Y37E3.8	CTROP.Csp11.Scaffold629.g9803
OG0004072	CKAMA.g8253	CBRIG.CBG22042	CELEG.Y37E3.9	CTROP.Csp11.Scaffold629.g9802
OG0004073	CKAMA.g8254	CBRIG.CBG22040	CELEG.Y37E3.11	CTROP.Csp11.Scaffold629.g9800
OG0004074	CKAMA.g8255	CBRIG.CBG22037	CELEG.Y37E3.13	CTROP.Csp11.Scaffold629.g9799
OG0004075	CKAMA.g8256	CBRIG.CBG22089	CELEG.Y37E3.15	CTROP.Csp11.Scaffold630.g17317
OG0004076	CKAMA.g8258	CBRIG.CBG22093	CELEG.Y37E3.17	CTROP.Csp11.Scaffold630.g17318
OG0004077	CKAMA.g8260	CBRIG.CBG22096	CELEG.C06A5.1	CTROP.Csp11.Scaffold630.g17320
OG0004078	CKAMA.g8261	CBRIG.CBG22101	CELEG.B0025.1	CTROP.Csp11.Scaffold630.g17323
OG0004079	CKAMA.g8263	CBRIG.CBG22028	CELEG.C54G6.5	CTROP.Csp11.Scaffold508.g2490
OG0004080	CKAMA.g8265	CBRIG.CBG22031	CELEG.Y34D9A.1	CTROP.Csp11.Scaffold508.g2492
OG0004081	CKAMA.g8267	CBRIG.CBG22036	CELEG.Y34D9A.6	CTROP.Csp11.Scaffold629.g8183
OG0004082	CKAMA.g8268	CBRIG.CBG22083	CELEG.Y34D9A.10	CTROP.Csp11.Scaffold508.g2485
OG0004083	CKAMA.g8271	CBRIG.CBG22078	CELEG.R06A10.2	CTROP.Csp11.Scaffold630.g17373
OG0004084	CKAMA.g8272	CBRIG.CBG22086	CELEG.R06A10.1	CTROP.Csp11.Scaffold630.g17372
OG0004085	CKAMA.g8273	CBRIG.CBG22088	CELEG.R06A10.4	CTROP.Csp11.Scaffold630.g17371
OG0004086	CKAMA.g8274	CBRIG.CBG22104	CELEG.C54G6.1	CTROP.Csp11.Scaffold630.g17331
OG0004087	CKAMA.g8275	CBRIG.CBG22107	CELEG.F54A5.1	CTROP.Csp11.Scaffold630.g17330
OG0004088	CKAMA.g8276	CBRIG.CBG22108	CELEG.C54G6.3	CTROP.Csp11.Scaffold630.g17327
OG0004089	CKAMA.g8277	CBRIG.CBG13253	CELEG.T25E12.5	CTROP.Csp11.Scaffold599.g5363
OG0004090	CKAMA.g8279	CBRIG.CBG22074	CELEG.C53D5.1	CTROP.Csp11.Scaffold629.g15191
OG0004091	CKAMA.g8280	CBRIG.CBG22062	CELEG.C53D5.6	CTROP.Csp11.Scaffold629.g15189
OG0004092	CKAMA.g8282	CBRIG.CBG22064	CELEG.Y48G1A.4	CTROP.Csp11.Scaffold629.g15187
OG0004093	CKAMA.g8283	CBRIG.CBG31239	CELEG.Y48G1A.3	CTROP.Csp11.Scaffold629.g15186
OG0004094	CKAMA.g8284	CBRIG.CBG22069	CELEG.W04C9.5	CTROP.Csp11.Scaffold537.g3328
OG0004095	CKAMA.g8285	CBRIG.CBG22060	CELEG.W04C9.4	CTROP.Csp11.Scaffold537.g3327
OG0004096	CKAMA.g8286	CBRIG.CBG22058	CELEG.C07F11.1	CTROP.Csp11.Scaffold537.g3323
OG0004097	CKAMA.g8288	CBRIG.CBG22054	CELEG.C07F11.2	CTROP.Csp11.Scaffold537.g3325
OG0004098	CKAMA.g8289	CBRIG.CBG22052	CELEG.Y50C1A.2	CTROP.Csp11.Scaffold537.g3326
OG0004099	CKAMA.g8290	CBRIG.CBG22120	CELEG.Y50C1A.1	CTROP.Csp11.Scaffold537.g3322
OG0004100	CKAMA.g8292	CBRIG.CBG22118	CELEG.R119.5	CTROP.Csp11.Scaffold537.g3320
OG0004101	CKAMA.g8296	CBRIG.CBG29966	CELEG.R119.2	CTROP.Csp11.Scaffold508.g2489
OG0004102	CKAMA.g8297	CBRIG.CBG05099	CELEG.F53G12.6	CTROP.Csp11.Scaffold616.g6019
OG0004103	CKAMA.g8298	CBRIG.CBG05100	CELEG.F53G12.5	CTROP.Csp11.Scaffold629.g12805
OG0004104	CKAMA.g8299	CBRIG.CBG05101	CELEG.F53G12.4	CTROP.Csp11.Scaffold629.g14581
OG0004105	CKAMA.g8302	CBRIG.CBG22009	CELEG.F56C11.5	CTROP.Csp11.Scaffold629.g9916
OG0004106	CKAMA.g8303	CBRIG.CBG22010	CELEG.F56C11.3	CTROP.Csp11.Scaffold629.g9925
OG0004107	CKAMA.g8304	CBRIG.CBG22015	CELEG.Y48G1BL.2	CTROP.Csp11.Scaffold629.g9924
OG0004109	CKAMA.g8310	CBRIG.CBG05096	CELEG.Y48G1A.1	CTROP.Csp11.Scaffold616.g6017
OG0004110	CKAMA.g8311	CBRIG.CBG05095	CELEG.Y48G1A.2	CTROP.Csp11.Scaffold616.g6016
OG0004111	CKAMA.g8313	CBRIG.CBG05090	CELEG.W04C9.3	CTROP.Csp11.Scaffold629.g9934
OG0004112	CKAMA.g8315	CBRIG.CBG22668	CELEG.W04C9.1	CTROP.Csp11.Scaffold629.g9931
OG0004113	CKAMA.g8316	CBRIG.CBG22667	CELEG.Y65B4BL.3	CTROP.Csp11.Scaffold629.g9930
OG0004114	CKAMA.g8317	CBRIG.CBG22666	CELEG.Y65B4BL.4	CTROP.Csp11.Scaffold629.g9929
OG0004115	CKAMA.g8318	CBRIG.CBG22004	CELEG.Y65B4BL.2	CTROP.Csp11.Scaffold629.g9928
OG0004116	CKAMA.g8320	CBRIG.CBG05109	CELEG.Y65B4BL.5	CTROP.Csp11.Scaffold629.g9926
OG0004117	CKAMA.g8324	CBRIG.CBG05115	CELEG.Y65B4BR.4	CTROP.Csp11.Scaffold629.g8619
OG0004118	CKAMA.g8325	CBRIG.CBG05116	CELEG.Y65B4BR.3	CTROP.Csp11.Scaffold629.g8612
OG0004119	CKAMA.g8326	CBRIG.CBG18554	CELEG.T06A4.1	CTROP.Csp11.Scaffold629.g8630
OG0004120	CKAMA.g8329	CBRIG.CBG05158	CELEG.Y18H1A.9	CTROP.Csp11.Scaffold630.g18593
OG0004121	CKAMA.g8338	CBRIG.CBG21974	CELEG.F31D5.5	CTROP.Csp11.Scaffold629.g13196
OG0004122	CKAMA.g8341	CBRIG.CBG13480	CELEG.T05C1.2	CTROP.Csp11.Scaffold630.g17454
OG0004123	CKAMA.g8342	CBRIG.CBG13481	CELEG.T05C1.1	CTROP.Csp11.Scaffold630.g17451
OG0004124	CKAMA.g8345	CBRIG.CBG13485	CELEG.W06B4.3	CTROP.Csp11.Scaffold630.g21304
OG0004125	CKAMA.g8348	CBRIG.CBG03684	CELEG.ZK430.1	CTROP.Csp11.Scaffold630.g21296
OG0004126	CKAMA.g8349	CBRIG.CBG03683	CELEG.ZK430.7	CTROP.Csp11.Scaffold630.g21295
OG0004127	CKAMA.g8350	CBRIG.CBG03681	CELEG.ZK430.2	CTROP.Csp11.Scaffold630.g21292
OG0004128	CKAMA.g8351	CBRIG.CBG03673	CELEG.B0286.2	CTROP.Csp11.Scaffold630.g21298
OG0004129	CKAMA.g8352	CBRIG.CBG03674	CELEG.B0286.6	CTROP.Csp11.Scaffold441.g1191
OG0004130	CKAMA.g8353	CBRIG.CBG03675	CELEG.B0286.3	CTROP.Csp11.Scaffold630.g21293
OG0004131	CKAMA.g8354	CBRIG.CBG03676	CELEG.B0286.4	CTROP.Csp11.Scaffold630.g21294
OG0004132	CKAMA.g8355	CBRIG.CBG03677	CELEG.B0286.1	CTROP.Csp11.Scaffold630.g21290
OG0004133	CKAMA.g8358	CBRIG.CBG03665	CELEG.H20J04.9	CTROP.Csp11.Scaffold629.g13187
OG0004134	CKAMA.g8359	CBRIG.CBG03666	CELEG.H20J04.2	CTROP.Csp11.Scaffold629.g13192
OG0004135	CKAMA.g8360	CBRIG.CBG30120	CELEG.H20J04.3	CTROP.Csp11.Scaffold629.g13193
OG0004137	CKAMA.g8362	CBRIG.CBG03669	CELEG.H20J04.8	CTROP.Csp11.Scaffold629.g13195
OG0004138	CKAMA.g8363	CBRIG.CBG03670	CELEG.H20J04.6	CTROP.Csp11.Scaffold629.g13201
OG0004139	CKAMA.g8366	CBRIG.CBG03656	CELEG.C01F1.3	CTROP.Csp11.Scaffold629.g13204
OG0004140	CKAMA.g8367	CBRIG.CBG03659	CELEG.C01F1.6	CTROP.Csp11.Scaffold629.g13205
OG0004141	CKAMA.g8370	CBRIG.CBG21945	CELEG.C16A11.8	CTROP.Csp11.Scaffold629.g15580
OG0004142	CKAMA.g8373	CBRIG.CBG13458	CELEG.K07E1.1	CTROP.Csp11.Scaffold629.g15084
OG0004144	CKAMA.g8377	CBRIG.CBG13414	CELEG.T05A7.7	CTROP.Csp11.Scaffold629.g8276
OG0004145	CKAMA.g8381	CBRIG.CBG04295	CELEG.F10G7.4	CTROP.Csp11.Scaffold492.g2114
OG0004146	CKAMA.g8382	CBRIG.CBG04293	CELEG.F10G7.9	CTROP.Csp11.Scaffold492.g2112
OG0004147	CKAMA.g8383	CBRIG.CBG04292	CELEG.F10G7.2	CTROP.Csp11.Scaffold492.g2111
OG0004148	CKAMA.g8384	CBRIG.CBG04291	CELEG.F10G7.1	CTROP.Csp11.Scaffold492.g2110
OG0004149	CKAMA.g8386	CBRIG.CBG04286	CELEG.F41C3.8	CTROP.Csp11.Scaffold492.g2124
OG0004150	CKAMA.g1422	CBRIG.CBG21849	CELEG.R13D11.10	CTROP.Csp11.Scaffold518.g2764
OG0004151	CKAMA.g16022	CBRIG.CBG19828	CELEG.H04M03.4	CTROP.Csp11.Scaffold499.g2251
OG0004152	CKAMA.g8391	CBRIG.CBG05657	CELEG.C06H5.6	CTROP.Csp11.Scaffold630.g21869
OG0004153	CKAMA.g8392	CBRIG.CBG07390	CELEG.C04A11.2	CTROP.Csp11.Scaffold630.g22047
OG0004154	CKAMA.g8393	CBRIG.CBG07388	CELEG.C04A11.4	CTROP.Csp11.Scaffold630.g22045
OG0004155	CKAMA.g8395	CBRIG.CBG07384	CELEG.K02D3.2	CTROP.Csp11.Scaffold630.g22044
OG0004156	CKAMA.g8396	CBRIG.CBG07383	CELEG.K11E4.1	CTROP.Csp11.Scaffold630.g22043
OG0004158	CKAMA.g8401	CBRIG.CBG07380	CELEG.K11E4.4	CTROP.Csp11.Scaffold630.g22041
OG0004159	CKAMA.g8402	CBRIG.CBG07379	CELEG.K11E4.5	CTROP.Csp11.Scaffold630.g22040
OG0004160	CKAMA.g8405	CBRIG.CBG07370	CELEG.ZK1086.1	CTROP.Csp11.Scaffold630.g22034
OG0004161	CKAMA.g8406	CBRIG.CBG07369	CELEG.F19D8.1	CTROP.Csp11.Scaffold630.g22033
OG0004162	CKAMA.g8407	CBRIG.CBG07367	CELEG.F19D8.2	CTROP.Csp11.Scaffold630.g22032
OG0004163	CKAMA.g8408	CBRIG.CBG07361	CELEG.M03B6.2	CTROP.Csp11.Scaffold630.g22030
OG0004164	CKAMA.g8409	CBRIG.CBG07358	CELEG.T21H8.1	CTROP.Csp11.Scaffold630.g22027
OG0004165	CKAMA.g8414	CBRIG.CBG07638	CELEG.H40L08.3	CTROP.Csp11.Scaffold466.g1598
OG0004166	CKAMA.g8416	CBRIG.CBG07636	CELEG.H40L08.1	CTROP.Csp11.Scaffold466.g1599
OG0004167	CKAMA.g8417	CBRIG.CBG07634	CELEG.F09B12.6	CTROP.Csp11.Scaffold466.g1601
OG0004168	CKAMA.g8418	CBRIG.CBG07632	CELEG.F09B12.3	CTROP.Csp11.Scaffold466.g1602
OG0004169	CKAMA.g8420	CBRIG.CBG07630	CELEG.F09B12.1	CTROP.Csp11.Scaffold466.g1604
OG0004170	CKAMA.g8421	CBRIG.CBG07621	CELEG.C11G10.1	CTROP.Csp11.Scaffold558.g3797
OG0004171	CKAMA.g8422	CBRIG.CBG07620	CELEG.T10B10.8	CTROP.Csp11.Scaffold558.g3798
OG0004172	CKAMA.g8423	CBRIG.CBG07619	CELEG.T10B10.7	CTROP.Csp11.Scaffold558.g3799
OG0004173	CKAMA.g8425	CBRIG.CBG07617	CELEG.T10B10.2	CTROP.Csp11.Scaffold558.g3801
OG0004174	CKAMA.g8426	CBRIG.CBG07612	CELEG.T10B10.3	CTROP.Csp11.Scaffold558.g3802
OG0004175	CKAMA.g8427	CBRIG.CBG07665	CELEG.T10B10.4	CTROP.Csp11.Scaffold558.g3803
OG0004176	CKAMA.g8428	CBRIG.CBG07666	CELEG.T10B10.6	CTROP.Csp11.Scaffold558.g3804
OG0004177	CKAMA.g8429	CBRIG.CBG07668	CELEG.H03A11.1	CTROP.Csp11.Scaffold558.g3808
OG0004178	CKAMA.g8431	CBRIG.CBG05220	CELEG.K03A11.5	CTROP.Csp11.Scaffold629.g10156
OG0004179	CKAMA.g8432	CBRIG.CBG05222	CELEG.K03A11.2	CTROP.Csp11.Scaffold629.g10155
OG0004180	CKAMA.g8435	CBRIG.CBG05232	CELEG.F17H10.1	CTROP.Csp11.Scaffold629.g10151
OG0004181	CKAMA.g8436	CBRIG.CBG05235	CELEG.F17H10.2	CTROP.Csp11.Scaffold629.g10150
OG0004182	CKAMA.g8437	CBRIG.CBG05236	CELEG.F17H10.3	CTROP.Csp11.Scaffold629.g10149
OG0004183	CKAMA.g8438	CBRIG.CBG05237	CELEG.F17H10.4	CTROP.Csp11.Scaffold629.g10148
OG0004184	CKAMA.g8439	CBRIG.CBG05238	CELEG.F09A5.1	CTROP.Csp11.Scaffold629.g10147
OG0004185	CKAMA.g8440	CBRIG.CBG05239	CELEG.F09A5.2	CTROP.Csp11.Scaffold629.g10146
OG0004186	CKAMA.g8441	CBRIG.CBG05243	CELEG.F09A5.3	CTROP.Csp11.Scaffold629.g10144
OG0004187	CKAMA.g8442	CBRIG.CBG05247	CELEG.F09A5.4	CTROP.Csp11.Scaffold629.g10143
OG0004188	CKAMA.g8443	CBRIG.CBG05250	CELEG.F48C11.3	CTROP.Csp11.Scaffold629.g10139
OG0004189	CKAMA.g8444	CBRIG.CBG05251	CELEG.F48C11.2	CTROP.Csp11.Scaffold629.g10138
OG0004190	CKAMA.g8445	CBRIG.CBG05252	CELEG.F48C11.1	CTROP.Csp11.Scaffold629.g10137
OG0004191	CKAMA.g8446	CBRIG.CBG05256	CELEG.R12H7.1	CTROP.Csp11.Scaffold629.g10134
OG0004192	CKAMA.g8447	CBRIG.CBG05257	CELEG.R12H7.4	CTROP.Csp11.Scaffold629.g10135
OG0004193	CKAMA.g1449	CBRIG.CBG09472	CELEG.C46G7.2	CTROP.Csp11.Scaffold538.g3332
OG0004194	CKAMA.g1450	CBRIG.CBG09470	CELEG.C46G7.4	CTROP.Csp11.Scaffold538.g3334
OG0004195	CKAMA.g16044	CBRIG.CBG11982	CELEG.C50F2.4	CTROP.Csp11.Scaffold627.g6767
OG0004196	CKAMA.g8449	CBRIG.CBG13727	CELEG.Y73F8A.2	CTROP.Csp11.Scaffold629.g9694
OG0004197	CKAMA.g8450	CBRIG.CBG13726	CELEG.Y73F8A.11	CTROP.Csp11.Scaffold629.g9692
OG0004198	CKAMA.g8451	CBRIG.CBG13725	CELEG.Y73F8A.19	CTROP.Csp11.Scaffold629.g9686
OG0004199	CKAMA.g8453	CBRIG.CBG13716	CELEG.Y73F8A.26	CTROP.Csp11.Scaffold629.g9668
OG0004200	CKAMA.g8454	CBRIG.CBG13719	CELEG.Y73F8A.24	CTROP.Csp11.Scaffold629.g9673
OG0004201	CKAMA.g8455	CBRIG.CBG13714	CELEG.Y73F8A.30	CTROP.Csp11.Scaffold629.g9670
OG0004202	CKAMA.g8458	CBRIG.CBG13700	CELEG.Y105C5A.15	CTROP.Csp11.Scaffold629.g9652
OG0004203	CKAMA.g8460	CBRIG.CBG13695	CELEG.Y105C5A.23	CTROP.Csp11.Scaffold629.g9651
OG0004204	CKAMA.g8461	CBRIG.CBG13693	CELEG.Y105C5B.21	CTROP.Csp11.Scaffold629.g9649
OG0004205	CKAMA.g8463	CBRIG.CBG13683	CELEG.T06A10.3	CTROP.Csp11.Scaffold630.g17262
OG0004206	CKAMA.g8464	CBRIG.CBG13684	CELEG.T06A10.4	CTROP.Csp11.Scaffold630.g17261
OG0004207	CKAMA.g8468	CBRIG.CBG13670	CELEG.Y51H4A.15	CTROP.Csp11.Scaffold630.g17266
OG0004208	CKAMA.g8471	CBRIG.CBG13738	CELEG.Y40H7A.10	CTROP.Csp11.Scaffold629.g9709
OG0004210	CKAMA.g8489	CBRIG.CBG13652	CELEG.Y41E3.22	CTROP.Csp11.Scaffold630.g17611
OG0004211	CKAMA.g8491	CBRIG.CBG13780	CELEG.Y41E3.3	CTROP.Csp11.Scaffold629.g9730
OG0004212	CKAMA.g8492	CBRIG.CBG13773	CELEG.Y41E3.4	CTROP.Csp11.Scaffold629.g9719
OG0004213	CKAMA.g8493	CBRIG.CBG13772	CELEG.Y41E3.7	CTROP.Csp11.Scaffold629.g9721
OG0004214	CKAMA.g8496	CBRIG.CBG13770	CELEG.Y41E3.9	CTROP.Csp11.Scaffold629.g9722
OG0004215	CKAMA.g8503	CBRIG.CBG13844	CELEG.Y57G11C.48	CTROP.Csp11.Scaffold584.g4753
OG0004216	CKAMA.g8504	CBRIG.CBG13851	CELEG.Y57G11C.47	CTROP.Csp11.Scaffold584.g4741
OG0004217	CKAMA.g8505	CBRIG.CBG13858	CELEG.Y57G11C.24	CTROP.Csp11.Scaffold630.g18701
OG0004218	CKAMA.g8506	CBRIG.CBG13861	CELEG.Y57G11C.38	CTROP.Csp11.Scaffold629.g15287
OG0004219	CKAMA.g8511	CBRIG.CBG18736	CELEG.Y64G10A.6	CTROP.Csp11.Scaffold630.g20857
OG0004220	CKAMA.g8512	CBRIG.CBG26259	CELEG.Y64G10A.7	CTROP.Csp11.Scaffold479.g1810
OG0004221	CKAMA.g8513	CBRIG.CBG21633	CELEG.Y67A10A.11	CTROP.Csp11.Scaffold629.g10305
OG0004222	CKAMA.g8515	CBRIG.CBG21629	CELEG.Y67A10A.7	CTROP.Csp11.Scaffold629.g16050
OG0004223	CKAMA.g8517	CBRIG.CBG21625	CELEG.Y67A10A.9	CTROP.Csp11.Scaffold630.g19722
OG0004224	CKAMA.g8518	CBRIG.CBG21624	CELEG.F55B11.1	CTROP.Csp11.Scaffold630.g19681
OG0004225	CKAMA.g8521	CBRIG.CBG21580	CELEG.LLC1.1	CTROP.Csp11.Scaffold630.g19635
OG0004226	CKAMA.g8522	CBRIG.CBG21578	CELEG.LLC1.2	CTROP.Csp11.Scaffold630.g19632
OG0004227	CKAMA.g8524	CBRIG.CBG21575	CELEG.Y57G11A.4	CTROP.Csp11.Scaffold630.g19631
OG0004228	CKAMA.g8525	CBRIG.CBG21574	CELEG.Y57G11A.1	CTROP.Csp11.Scaffold630.g19628
OG0004229	CKAMA.g8526	CBRIG.CBG21571	CELEG.Y57G11B.6	CTROP.Csp11.Scaffold630.g19627
OG0004230	CKAMA.g8527	CBRIG.CBG21570	CELEG.Y57G11B.2	CTROP.Csp11.Scaffold630.g19626
OG0004231	CKAMA.g8528	CBRIG.CBG30474	CELEG.Y57G11B.97	CTROP.Csp11.Scaffold630.g19625
OG0004232	CKAMA.g8533	CBRIG.CBG21552	CELEG.F13G11.1	CTROP.Csp11.Scaffold489.g2057
OG0004233	CKAMA.g8534	CBRIG.CBG21549	CELEG.Y57G11C.39	CTROP.Csp11.Scaffold630.g21233
OG0004234	CKAMA.g8535	CBRIG.CBG21547	CELEG.Y57G11C.37	CTROP.Csp11.Scaffold630.g21235
OG0004235	CKAMA.g8536	CBRIG.CBG21542	CELEG.Y57G11C.32	CTROP.Csp11.Scaffold630.g21237
OG0004236	CKAMA.g8538	CBRIG.CBG21529	CELEG.Y57G11C.42	CTROP.Csp11.Scaffold630.g21247
OG0004237	CKAMA.g8539	CBRIG.CBG21527	CELEG.Y57G11C.4	CTROP.Csp11.Scaffold630.g21249
OG0004238	CKAMA.g8540	CBRIG.CBG21526	CELEG.Y57G11C.34	CTROP.Csp11.Scaffold630.g21250
OG0004239	CKAMA.g8541	CBRIG.CBG21525	CELEG.Y57G11C.3	CTROP.Csp11.Scaffold630.g21251
OG0004240	CKAMA.g8542	CBRIG.CBG21524	CELEG.Y57G11C.43	CTROP.Csp11.Scaffold630.g21252
OG0004241	CKAMA.g8544	CBRIG.CBG21520	CELEG.Y57G11C.8	CTROP.Csp11.Scaffold630.g21255
OG0004242	CKAMA.g8545	CBRIG.CBG21518	CELEG.Y57G11C.45	CTROP.Csp11.Scaffold630.g21257
OG0004243	CKAMA.g8546	CBRIG.CBG21517	CELEG.Y57G11C.9	CTROP.Csp11.Scaffold630.g21258
OG0004244	CKAMA.g8549	CBRIG.CBG21516	CELEG.Y57G11C.10	CTROP.Csp11.Scaffold630.g21259
OG0004245	CKAMA.g8551	CBRIG.CBG21512	CELEG.Y57G11C.12	CTROP.Csp11.Scaffold630.g21261
OG0004246	CKAMA.g8552	CBRIG.CBG21511	CELEG.Y57G11C.13	CTROP.Csp11.Scaffold630.g21262
OG0004247	CKAMA.g8554	CBRIG.CBG21509	CELEG.Y57G11C.46	CTROP.Csp11.Scaffold629.g15274
OG0004248	CKAMA.g8556	CBRIG.CBG21507	CELEG.Y57G11C.16	CTROP.Csp11.Scaffold629.g15278
OG0004249	CKAMA.g8557	CBRIG.CBG21501	CELEG.Y57G11C.17	CTROP.Csp11.Scaffold629.g15279
OG0004250	CKAMA.g8560	CBRIG.CBG18029	CELEG.F10F2.1	CTROP.Csp11.Scaffold478.g1762
OG0004251	CKAMA.g8561	CBRIG.CBG18028	CELEG.F10F2.3	CTROP.Csp11.Scaffold478.g1766
OG0004252	CKAMA.g16057	CBRIG.CBG20001	CELEG.C24D10.4	CTROP.Csp11.Scaffold629.g8103
OG0004253	CKAMA.g8570	CBRIG.CBG11890	CELEG.T25G3.1	CTROP.Csp11.Scaffold630.g21022
OG0004254	CKAMA.g8571	CBRIG.CBG11888	CELEG.C26C6.5	CTROP.Csp11.Scaffold630.g21024
OG0004255	CKAMA.g8573	CBRIG.CBG11886	CELEG.C26C6.3	CTROP.Csp11.Scaffold630.g21004
OG0004256	CKAMA.g8575	CBRIG.CBG19439	CELEG.T28B8.6	CTROP.Csp11.Scaffold629.g8142
OG0004257	CKAMA.g8578	CBRIG.CBG26614	CELEG.F58H10.1	CTROP.Csp11.Scaffold629.g8147
OG0004258	CKAMA.g8580	CBRIG.CBG00292	CELEG.F27D4.4	CTROP.Csp11.Scaffold629.g8154
OG0004259	CKAMA.g8581	CBRIG.CBG00291	CELEG.F27D4.7	CTROP.Csp11.Scaffold629.g8155
OG0004260	CKAMA.g8582	CBRIG.CBG00300	CELEG.F27D4.2	CTROP.Csp11.Scaffold629.g8157
OG0004261	CKAMA.g8583	CBRIG.CBG00301	CELEG.F27D4.1	CTROP.Csp11.Scaffold629.g8158
OG0004262	CKAMA.g8584	CBRIG.CBG00302	CELEG.T23G11.1	CTROP.Csp11.Scaffold629.g8159
OG0004263	CKAMA.g8585	CBRIG.CBG19292	CELEG.T23G11.2	CTROP.Csp11.Scaffold629.g14528
OG0004264	CKAMA.g8587	CBRIG.CBG00303	CELEG.T23G11.3	CTROP.Csp11.Scaffold589.g4961
OG0004265	CKAMA.g8588	CBRIG.CBG00304	CELEG.T23G11.4	CTROP.Csp11.Scaffold630.g16893
OG0004266	CKAMA.g8590	CBRIG.CBG00306	CELEG.T23G11.6	CTROP.Csp11.Scaffold630.g16891
OG0004267	CKAMA.g8591	CBRIG.CBG00305	CELEG.T23G11.5	CTROP.Csp11.Scaffold630.g16886
OG0004268	CKAMA.g8592	CBRIG.CBG00309	CELEG.T24B1.1	CTROP.Csp11.Scaffold630.g16889
OG0004269	CKAMA.g8593	CBRIG.CBG00310	CELEG.F26A3.7	CTROP.Csp11.Scaffold630.g16890
OG0004270	CKAMA.g8594	CBRIG.CBG00319	CELEG.T28B8.5	CTROP.Csp11.Scaffold630.g16883
OG0004271	CKAMA.g8596	CBRIG.CBG11841	CELEG.C09H6.3	CTROP.Csp11.Scaffold630.g16894
OG0004272	CKAMA.g8597	CBRIG.CBG11848	CELEG.C09H6.2	CTROP.Csp11.Scaffold529.g3143
OG0004273	CKAMA.g8599	CBRIG.CBG08264	CELEG.F55D12.1	CTROP.Csp11.Scaffold629.g7502
OG0004274	CKAMA.g8600	CBRIG.CBG08262	CELEG.F55D12.2	CTROP.Csp11.Scaffold629.g7500
OG0004275	CKAMA.g8601	CBRIG.CBG08257	CELEG.T22C1.7	CTROP.Csp11.Scaffold80.g507
OG0004276	CKAMA.g8602	CBRIG.CBG08254	CELEG.T22C1.6	CTROP.Csp11.Scaffold498.g2229
OG0004277	CKAMA.g8603	CBRIG.CBG25324	CELEG.T22C1.5	CTROP.Csp11.Scaffold498.g2230
OG0004278	CKAMA.g8604	CBRIG.CBG08253	CELEG.T22C1.3	CTROP.Csp11.Scaffold498.g2232
OG0004279	CKAMA.g8606	CBRIG.CBG08251	CELEG.T22C1.1	CTROP.Csp11.Scaffold498.g2233
OG0004280	CKAMA.g8608	CBRIG.CBG08249	CELEG.F20G4.1	CTROP.Csp11.Scaffold498.g2235
OG0004281	CKAMA.g8613	CBRIG.CBG08244	CELEG.F55D12.4	CTROP.Csp11.Scaffold498.g2228
OG0004282	CKAMA.g8615	CBRIG.CBG19959	CELEG.F41H10.6	CTROP.Csp11.Scaffold494.g2171
OG0004283	CKAMA.g8616	CBRIG.CBG19958	CELEG.F41H10.4	CTROP.Csp11.Scaffold494.g2170
OG0004284	CKAMA.g8618	CBRIG.CBG19955	CELEG.F41H10.7	CTROP.Csp11.Scaffold494.g2165
OG0004285	CKAMA.g16074	CBRIG.CBG22152	CELEG.Y71G12B.12	CTROP.Csp11.Scaffold630.g19602
OG0004286	CKAMA.g16078	CBRIG.CBG20020	CELEG.C33A12.1	CTROP.Csp11.Scaffold629.g8215
OG0004287	CKAMA.g16080	CBRIG.CBG06912	CELEG.K02D10.5	CTROP.Csp11.Scaffold630.g19608
OG0004288	CKAMA.g16084	CBRIG.CBG12047	CELEG.T20F5.7	CTROP.Csp11.Scaffold627.g6710
OG0004289	CKAMA.g1458	CBRIG.CBG30951	CELEG.C54D10.13	CTROP.Csp11.Scaffold630.g19406
OG0004290	CKAMA.g1459	CBRIG.CBG23488	CELEG.C54D10.5	CTROP.Csp11.Scaffold630.g19405
OG0004291	CKAMA.g1461	CBRIG.CBG23486	CELEG.C54D10.4	CTROP.Csp11.Scaffold600.g5412
OG0004292	CKAMA.g8621	CBRIG.CBG08034	CELEG.Y87G2A.4	CTROP.Csp11.Scaffold630.g20996
OG0004293	CKAMA.g8622	CBRIG.CBG08040	CELEG.Y87G2A.15	CTROP.Csp11.Scaffold630.g20995
OG0004294	CKAMA.g8625	CBRIG.CBG19781	CELEG.Y87G2A.11	CTROP.Csp11.Scaffold630.g20989
OG0004296	CKAMA.g8632	CBRIG.CBG02640	CELEG.K10B2.1	CTROP.Csp11.Scaffold629.g11587
OG0004297	CKAMA.g8633	CBRIG.CBG02639	CELEG.K10B2.2	CTROP.Csp11.Scaffold629.g11586
OG0004298	CKAMA.g16119	CBRIG.CBG21978	CELEG.F56D3.1	CTROP.Csp11.Scaffold629.g13186
OG0004299	CKAMA.g16120	CBRIG.CBG21979	CELEG.T08H4.3	CTROP.Csp11.Scaffold629.g13184
OG0004300	CKAMA.g16121	CBRIG.CBG18446	CELEG.T08H4.1	CTROP.Csp11.Scaffold500.g2267
OG0004301	CKAMA.g16124	CBRIG.CBG18457	CELEG.R11F4.2	CTROP.Csp11.Scaffold629.g13217
OG0004302	CKAMA.g16125	CBRIG.CBG26164	CELEG.W06A11.1	CTROP.Csp11.Scaffold500.g2284
OG0004303	CKAMA.g16127	CBRIG.CBG23951	CELEG.K07D4.8	CTROP.Csp11.Scaffold500.g2282
OG0004304	CKAMA.g16128	CBRIG.CBG23953	CELEG.K07D4.4	CTROP.Csp11.Scaffold500.g2281
OG0004305	CKAMA.g16129	CBRIG.CBG23955	CELEG.K07D4.5	CTROP.Csp11.Scaffold500.g2277
OG0004306	CKAMA.g16130	CBRIG.CBG23956	CELEG.K07D4.6	CTROP.Csp11.Scaffold500.g2278
OG0004307	CKAMA.g16131	CBRIG.CBG23957	CELEG.K07D4.7	CTROP.Csp11.Scaffold500.g2279
OG0004308	CKAMA.g8637	CBRIG.CBG07067	CELEG.W10D9.4	CTROP.Csp11.Scaffold605.g5647
OG0004309	CKAMA.g8638	CBRIG.CBG07066	CELEG.W10D9.5	CTROP.Csp11.Scaffold605.g5648
OG0004310	CKAMA.g8639	CBRIG.CBG07065	CELEG.W07E6.1	CTROP.Csp11.Scaffold605.g5649
OG0004311	CKAMA.g8642	CBRIG.CBG07082	CELEG.C09E8.2	CTROP.Csp11.Scaffold605.g5643
OG0004312	CKAMA.g8643	CBRIG.CBG07071	CELEG.C09E8.1	CTROP.Csp11.Scaffold605.g5642
OG0004314	CKAMA.g16138	CBRIG.CBG13499	CELEG.C04G2.6	CTROP.Csp11.Scaffold629.g10690
OG0004315	CKAMA.g16139	CBRIG.CBG02871	CELEG.B0334.6	CTROP.Csp11.Scaffold554.g3695
OG0004316	CKAMA.g16140	CBRIG.CBG19870	CELEG.C45E5.6	CTROP.Csp11.Scaffold510.g2545
OG0004317	CKAMA.g8645	CBRIG.CBG18187	CELEG.F26F4.1	CTROP.Csp11.Scaffold629.g14361
OG0004318	CKAMA.g8646	CBRIG.CBG18188	CELEG.F26F4.10	CTROP.Csp11.Scaffold629.g14362
OG0004319	CKAMA.g8648	CBRIG.CBG18190	CELEG.C26E6.8	CTROP.Csp11.Scaffold629.g14364
OG0004320	CKAMA.g8650	CBRIG.CBG18192	CELEG.C26E6.9	CTROP.Csp11.Scaffold629.g14366
OG0004321	CKAMA.g8651	CBRIG.CBG30265	CELEG.C26E6.12	CTROP.Csp11.Scaffold629.g14369
OG0004322	CKAMA.g8652	CBRIG.CBG18195	CELEG.C26E6.6	CTROP.Csp11.Scaffold629.g14371
OG0004323	CKAMA.g8653	CBRIG.CBG18196	CELEG.C26E6.5	CTROP.Csp11.Scaffold629.g14372
OG0004324	CKAMA.g8654	CBRIG.CBG18197	CELEG.C26E6.4	CTROP.Csp11.Scaffold629.g14373
OG0004325	CKAMA.g8655	CBRIG.CBG18198	CELEG.C26E6.3	CTROP.Csp11.Scaffold629.g14374
OG0004326	CKAMA.g8656	CBRIG.CBG18201	CELEG.C26E6.2	CTROP.Csp11.Scaffold629.g14375
OG0004327	CKAMA.g8659	CBRIG.CBG18211	CELEG.C27F2.10	CTROP.Csp11.Scaffold629.g14385
OG0004328	CKAMA.g8660	CBRIG.CBG16532	CELEG.C27F2.1	CTROP.Csp11.Scaffold629.g14386
OG0004329	CKAMA.g8661	CBRIG.CBG16531	CELEG.C27F2.8	CTROP.Csp11.Scaffold629.g14387
OG0004330	CKAMA.g8662	CBRIG.CBG16529	CELEG.R144.5	CTROP.Csp11.Scaffold629.g14388
OG0004331	CKAMA.g8665	CBRIG.CBG11722	CELEG.Y82E9BR.18	CTROP.Csp11.Scaffold629.g14351
OG0004332	CKAMA.g8666	CBRIG.CBG11726	CELEG.M01G5.1	CTROP.Csp11.Scaffold629.g14355
OG0004333	CKAMA.g8667	CBRIG.CBG11720	CELEG.M01G5.5	CTROP.Csp11.Scaffold630.g17458
OG0004334	CKAMA.g8668	CBRIG.CBG11721	CELEG.Y67D2.4	CTROP.Csp11.Scaffold528.g3124
OG0004335	CKAMA.g8671	CBRIG.CBG25632	CELEG.F59G1.2	CTROP.Csp11.Scaffold630.g19445
OG0004336	CKAMA.g8672	CBRIG.CBG02532	CELEG.F59G1.4	CTROP.Csp11.Scaffold630.g19443
OG0004337	CKAMA.g8673	CBRIG.CBG02531	CELEG.F55C12.1	CTROP.Csp11.Scaffold630.g19442
OG0004338	CKAMA.g8679	CBRIG.CBG11862	CELEG.F23B12.8	CTROP.Csp11.Scaffold630.g20347
OG0004339	CKAMA.g16160	CBRIG.CBG20108	CELEG.W03F8.9	CTROP.Csp11.Scaffold41.g214
OG0004341	CKAMA.g8692	CBRIG.CBG13182	CELEG.W09D6.6	CTROP.Csp11.Scaffold596.g5300
OG0004342	CKAMA.g8693	CBRIG.CBG13181	CELEG.W09D6.5	CTROP.Csp11.Scaffold596.g5299
OG0004343	CKAMA.g8694	CBRIG.CBG18819	CELEG.K03D10.1	CTROP.Csp11.Scaffold525.g3010
OG0004344	CKAMA.g1483	CBRIG.CBG23006	CELEG.F54D8.2	CTROP.Csp11.Scaffold629.g14491
OG0004345	CKAMA.g1484	CBRIG.CBG23005	CELEG.F54D8.4	CTROP.Csp11.Scaffold629.g14490
OG0004346	CKAMA.g1486	CBRIG.CBG11692	CELEG.Y49E10.20	CTROP.Csp11.Scaffold629.g8742
OG0004348	CKAMA.g16173	CBRIG.CBG03334	CELEG.F08G5.4	CTROP.Csp11.Scaffold629.g12688
OG0004349	CKAMA.g16175	CBRIG.CBG03338	CELEG.C25G4.2	CTROP.Csp11.Scaffold629.g12683
OG0004350	CKAMA.g16176	CBRIG.CBG03339	CELEG.C25G4.3	CTROP.Csp11.Scaffold629.g12682
OG0004351	CKAMA.g16177	CBRIG.CBG03340	CELEG.C25G4.5	CTROP.Csp11.Scaffold629.g12681
OG0004352	CKAMA.g16180	CBRIG.CBG20604	CELEG.C33F10.7	CTROP.Csp11.Scaffold629.g11180
OG0004353	CKAMA.g8697	CBRIG.CBG14874	CELEG.Y119C1B.5	CTROP.Csp11.Scaffold617.g6046
OG0004354	CKAMA.g8698	CBRIG.CBG14873	CELEG.Y119C1B.4	CTROP.Csp11.Scaffold617.g6045
OG0004355	CKAMA.g8700	CBRIG.CBG14867	CELEG.K07A12.2	CTROP.Csp11.Scaffold617.g6049
OG0004356	CKAMA.g8701	CBRIG.CBG14871	CELEG.K07A12.1	CTROP.Csp11.Scaffold630.g22309
OG0004357	CKAMA.g8702	CBRIG.CBG14872	CELEG.F39H2.3	CTROP.Csp11.Scaffold630.g22308
OG0004358	CKAMA.g8703	CBRIG.CBG22249	CELEG.F39H2.4	CTROP.Csp11.Scaffold630.g22307
OG0004359	CKAMA.g8704	CBRIG.CBG22250	CELEG.Y119C1B.3	CTROP.Csp11.Scaffold630.g22306
OG0004360	CKAMA.g8705	CBRIG.CBG22251	CELEG.D1007.15	CTROP.Csp11.Scaffold630.g22304
OG0004361	CKAMA.g8706	CBRIG.CBG22252	CELEG.Y119C1B.10	CTROP.Csp11.Scaffold630.g22303
OG0004362	CKAMA.g8707	CBRIG.CBG22253	CELEG.D1007.14	CTROP.Csp11.Scaffold630.g22313
OG0004363	CKAMA.g8708	CBRIG.CBG22254	CELEG.D1007.13	CTROP.Csp11.Scaffold630.g22312
OG0004364	CKAMA.g8709	CBRIG.CBG12015	CELEG.T12F5.3	CTROP.Csp11.Scaffold627.g6732
OG0004365	CKAMA.g8710	CBRIG.CBG14894	CELEG.M01E11.2	CTROP.Csp11.Scaffold629.g15133
OG0004366	CKAMA.g8713	CBRIG.CBG14907	CELEG.M01E11.7	CTROP.Csp11.Scaffold629.g15134
OG0004367	CKAMA.g8714	CBRIG.CBG14905	CELEG.F46F11.4	CTROP.Csp11.Scaffold629.g15139
OG0004368	CKAMA.g8715	CBRIG.CBG14904	CELEG.F46F11.5	CTROP.Csp11.Scaffold629.g15141
OG0004369	CKAMA.g8716	CBRIG.CBG14902	CELEG.F46F11.9	CTROP.Csp11.Scaffold629.g15142
OG0004370	CKAMA.g8718	CBRIG.CBG14900	CELEG.F46F11.7	CTROP.Csp11.Scaffold629.g15144
OG0004371	CKAMA.g8720	CBRIG.CBG14898	CELEG.F46F11.8	CTROP.Csp11.Scaffold629.g15160
OG0004372	CKAMA.g8723	CBRIG.CBG14896	CELEG.F46F11.1	CTROP.Csp11.Scaffold629.g15161
OG0004373	CKAMA.g8726	CBRIG.CBG14919	CELEG.T19B4.1	CTROP.Csp11.Scaffold629.g15163
OG0004374	CKAMA.g8727	CBRIG.CBG14918	CELEG.T19B4.2	CTROP.Csp11.Scaffold629.g15164
OG0004375	CKAMA.g8728	CBRIG.CBG14917	CELEG.T19B4.7	CTROP.Csp11.Scaffold629.g15165
OG0004376	CKAMA.g8730	CBRIG.CBG14915	CELEG.T19B4.4	CTROP.Csp11.Scaffold629.g15170
OG0004377	CKAMA.g8731	CBRIG.CBG14914	CELEG.T19B4.5	CTROP.Csp11.Scaffold629.g15169
OG0004378	CKAMA.g8732	CBRIG.CBG14913	CELEG.F55F8.9	CTROP.Csp11.Scaffold629.g15168
OG0004379	CKAMA.g8733	CBRIG.CBG14912	CELEG.F55F8.8	CTROP.Csp11.Scaffold629.g15166
OG0004380	CKAMA.g8734	CBRIG.CBG14920	CELEG.F55F8.1	CTROP.Csp11.Scaffold629.g15167
OG0004381	CKAMA.g8736	CBRIG.CBG12754	CELEG.H27M09.4	CTROP.Csp11.Scaffold539.g3359
OG0004382	CKAMA.g8737	CBRIG.CBG12755	CELEG.K02F2.1	CTROP.Csp11.Scaffold539.g3358
OG0004383	CKAMA.g8740	CBRIG.CBG12758	CELEG.K02F2.6	CTROP.Csp11.Scaffold539.g3351
OG0004384	CKAMA.g8741	CBRIG.CBG12757	CELEG.K02F2.3	CTROP.Csp11.Scaffold539.g3350
OG0004385	CKAMA.g8742	CBRIG.CBG12763	CELEG.K02F2.5	CTROP.Csp11.Scaffold539.g3348
OG0004386	CKAMA.g8744	CBRIG.CBG29945	CELEG.E02D9.1	CTROP.Csp11.Scaffold539.g3347
OG0004387	CKAMA.g8745	CBRIG.CBG12766	CELEG.C37A2.8	CTROP.Csp11.Scaffold539.g3346
OG0004388	CKAMA.g8747	CBRIG.CBG08359	CELEG.F37C12.7	CTROP.Csp11.Scaffold489.g2052
OG0004389	CKAMA.g16186	CBRIG.CBG23019	CELEG.Y75B8A.9	CTROP.Csp11.Scaffold629.g14508
OG0004390	CKAMA.g8750	CBRIG.CBG16609	CELEG.K04G7.1	CTROP.Csp11.Scaffold489.g2053
OG0004391	CKAMA.g16190	CBRIG.CBG08386	CELEG.F01D4.6	CTROP.Csp11.Scaffold630.g17777
OG0004392	CKAMA.g16191	CBRIG.CBG02822	CELEG.F15D4.4	CTROP.Csp11.Scaffold629.g9756
OG0004393	CKAMA.g1488	CBRIG.CBG01258	CELEG.Y5H2B.5	CTROP.Csp11.Scaffold566.g4123
OG0004394	CKAMA.g16205	CBRIG.CBG02384	CELEG.EEED8.8	CTROP.Csp11.Scaffold629.g11457
OG0004395	CKAMA.g16206	CBRIG.CBG02380	CELEG.F09E5.2	CTROP.Csp11.Scaffold629.g11464
OG0004396	CKAMA.g8752	CBRIG.CBG19860	CELEG.C31H1.6	CTROP.Csp11.Scaffold499.g2262
OG0004397	CKAMA.g16210	CBRIG.CBG05655	CELEG.Y59A8A.1	CTROP.Csp11.Scaffold630.g21871
OG0004398	CKAMA.g8757	CBRIG.CBG18044	CELEG.M88.4	CTROP.Csp11.Scaffold544.g3442
OG0004399	CKAMA.g8758	CBRIG.CBG18045	CELEG.M88.7	CTROP.Csp11.Scaffold544.g3441
OG0004400	CKAMA.g8759	CBRIG.CBG18046	CELEG.M88.2	CTROP.Csp11.Scaffold544.g3440
OG0004401	CKAMA.g8760	CBRIG.CBG13180	CELEG.F25F2.1	CTROP.Csp11.Scaffold544.g3437
OG0004402	CKAMA.g1497	CBRIG.CBG23222	CELEG.T11F9.11	CTROP.Csp11.Scaffold629.g7498
OG0004403	CKAMA.g1498	CBRIG.CBG30684	CELEG.T11F9.21	CTROP.Csp11.Scaffold629.g16635
OG0004404	CKAMA.g1500	CBRIG.CBG23229	CELEG.C55A6.2	CTROP.Csp11.Scaffold629.g16626
OG0004405	CKAMA.g1512	CBRIG.CBG23235	CELEG.F38B7.1	CTROP.Csp11.Scaffold629.g16632
OG0004406	CKAMA.g1514	CBRIG.CBG23232	CELEG.C55A6.9	CTROP.Csp11.Scaffold629.g16630
OG0004407	CKAMA.g8771	CBRIG.CBG16576	CELEG.F37A4.7	CTROP.Csp11.Scaffold629.g14481
OG0004408	CKAMA.g16229	CBRIG.CBG18371	CELEG.F43D9.4	CTROP.Csp11.Scaffold628.g7337
OG0004409	CKAMA.g8775	CBRIG.CBG24890	CELEG.Y44F5A.1	CTROP.Csp11.Scaffold629.g12550
OG0004410	CKAMA.g8776	CBRIG.CBG08238	CELEG.T22C1.10	CTROP.Csp11.Scaffold80.g504
OG0004411	CKAMA.g8780	CBRIG.CBG08236	CELEG.C54G4.4	CTROP.Csp11.Scaffold629.g14914
OG0004412	CKAMA.g8782	CBRIG.CBG10763	CELEG.W01A8.1	CTROP.Csp11.Scaffold542.g3412
OG0004413	CKAMA.g8783	CBRIG.CBG20465	CELEG.K07G5.5	CTROP.Csp11.Scaffold629.g14769
OG0004414	CKAMA.g8784	CBRIG.CBG20464	CELEG.K07G5.4	CTROP.Csp11.Scaffold629.g14767
OG0004415	CKAMA.g8787	CBRIG.CBG20460	CELEG.K07G5.1	CTROP.Csp11.Scaffold629.g14762
OG0004417	CKAMA.g8789	CBRIG.CBG10807	CELEG.C46H11.10	CTROP.Csp11.Scaffold629.g9746
OG0004418	CKAMA.g8790	CBRIG.CBG20463	CELEG.K07G5.3	CTROP.Csp11.Scaffold629.g14766
OG0004419	CKAMA.g8795	CBRIG.CBG10801	CELEG.C30F8.4	CTROP.Csp11.Scaffold625.g6339
OG0004420	CKAMA.g8796	CBRIG.CBG10809	CELEG.C30F8.3	CTROP.Csp11.Scaffold542.g3414
OG0004421	CKAMA.g8797	CBRIG.CBG10812	CELEG.Y110A7A.13	CTROP.Csp11.Scaffold542.g3416
OG0004422	CKAMA.g8798	CBRIG.CBG10813	CELEG.Y110A7A.14	CTROP.Csp11.Scaffold542.g3415
OG0004423	CKAMA.g8800	CBRIG.CBG29970	CELEG.Y110A7A.21	CTROP.Csp11.Scaffold542.g3422
OG0004424	CKAMA.g8802	CBRIG.CBG10825	CELEG.Y110A7A.16	CTROP.Csp11.Scaffold449.g1284
OG0004425	CKAMA.g8805	CBRIG.CBG10826	CELEG.Y110A7A.9	CTROP.Csp11.Scaffold629.g11105
OG0004426	CKAMA.g8807	CBRIG.CBG10828	CELEG.Y110A7A.8	CTROP.Csp11.Scaffold629.g14845
OG0004427	CKAMA.g8808	CBRIG.CBG10830	CELEG.Y110A7A.6	CTROP.Csp11.Scaffold630.g19721
OG0004428	CKAMA.g8810	CBRIG.CBG23748	CELEG.Y110A7A.2	CTROP.Csp11.Scaffold630.g19719
OG0004429	CKAMA.g8811	CBRIG.CBG23747	CELEG.Y110A7A.3	CTROP.Csp11.Scaffold630.g19718
OG0004430	CKAMA.g8815	CBRIG.CBG23744	CELEG.Y110A7A.1	CTROP.Csp11.Scaffold630.g19715
OG0004431	CKAMA.g8816	CBRIG.CBG23745	CELEG.Y110A7A.19	CTROP.Csp11.Scaffold630.g19716
OG0004432	CKAMA.g16242	CBRIG.CBG09996	CELEG.R10E11.9	CTROP.Csp11.Scaffold629.g9436
OG0004433	CKAMA.g8819	CBRIG.CBG03820	CELEG.T23D8.9	CTROP.Csp11.Scaffold629.g10901
OG0004434	CKAMA.g8820	CBRIG.CBG03821	CELEG.T23D8.4	CTROP.Csp11.Scaffold629.g10902
OG0004435	CKAMA.g8821	CBRIG.CBG03822	CELEG.T23D8.3	CTROP.Csp11.Scaffold629.g10903
OG0004436	CKAMA.g8822	CBRIG.CBG03823	CELEG.T23D8.2	CTROP.Csp11.Scaffold629.g10910
OG0004437	CKAMA.g8825	CBRIG.CBG03827	CELEG.T24D1.2	CTROP.Csp11.Scaffold629.g10913
OG0004438	CKAMA.g8826	CBRIG.CBG03828	CELEG.T24D1.1	CTROP.Csp11.Scaffold629.g14803
OG0004439	CKAMA.g8828	CBRIG.CBG03830	CELEG.Y106G6A.1	CTROP.Csp11.Scaffold629.g14795
OG0004440	CKAMA.g8829	CBRIG.CBG03832	CELEG.Y106G6A.2	CTROP.Csp11.Scaffold629.g14791
OG0004441	CKAMA.g8834	CBRIG.CBG12512	CELEG.R05D11.3	CTROP.Csp11.Scaffold630.g20447
OG0004442	CKAMA.g8835	CBRIG.CBG12511	CELEG.R05D11.5	CTROP.Csp11.Scaffold630.g20448
OG0004443	CKAMA.g8836	CBRIG.CBG12510	CELEG.R05D11.9	CTROP.Csp11.Scaffold630.g20449
OG0004444	CKAMA.g8837	CBRIG.CBG12508	CELEG.R05D11.4	CTROP.Csp11.Scaffold630.g20451
OG0004445	CKAMA.g8839	CBRIG.CBG12506	CELEG.R05D11.8	CTROP.Csp11.Scaffold630.g20454
OG0004446	CKAMA.g8841	CBRIG.CBG12505	CELEG.F43G9.13	CTROP.Csp11.Scaffold630.g20455
OG0004447	CKAMA.g8842	CBRIG.CBG12504	CELEG.F43G9.1	CTROP.Csp11.Scaffold630.g20456
OG0004448	CKAMA.g8843	CBRIG.CBG12503	CELEG.F43G9.2	CTROP.Csp11.Scaffold630.g20457
OG0004449	CKAMA.g8845	CBRIG.CBG12501	CELEG.F43G9.3	CTROP.Csp11.Scaffold630.g20458
OG0004450	CKAMA.g8846	CBRIG.CBG12500	CELEG.F43G9.5	CTROP.Csp11.Scaffold630.g20459
OG0004451	CKAMA.g8849	CBRIG.CBG12498	CELEG.F43G9.9	CTROP.Csp11.Scaffold630.g20464
OG0004452	CKAMA.g8850	CBRIG.CBG12497	CELEG.F43G9.10	CTROP.Csp11.Scaffold630.g20465
OG0004453	CKAMA.g8851	CBRIG.CBG12496	CELEG.F43G9.12	CTROP.Csp11.Scaffold630.g20466
OG0004454	CKAMA.g8852	CBRIG.CBG12495	CELEG.VF39H2L.1	CTROP.Csp11.Scaffold630.g20467
OG0004455	CKAMA.g8853	CBRIG.CBG12494	CELEG.F39H2.2	CTROP.Csp11.Scaffold630.g20468
OG0004456	CKAMA.g8855	CBRIG.CBG12487	CELEG.F59A3.1	CTROP.Csp11.Scaffold630.g20471
OG0004457	CKAMA.g16244	CBRIG.CBG02466	CELEG.F59E12.13	CTROP.Csp11.Scaffold629.g11353
OG0004458	CKAMA.g8856	CBRIG.CBG15112	CELEG.Y22D7AR.13	CTROP.Csp11.Scaffold630.g17374
OG0004459	CKAMA.g8857	CBRIG.CBG15730	CELEG.H10E21.3	CTROP.Csp11.Scaffold630.g16722
OG0004460	CKAMA.g8864	CBRIG.CBG15132	CELEG.Y46E12A.4	CTROP.Csp11.Scaffold630.g17386
OG0004461	CKAMA.g8866	CBRIG.CBG18216	CELEG.K04C2.4	CTROP.Csp11.Scaffold629.g14444
OG0004462	CKAMA.g8867	CBRIG.CBG18218	CELEG.K04C2.2	CTROP.Csp11.Scaffold629.g14443
OG0004463	CKAMA.g8868	CBRIG.CBG18219	CELEG.T07E3.4	CTROP.Csp11.Scaffold629.g14442
OG0004464	CKAMA.g8870	CBRIG.CBG18221	CELEG.T07E3.3	CTROP.Csp11.Scaffold629.g14440
OG0004465	CKAMA.g8872	CBRIG.CBG16474	CELEG.T07E3.6	CTROP.Csp11.Scaffold629.g14436
OG0004466	CKAMA.g8873	CBRIG.CBG16477	CELEG.F57B9.7	CTROP.Csp11.Scaffold629.g14434
OG0004467	CKAMA.g8875	CBRIG.CBG16479	CELEG.F57B9.5	CTROP.Csp11.Scaffold629.g14432
OG0004469	CKAMA.g8878	CBRIG.CBG16482	CELEG.F57B9.9	CTROP.Csp11.Scaffold629.g14429
OG0004470	CKAMA.g8882	CBRIG.CBG15109	CELEG.Y48G9A.8	CTROP.Csp11.Scaffold575.g4448
OG0004471	CKAMA.g8883	CBRIG.CBG15124	CELEG.Y39A3B.2	CTROP.Csp11.Scaffold630.g17381
OG0004472	CKAMA.g8888	CBRIG.CBG15648	CELEG.C39B5.5	CTROP.Csp11.Scaffold630.g20153
OG0004473	CKAMA.g8889	CBRIG.CBG15650	CELEG.Y48G9A.4	CTROP.Csp11.Scaffold630.g20163
OG0004474	CKAMA.g8892	CBRIG.CBG22950	CELEG.C06G4.5	CTROP.Csp11.Scaffold629.g9562
OG0004475	CKAMA.g8899	CBRIG.CBG22940	CELEG.F54H12.7	CTROP.Csp11.Scaffold630.g18569
OG0004476	CKAMA.g8900	CBRIG.CBG22937	CELEG.F22B7.1	CTROP.Csp11.Scaffold630.g18562
OG0004477	CKAMA.g8901	CBRIG.CBG22936	CELEG.F22B7.10	CTROP.Csp11.Scaffold630.g18563
OG0004478	CKAMA.g8903	CBRIG.CBG22935	CELEG.F22B7.9	CTROP.Csp11.Scaffold630.g18555
OG0004479	CKAMA.g8904	CBRIG.CBG26101	CELEG.F22B7.2	CTROP.Csp11.Scaffold630.g18556
OG0004480	CKAMA.g8907	CBRIG.CBG12630	CELEG.T23H2.4	CTROP.Csp11.Scaffold630.g20343
OG0004481	CKAMA.g8908	CBRIG.CBG12631	CELEG.T23H2.5	CTROP.Csp11.Scaffold630.g20342
OG0004482	CKAMA.g8909	CBRIG.CBG12632	CELEG.K06A5.4	CTROP.Csp11.Scaffold630.g20341
OG0004483	CKAMA.g8912	CBRIG.CBG12674	CELEG.C55B7.12	CTROP.Csp11.Scaffold583.g4726
OG0004484	CKAMA.g8913	CBRIG.CBG12645	CELEG.C55B7.2	CTROP.Csp11.Scaffold583.g4730
OG0004485	CKAMA.g8916	CBRIG.CBG12641	CELEG.C55B7.8	CTROP.Csp11.Scaffold583.g4735
OG0004486	CKAMA.g8917	CBRIG.CBG12638	CELEG.K06A5.8	CTROP.Csp11.Scaffold583.g4734
OG0004487	CKAMA.g8918	CBRIG.CBG12639	CELEG.C55B7.6	CTROP.Csp11.Scaffold583.g4732
OG0004488	CKAMA.g8920	CBRIG.CBG12637	CELEG.K06A5.1	CTROP.Csp11.Scaffold630.g20336
OG0004489	CKAMA.g8921	CBRIG.CBG12636	CELEG.K06A5.7	CTROP.Csp11.Scaffold630.g20337
OG0004490	CKAMA.g8924	CBRIG.CBG30979	CELEG.T10E9.6	CTROP.Csp11.Scaffold583.g4724
OG0004491	CKAMA.g8926	CBRIG.CBG12669	CELEG.T10E9.3	CTROP.Csp11.Scaffold583.g4721
OG0004492	CKAMA.g8927	CBRIG.CBG12667	CELEG.T10E9.2	CTROP.Csp11.Scaffold583.g4719
OG0004493	CKAMA.g8933	CBRIG.CBG12662	CELEG.F57B10.8	CTROP.Csp11.Scaffold583.g4715
OG0004494	CKAMA.g8934	CBRIG.CBG12650	CELEG.K07F5.4	CTROP.Csp11.Scaffold583.g4706
OG0004495	CKAMA.g8936	CBRIG.CBG12684	CELEG.D2092.7	CTROP.Csp11.Scaffold629.g14672
OG0004496	CKAMA.g8937	CBRIG.CBG12686	CELEG.D2092.3	CTROP.Csp11.Scaffold629.g14675
OG0004497	CKAMA.g8938	CBRIG.CBG12687	CELEG.D2092.2	CTROP.Csp11.Scaffold629.g14676
OG0004498	CKAMA.g16249	CBRIG.CBG14947	CELEG.Y47G6A.10	CTROP.Csp11.Scaffold627.g6780
OG0004499	CKAMA.g16259	CBRIG.CBG02411	CELEG.F12A10.4	CTROP.Csp11.Scaffold629.g11394
OG0004500	CKAMA.g8941	CBRIG.CBG23034	CELEG.Y75B8A.3	CTROP.Csp11.Scaffold629.g14517
OG0004501	CKAMA.g8943	CBRIG.CBG07074	CELEG.H17B01.4	CTROP.Csp11.Scaffold605.g5655
OG0004502	CKAMA.g8944	CBRIG.CBG07083	CELEG.C03H5.6	CTROP.Csp11.Scaffold605.g5644
OG0004503	CKAMA.g16263	CBRIG.CBG23049	CELEG.Y75B8A.17	CTROP.Csp11.Scaffold629.g14544
OG0004504	CKAMA.g8947	CBRIG.CBG12254	CELEG.ZK652.9	CTROP.Csp11.Scaffold630.g17224
OG0004505	CKAMA.g8950	CBRIG.CBG12273	CELEG.C02C2.3	CTROP.Csp11.Scaffold615.g5984
OG0004506	CKAMA.g8951	CBRIG.CBG12271	CELEG.C02C2.1	CTROP.Csp11.Scaffold615.g5982
OG0004507	CKAMA.g8952	CBRIG.CBG12270	CELEG.C02C2.5	CTROP.Csp11.Scaffold615.g5983
OG0004509	CKAMA.g16275	CBRIG.CBG02946	CELEG.T06D8.2	CTROP.Csp11.Scaffold45.g275
OG0004510	CKAMA.g8967	CBRIG.CBG09171	CELEG.C07H6.6	CTROP.Csp11.Scaffold629.g9871
OG0004511	CKAMA.g8976	CBRIG.CBG18348	CELEG.Y39A1A.7	CTROP.Csp11.Scaffold628.g7326
OG0004512	CKAMA.g8977	CBRIG.CBG18347	CELEG.Y39A1A.23	CTROP.Csp11.Scaffold628.g7327
OG0004513	CKAMA.g8978	CBRIG.CBG18346	CELEG.Y39A1A.8	CTROP.Csp11.Scaffold628.g7328
OG0004514	CKAMA.g8979	CBRIG.CBG18333	CELEG.Y39A1A.9	CTROP.Csp11.Scaffold628.g7329
OG0004515	CKAMA.g8980	CBRIG.CBG18334	CELEG.Y39A1A.11	CTROP.Csp11.Scaffold628.g7330
OG0004516	CKAMA.g8981	CBRIG.CBG18338	CELEG.Y39A1A.14	CTROP.Csp11.Scaffold628.g7333
OG0004517	CKAMA.g8982	CBRIG.CBG18339	CELEG.Y39A1A.15	CTROP.Csp11.Scaffold628.g7322
OG0004518	CKAMA.g8986	CBRIG.CBG18328	CELEG.Y39A1A.20	CTROP.Csp11.Scaffold628.g7316
OG0004519	CKAMA.g8991	CBRIG.CBG18322	CELEG.W09D10.2	CTROP.Csp11.Scaffold628.g7311
OG0004520	CKAMA.g8992	CBRIG.CBG18321	CELEG.W09D10.1	CTROP.Csp11.Scaffold628.g7310
OG0004521	CKAMA.g8993	CBRIG.CBG18320	CELEG.K01G5.8	CTROP.Csp11.Scaffold628.g7309
OG0004522	CKAMA.g8995	CBRIG.CBG18318	CELEG.K01G5.6	CTROP.Csp11.Scaffold628.g7306
OG0004523	CKAMA.g8996	CBRIG.CBG18317	CELEG.K01G5.4	CTROP.Csp11.Scaffold628.g7305
OG0004524	CKAMA.g8997	CBRIG.CBG18316	CELEG.K01G5.5	CTROP.Csp11.Scaffold628.g7304
OG0004525	CKAMA.g9000	CBRIG.CBG18312	CELEG.K01G5.9	CTROP.Csp11.Scaffold628.g7300
OG0004526	CKAMA.g9001	CBRIG.CBG25999	CELEG.Y39A1B.3	CTROP.Csp11.Scaffold628.g7299
OG0004527	CKAMA.g9002	CBRIG.CBG18310	CELEG.Y39A1B.2	CTROP.Csp11.Scaffold628.g7297
OG0004528	CKAMA.g9003	CBRIG.CBG18309	CELEG.ZK418.2	CTROP.Csp11.Scaffold628.g7296
OG0004529	CKAMA.g9005	CBRIG.CBG18307	CELEG.K11D9.1	CTROP.Csp11.Scaffold628.g7293
OG0004530	CKAMA.g9006	CBRIG.CBG18305	CELEG.K11D9.2	CTROP.Csp11.Scaffold628.g7291
OG0004531	CKAMA.g9007	CBRIG.CBG18302	CELEG.R17.3	CTROP.Csp11.Scaffold628.g7286
OG0004532	CKAMA.g9008	CBRIG.CBG18301	CELEG.R17.2	CTROP.Csp11.Scaffold628.g7285
OG0004533	CKAMA.g9009	CBRIG.CBG18300	CELEG.Y39A1C.4	CTROP.Csp11.Scaffold628.g7284
OG0004534	CKAMA.g9010	CBRIG.CBG18299	CELEG.Y39A1C.2	CTROP.Csp11.Scaffold628.g7282
OG0004535	CKAMA.g9011	CBRIG.CBG18298	CELEG.Y39A1C.3	CTROP.Csp11.Scaffold628.g7281
OG0004536	CKAMA.g9012	CBRIG.CBG18297	CELEG.C44B9.1	CTROP.Csp11.Scaffold628.g7280
OG0004537	CKAMA.g9016	CBRIG.CBG18277	CELEG.M142.2	CTROP.Csp11.Scaffold628.g7270
OG0004538	CKAMA.g9018	CBRIG.CBG18274	CELEG.M142.8	CTROP.Csp11.Scaffold628.g7268
OG0004539	CKAMA.g9019	CBRIG.CBG18273	CELEG.M142.6	CTROP.Csp11.Scaffold628.g7267
OG0004540	CKAMA.g9020	CBRIG.CBG18271	CELEG.Y48A6A.1	CTROP.Csp11.Scaffold628.g7265
OG0004541	CKAMA.g9021	CBRIG.CBG18270	CELEG.W05B2.2	CTROP.Csp11.Scaffold628.g7261
OG0004542	CKAMA.g9022	CBRIG.CBG18280	CELEG.ZK520.2	CTROP.Csp11.Scaffold628.g7259
OG0004543	CKAMA.g9024	CBRIG.CBG18282	CELEG.ZK520.4	CTROP.Csp11.Scaffold628.g7257
OG0004544	CKAMA.g16294	CBRIG.CBG20522	CELEG.Y39B6A.7	CTROP.Csp11.Scaffold630.g17620
OG0004545	CKAMA.g16298	CBRIG.CBG21464	CELEG.C33C12.9	CTROP.Csp11.Scaffold517.g2730
OG0004546	CKAMA.g16301	CBRIG.CBG04112	CELEG.Y71F9B.5	CTROP.Csp11.Scaffold627.g6854
OG0004548	CKAMA.g9027	CBRIG.CBG15813	CELEG.ZK1151.1	CTROP.Csp11.Scaffold623.g6304
OG0004549	CKAMA.g9028	CBRIG.CBG02446	CELEG.T25E4.2	CTROP.Csp11.Scaffold629.g11370
OG0004550	CKAMA.g9029	CBRIG.CBG02447	CELEG.R09E10.1	CTROP.Csp11.Scaffold629.g11369
OG0004552	CKAMA.g16310	CBRIG.CBG07432	CELEG.F18H3.1	CTROP.Csp11.Scaffold630.g22073
OG0004553	CKAMA.g9038	CBRIG.CBG13266	CELEG.Y66D12A.13	CTROP.Csp11.Scaffold488.g2017
OG0004554	CKAMA.g16316	CBRIG.CBG03579	CELEG.F56A8.1	CTROP.Csp11.Scaffold629.g14734
OG0004555	CKAMA.g9041	CBRIG.CBG06095	CELEG.ZK792.4	CTROP.Csp11.Scaffold629.g13315
OG0004556	CKAMA.g9042	CBRIG.CBG26313	CELEG.ZK792.5	CTROP.Csp11.Scaffold629.g13321
OG0004557	CKAMA.g9043	CBRIG.CBG06092	CELEG.ZK792.6	CTROP.Csp11.Scaffold629.g13322
OG0004558	CKAMA.g9044	CBRIG.CBG06090	CELEG.ZK792.7	CTROP.Csp11.Scaffold629.g13323
OG0004559	CKAMA.g9045	CBRIG.CBG06089	CELEG.T22B3.1	CTROP.Csp11.Scaffold629.g13324
OG0004560	CKAMA.g9047	CBRIG.CBG06086	CELEG.K01A6.2	CTROP.Csp11.Scaffold629.g8091
OG0004561	CKAMA.g9052	CBRIG.CBG06079	CELEG.H02I12.3	CTROP.Csp11.Scaffold629.g8089
OG0004562	CKAMA.g9053	CBRIG.CBG19302	CELEG.C50F4.11	CTROP.Csp11.Scaffold629.g15727
OG0004563	CKAMA.g9055	CBRIG.CBG06076	CELEG.T01G1.1	CTROP.Csp11.Scaffold629.g8079
OG0004564	CKAMA.g9059	CBRIG.CBG06075	CELEG.B0035.12	CTROP.Csp11.Scaffold629.g8078
OG0004565	CKAMA.g9061	CBRIG.CBG06153	CELEG.C10C6.2	CTROP.Csp11.Scaffold507.g2460
OG0004566	CKAMA.g9062	CBRIG.CBG06155	CELEG.C10C6.1	CTROP.Csp11.Scaffold507.g2453
OG0004567	CKAMA.g9063	CBRIG.CBG06201	CELEG.ZK829.7	CTROP.Csp11.Scaffold629.g15588
OG0004568	CKAMA.g9064	CBRIG.CBG06200	CELEG.ZK829.6	CTROP.Csp11.Scaffold629.g15589
OG0004569	CKAMA.g9066	CBRIG.CBG06199	CELEG.ZK829.4	CTROP.Csp11.Scaffold629.g15590
OG0004570	CKAMA.g9067	CBRIG.CBG06198	CELEG.ZK829.2	CTROP.Csp11.Scaffold629.g15593
OG0004571	CKAMA.g9068	CBRIG.CBG06197	CELEG.ZK829.3	CTROP.Csp11.Scaffold629.g15594
OG0004572	CKAMA.g9069	CBRIG.CBG06196	CELEG.ZK829.1	CTROP.Csp11.Scaffold629.g15595
OG0004573	CKAMA.g9070	CBRIG.CBG06195	CELEG.ZK822.5	CTROP.Csp11.Scaffold629.g15596
OG0004574	CKAMA.g9073	CBRIG.CBG06192	CELEG.ZK822.2	CTROP.Csp11.Scaffold629.g15600
OG0004575	CKAMA.g9074	CBRIG.CBG06191	CELEG.ZK822.1	CTROP.Csp11.Scaffold629.g15599
OG0004576	CKAMA.g9075	CBRIG.CBG04322	CELEG.C56C10.4	CTROP.Csp11.Scaffold629.g12033
OG0004577	CKAMA.g9079	CBRIG.CBG02692	CELEG.F18C5.9	CTROP.Csp11.Scaffold629.g12028
OG0004578	CKAMA.g9082	CBRIG.CBG31355	CELEG.F18C5.10	CTROP.Csp11.Scaffold629.g12025
OG0004579	CKAMA.g9083	CBRIG.CBG02689	CELEG.F18C5.2	CTROP.Csp11.Scaffold629.g12024
OG0004580	CKAMA.g9087	CBRIG.CBG16533	CELEG.F55G1.4	CTROP.Csp11.Scaffold629.g8973
OG0004581	CKAMA.g9090	CBRIG.CBG02684	CELEG.C56E6.4	CTROP.Csp11.Scaffold629.g11556
OG0004582	CKAMA.g9091	CBRIG.CBG02683	CELEG.C56E6.2	CTROP.Csp11.Scaffold629.g11555
OG0004583	CKAMA.g9092	CBRIG.CBG02682	CELEG.C56E6.3	CTROP.Csp11.Scaffold629.g11554
OG0004584	CKAMA.g9093	CBRIG.CBG02680	CELEG.R05G9R.1	CTROP.Csp11.Scaffold629.g11553
OG0004585	CKAMA.g9095	CBRIG.CBG02674	CELEG.R05G9.2	CTROP.Csp11.Scaffold629.g11559
OG0004586	CKAMA.g9096	CBRIG.CBG02672	CELEG.T28D9.2	CTROP.Csp11.Scaffold629.g11561
OG0004587	CKAMA.g9097	CBRIG.CBG02671	CELEG.T28D9.10	CTROP.Csp11.Scaffold629.g11562
OG0004588	CKAMA.g9100	CBRIG.CBG02656	CELEG.T28D9.7	CTROP.Csp11.Scaffold629.g11565
OG0004589	CKAMA.g9104	CBRIG.CBG02659	CELEG.K06A1.6	CTROP.Csp11.Scaffold629.g11568
OG0004590	CKAMA.g9105	CBRIG.CBG02662	CELEG.K06A1.1	CTROP.Csp11.Scaffold629.g11569
OG0004591	CKAMA.g9108	CBRIG.CBG02663	CELEG.K06A1.5	CTROP.Csp11.Scaffold629.g11570
OG0004592	CKAMA.g9109	CBRIG.CBG02664	CELEG.K06A1.4	CTROP.Csp11.Scaffold629.g11571
OG0004593	CKAMA.g9110	CBRIG.CBG02666	CELEG.K06A1.3	CTROP.Csp11.Scaffold629.g11574
OG0004594	CKAMA.g9111	CBRIG.CBG02667	CELEG.K03H9.2	CTROP.Csp11.Scaffold629.g11575
OG0004595	CKAMA.g9112	CBRIG.CBG02651	CELEG.T25D10.4	CTROP.Csp11.Scaffold629.g11594
OG0004596	CKAMA.g9113	CBRIG.CBG02650	CELEG.T25D10.3	CTROP.Csp11.Scaffold629.g11593
OG0004597	CKAMA.g9114	CBRIG.CBG02648	CELEG.T25D10.1	CTROP.Csp11.Scaffold629.g11592
OG0004598	CKAMA.g9116	CBRIG.CBG02647	CELEG.T25D10.2	CTROP.Csp11.Scaffold629.g11591
OG0004599	CKAMA.g16323	CBRIG.CBG15336	CELEG.F44E2.11	CTROP.Csp11.Scaffold629.g9833
OG0004600	CKAMA.g16331	CBRIG.CBG02882	CELEG.W02B12.11	CTROP.Csp11.Scaffold554.g3706
OG0004601	CKAMA.g16334	CBRIG.CBG23043	CELEG.Y75B8A.12	CTROP.Csp11.Scaffold629.g14540
OG0004602	CKAMA.g16335	CBRIG.CBG19963	CELEG.Y4C6B.7	CTROP.Csp11.Scaffold494.g2173
OG0004603	CKAMA.g16337	CBRIG.CBG13913	CELEG.Y94H6A.8	CTROP.Csp11.Scaffold630.g18965
OG0004605	CKAMA.g16347	CBRIG.CBG13210	CELEG.Y47D3A.21	CTROP.Csp11.Scaffold406.g908
OG0004606	CKAMA.g9130	CBRIG.CBG16260	CELEG.H19J13.1	CTROP.Csp11.Scaffold629.g13248
OG0004607	CKAMA.g9131	CBRIG.CBG27427	CELEG.T20F7.7	CTROP.Csp11.Scaffold629.g13251
OG0004608	CKAMA.g9133	CBRIG.CBG16259	CELEG.T20F7.6	CTROP.Csp11.Scaffold629.g13253
OG0004610	CKAMA.g9139	CBRIG.CBG16256	CELEG.F41G4.8	CTROP.Csp11.Scaffold629.g13262
OG0004611	CKAMA.g9142	CBRIG.CBG16251	CELEG.F41G4.2	CTROP.Csp11.Scaffold629.g13263
OG0004612	CKAMA.g9143	CBRIG.CBG16250	CELEG.T01C8.7	CTROP.Csp11.Scaffold629.g13266
OG0004613	CKAMA.g9144	CBRIG.CBG16249	CELEG.T01C8.1	CTROP.Csp11.Scaffold629.g13267
OG0004614	CKAMA.g9146	CBRIG.CBG16246	CELEG.T01C8.2	CTROP.Csp11.Scaffold629.g13270
OG0004615	CKAMA.g9147	CBRIG.CBG16245	CELEG.T01C8.3	CTROP.Csp11.Scaffold629.g13271
OG0004616	CKAMA.g9154	CBRIG.CBG16326	CELEG.C10E2.5	CTROP.Csp11.Scaffold629.g13280
OG0004617	CKAMA.g9155	CBRIG.CBG16328	CELEG.C10E2.3	CTROP.Csp11.Scaffold629.g13283
OG0004618	CKAMA.g9156	CBRIG.CBG16329	CELEG.T21F2.1	CTROP.Csp11.Scaffold629.g13286
OG0004619	CKAMA.g9165	CBRIG.CBG01874	CELEG.F31A3.5	CTROP.Csp11.Scaffold629.g13588
OG0004620	CKAMA.g9166	CBRIG.CBG01876	CELEG.F39B3.2	CTROP.Csp11.Scaffold629.g13589
OG0004621	CKAMA.g9167	CBRIG.CBG01879	CELEG.C16H3.2	CTROP.Csp11.Scaffold629.g13590
OG0004622	CKAMA.g9168	CBRIG.CBG01880	CELEG.C16H3.3	CTROP.Csp11.Scaffold629.g13591
OG0004623	CKAMA.g9169	CBRIG.CBG01881	CELEG.C16H3.1	CTROP.Csp11.Scaffold629.g13592
OG0004624	CKAMA.g9170	CBRIG.CBG01882	CELEG.H18N23.2	CTROP.Csp11.Scaffold629.g13593
OG0004625	CKAMA.g9171	CBRIG.CBG01885	CELEG.T23E7.4	CTROP.Csp11.Scaffold629.g13596
OG0004626	CKAMA.g9172	CBRIG.CBG01887	CELEG.T23E7.2	CTROP.Csp11.Scaffold629.g13597
OG0004627	CKAMA.g9173	CBRIG.CBG01889	CELEG.T23E7.6	CTROP.Csp11.Scaffold629.g13598
OG0004628	CKAMA.g9176	CBRIG.CBG01895	CELEG.F36G3.1	CTROP.Csp11.Scaffold629.g13602
OG0004629	CKAMA.g9177	CBRIG.CBG01898	CELEG.F47A4.1	CTROP.Csp11.Scaffold629.g13604
OG0004630	CKAMA.g9178	CBRIG.CBG01899	CELEG.F36G3.3	CTROP.Csp11.Scaffold629.g13605
OG0004631	CKAMA.g9180	CBRIG.CBG01901	CELEG.F47A4.3	CTROP.Csp11.Scaffold629.g13608
OG0004632	CKAMA.g9181	CBRIG.CBG01902	CELEG.F47A4.5	CTROP.Csp11.Scaffold629.g13609
OG0004633	CKAMA.g9182	CBRIG.CBG01903	CELEG.R07B1.1	CTROP.Csp11.Scaffold629.g13610
OG0004634	CKAMA.g9186	CBRIG.CBG01906	CELEG.R07B1.11	CTROP.Csp11.Scaffold629.g13613
OG0004635	CKAMA.g9187	CBRIG.CBG01907	CELEG.R07B1.3	CTROP.Csp11.Scaffold629.g13614
OG0004636	CKAMA.g9188	CBRIG.CBG01908	CELEG.R07B1.4	CTROP.Csp11.Scaffold629.g13615
OG0004637	CKAMA.g9190	CBRIG.CBG01911	CELEG.R07B1.8	CTROP.Csp11.Scaffold629.g13622
OG0004638	CKAMA.g9192	CBRIG.CBG01917	CELEG.F21G4.1	CTROP.Csp11.Scaffold629.g13627
OG0004639	CKAMA.g9193	CBRIG.CBG01918	CELEG.F21G4.3	CTROP.Csp11.Scaffold629.g13628
OG0004641	CKAMA.g9196	CBRIG.CBG01923	CELEG.F21G4.6	CTROP.Csp11.Scaffold629.g13632
OG0004642	CKAMA.g9199	CBRIG.CBG01935	CELEG.C17G1.2	CTROP.Csp11.Scaffold629.g13636
OG0004643	CKAMA.g9202	CBRIG.CBG01957	CELEG.C17G1.4	CTROP.Csp11.Scaffold629.g13639
OG0004644	CKAMA.g9204	CBRIG.CBG01954	CELEG.C17G1.6	CTROP.Csp11.Scaffold629.g13642
OG0004645	CKAMA.g9205	CBRIG.CBG01953	CELEG.C17G1.7	CTROP.Csp11.Scaffold629.g13643
OG0004646	CKAMA.g9207	CBRIG.CBG01950	CELEG.ZC506.3	CTROP.Csp11.Scaffold629.g13644
OG0004648	CKAMA.g9209	CBRIG.CBG01949	CELEG.ZC506.4	CTROP.Csp11.Scaffold629.g13645
OG0004649	CKAMA.g9210	CBRIG.CBG01948	CELEG.F19C6.5	CTROP.Csp11.Scaffold629.g13646
OG0004650	CKAMA.g9211	CBRIG.CBG01947	CELEG.F19C6.1	CTROP.Csp11.Scaffold629.g13647
OG0004651	CKAMA.g9212	CBRIG.CBG01946	CELEG.F19C6.2	CTROP.Csp11.Scaffold629.g13648
OG0004652	CKAMA.g9213	CBRIG.CBG01945	CELEG.F19C6.3	CTROP.Csp11.Scaffold629.g13649
OG0004653	CKAMA.g9215	CBRIG.CBG01939	CELEG.ZC374.2	CTROP.Csp11.Scaffold629.g13653
OG0004654	CKAMA.g9217	CBRIG.CBG01966	CELEG.ZC373.2	CTROP.Csp11.Scaffold629.g13657
OG0004655	CKAMA.g9218	CBRIG.CBG01967	CELEG.ZC373.4	CTROP.Csp11.Scaffold629.g13658
OG0004656	CKAMA.g9219	CBRIG.CBG01970	CELEG.ZC373.5	CTROP.Csp11.Scaffold629.g13659
OG0004657	CKAMA.g9220	CBRIG.CBG01971	CELEG.ZC373.6	CTROP.Csp11.Scaffold629.g13660
OG0004658	CKAMA.g9223	CBRIG.CBG01976	CELEG.W07E11.4	CTROP.Csp11.Scaffold629.g13663
OG0004659	CKAMA.g9226	CBRIG.CBG01980	CELEG.T06H11.1	CTROP.Csp11.Scaffold629.g13666
OG0004660	CKAMA.g9228	CBRIG.CBG01997	CELEG.T06H11.4	CTROP.Csp11.Scaffold629.g13672
OG0004661	CKAMA.g9233	CBRIG.CBG17160	CELEG.F09B9.2	CTROP.Csp11.Scaffold629.g13685
OG0004662	CKAMA.g9234	CBRIG.CBG17161	CELEG.F09B9.5	CTROP.Csp11.Scaffold629.g13686
OG0004663	CKAMA.g9235	CBRIG.CBG17162	CELEG.F09B9.3	CTROP.Csp11.Scaffold629.g13687
OG0004664	CKAMA.g9236	CBRIG.CBG17163	CELEG.F09B9.4	CTROP.Csp11.Scaffold629.g13688
OG0004665	CKAMA.g9237	CBRIG.CBG17168	CELEG.C07A4.1	CTROP.Csp11.Scaffold629.g13689
OG0004666	CKAMA.g9238	CBRIG.CBG17169	CELEG.C07A4.2	CTROP.Csp11.Scaffold629.g13690
OG0004667	CKAMA.g9240	CBRIG.CBG17172	CELEG.F21A10.1	CTROP.Csp11.Scaffold629.g13692
OG0004668	CKAMA.g9244	CBRIG.CBG17177	CELEG.F44A6.1	CTROP.Csp11.Scaffold629.g13694
OG0004669	CKAMA.g9248	CBRIG.CBG17187	CELEG.F44A6.5	CTROP.Csp11.Scaffold629.g13699
OG0004670	CKAMA.g9249	CBRIG.CBG17192	CELEG.C14H10.3	CTROP.Csp11.Scaffold629.g13702
OG0004671	CKAMA.g9250	CBRIG.CBG17194	CELEG.C14H10.1	CTROP.Csp11.Scaffold629.g13703
OG0004672	CKAMA.g9251	CBRIG.CBG17195	CELEG.C14H10.2	CTROP.Csp11.Scaffold629.g13704
OG0004673	CKAMA.g9252	CBRIG.CBG17198	CELEG.F41E7.2	CTROP.Csp11.Scaffold629.g13706
OG0004674	CKAMA.g9253	CBRIG.CBG17200	CELEG.F41E7.3	CTROP.Csp11.Scaffold629.g13708
OG0004676	CKAMA.g9256	CBRIG.CBG17204	CELEG.F41E7.8	CTROP.Csp11.Scaffold629.g13711
OG0004677	CKAMA.g9258	CBRIG.CBG17207	CELEG.F41E7.9	CTROP.Csp11.Scaffold629.g13714
OG0004678	CKAMA.g9259	CBRIG.CBG17208	CELEG.R07E3.6	CTROP.Csp11.Scaffold629.g13715
OG0004679	CKAMA.g9261	CBRIG.CBG17209	CELEG.R07E3.5	CTROP.Csp11.Scaffold629.g13716
OG0004680	CKAMA.g9262	CBRIG.CBG17212	CELEG.R07E3.2	CTROP.Csp11.Scaffold629.g13719
OG0004681	CKAMA.g9267	CBRIG.CBG17217	CELEG.R07E3.1	CTROP.Csp11.Scaffold629.g13727
OG0004682	CKAMA.g9268	CBRIG.CBG17218	CELEG.R07E3.7	CTROP.Csp11.Scaffold629.g13729
OG0004683	CKAMA.g9269	CBRIG.CBG17221	CELEG.Y49A10A.1	CTROP.Csp11.Scaffold629.g13732
OG0004684	CKAMA.g9270	CBRIG.CBG17226	CELEG.F46F6.1	CTROP.Csp11.Scaffold629.g13734
OG0004685	CKAMA.g9273	CBRIG.CBG17231	CELEG.ZC504.5	CTROP.Csp11.Scaffold629.g13739
OG0004686	CKAMA.g9274	CBRIG.CBG17234	CELEG.ZC504.2	CTROP.Csp11.Scaffold629.g13743
OG0004687	CKAMA.g9276	CBRIG.CBG17239	CELEG.ZC504.4	CTROP.Csp11.Scaffold629.g13745
OG0004688	CKAMA.g9294	CBRIG.CBG07175	CELEG.C13A10.2	CTROP.Csp11.Scaffold629.g9012
OG0004689	CKAMA.g9295	CBRIG.CBG07111	CELEG.Y57G7A.10	CTROP.Csp11.Scaffold605.g5683
OG0004690	CKAMA.g9297	CBRIG.CBG07108	CELEG.F56D12.6	CTROP.Csp11.Scaffold605.g5681
OG0004691	CKAMA.g9298	CBRIG.CBG07107	CELEG.F56D12.5	CTROP.Csp11.Scaffold605.g5680
OG0004692	CKAMA.g9300	CBRIG.CBG07106	CELEG.F56D12.4	CTROP.Csp11.Scaffold605.g5679
OG0004693	CKAMA.g9301	CBRIG.CBG07112	CELEG.Y57G7A.9	CTROP.Csp11.Scaffold605.g5684
OG0004694	CKAMA.g16369	CBRIG.CBG19875	CELEG.H35B03.1	CTROP.Csp11.Scaffold510.g2539
OG0004695	CKAMA.g1519	CBRIG.CBG01082	CELEG.C39F7.2	CTROP.Csp11.Scaffold513.g2595
OG0004696	CKAMA.g1520	CBRIG.CBG30852	CELEG.Y50D4A.2	CTROP.Csp11.Scaffold513.g2593
OG0004697	CKAMA.g1521	CBRIG.CBG01087	CELEG.Y50D4A.4	CTROP.Csp11.Scaffold513.g2592
OG0004698	CKAMA.g1523	CBRIG.CBG01095	CELEG.T21H3.1	CTROP.Csp11.Scaffold513.g2590
OG0004699	CKAMA.g1525	CBRIG.CBG01094	CELEG.T21H3.2	CTROP.Csp11.Scaffold513.g2589
OG0004700	CKAMA.g1526	CBRIG.CBG01096	CELEG.T21H3.5	CTROP.Csp11.Scaffold629.g12371
OG0004701	CKAMA.g1527	CBRIG.CBG01097	CELEG.T21H3.3	CTROP.Csp11.Scaffold513.g2585
OG0004702	CKAMA.g1531	CBRIG.CBG01105	CELEG.Y50D4B.1	CTROP.Csp11.Scaffold629.g12369
OG0004704	CKAMA.g9308	CBRIG.CBG23928	CELEG.ZK973.11	CTROP.Csp11.Scaffold456.g1358
OG0004705	CKAMA.g9310	CBRIG.CBG09229	CELEG.T24A11.3	CTROP.Csp11.Scaffold552.g3652
OG0004708	CKAMA.g16384	CBRIG.CBG08398	CELEG.Y41D4A.1	CTROP.Csp11.Scaffold629.g10579
OG0004709	CKAMA.g16392	CBRIG.CBG12007	CELEG.C32E8.9	CTROP.Csp11.Scaffold627.g6741
OG0004710	CKAMA.g9319	CBRIG.CBG19177	CELEG.C25E10.12	CTROP.Csp11.Scaffold630.g16834
OG0004711	CKAMA.g9320	CBRIG.CBG19179	CELEG.T27E4.4	CTROP.Csp11.Scaffold630.g16833
OG0004712	CKAMA.g9322	CBRIG.CBG27179	CELEG.T27E4.6	CTROP.Csp11.Scaffold630.g16836
OG0004713	CKAMA.g9325	CBRIG.CBG19188	CELEG.T27E4.1	CTROP.Csp11.Scaffold630.g16843
OG0004714	CKAMA.g9328	CBRIG.CBG19196	CELEG.F21C10.7	CTROP.Csp11.Scaffold630.g16857
OG0004715	CKAMA.g9329	CBRIG.CBG31313	CELEG.F21C10.11	CTROP.Csp11.Scaffold630.g16855
OG0004716	CKAMA.g9330	CBRIG.CBG19197	CELEG.F21C10.6	CTROP.Csp11.Scaffold630.g16854
OG0004717	CKAMA.g9333	CBRIG.CBG19064	CELEG.F20A1.9	CTROP.Csp11.Scaffold556.g3780
OG0004718	CKAMA.g9336	CBRIG.CBG19069	CELEG.Y57E12AL.2	CTROP.Csp11.Scaffold629.g8929
OG0004719	CKAMA.g9338	CBRIG.CBG19071	CELEG.Y57E12AL.6	CTROP.Csp11.Scaffold629.g8927
OG0004720	CKAMA.g9340	CBRIG.CBG19074	CELEG.Y57E12AR.1	CTROP.Csp11.Scaffold629.g8924
OG0004721	CKAMA.g9343	CBRIG.CBG19078	CELEG.VC5.2	CTROP.Csp11.Scaffold629.g15442
OG0004722	CKAMA.g9345	CBRIG.CBG23495	CELEG.C54D10.9	CTROP.Csp11.Scaffold417.g1118
OG0004723	CKAMA.g9346	CBRIG.CBG23496	CELEG.C54D10.10	CTROP.Csp11.Scaffold417.g1117
OG0004724	CKAMA.g9347	CBRIG.CBG23497	CELEG.F28C1.1	CTROP.Csp11.Scaffold417.g1116
OG0004725	CKAMA.g9348	CBRIG.CBG23499	CELEG.F28C1.2	CTROP.Csp11.Scaffold417.g1115
OG0004726	CKAMA.g9349	CBRIG.CBG23501	CELEG.F28C1.3	CTROP.Csp11.Scaffold496.g2211
OG0004727	CKAMA.g9350	CBRIG.CBG23504	CELEG.W04D2.1	CTROP.Csp11.Scaffold496.g2210
OG0004728	CKAMA.g9353	CBRIG.CBG23509	CELEG.W04D2.4	CTROP.Csp11.Scaffold33.g147
OG0004729	CKAMA.g9354	CBRIG.CBG23510	CELEG.W04D2.6	CTROP.Csp11.Scaffold33.g148
OG0004730	CKAMA.g9355	CBRIG.CBG23511	CELEG.T28H10.1	CTROP.Csp11.Scaffold33.g149
OG0004731	CKAMA.g9356	CBRIG.CBG23512	CELEG.T28H10.4	CTROP.Csp11.Scaffold33.g150
OG0004732	CKAMA.g9357	CBRIG.CBG23515	CELEG.T28H10.2	CTROP.Csp11.Scaffold33.g151
OG0004733	CKAMA.g9358	CBRIG.CBG23516	CELEG.T28H10.3	CTROP.Csp11.Scaffold33.g152
OG0004734	CKAMA.g9359	CBRIG.CBG23517	CELEG.C13C12.1	CTROP.Csp11.Scaffold33.g141
OG0004735	CKAMA.g9360	CBRIG.CBG23519	CELEG.C13C12.2	CTROP.Csp11.Scaffold33.g139
OG0004736	CKAMA.g9361	CBRIG.CBG23522	CELEG.F45D3.2	CTROP.Csp11.Scaffold33.g137
OG0004737	CKAMA.g9362	CBRIG.CBG23524	CELEG.F45D3.3	CTROP.Csp11.Scaffold630.g19736
OG0004738	CKAMA.g9363	CBRIG.CBG23525	CELEG.F45D3.4	CTROP.Csp11.Scaffold630.g19742
OG0004739	CKAMA.g9364	CBRIG.CBG23528	CELEG.E02A10.1	CTROP.Csp11.Scaffold630.g19740
OG0004740	CKAMA.g9365	CBRIG.CBG23529	CELEG.E02A10.4	CTROP.Csp11.Scaffold630.g19739
OG0004741	CKAMA.g9366	CBRIG.CBG23530	CELEG.E02A10.2	CTROP.Csp11.Scaffold630.g19738
OG0004742	CKAMA.g9368	CBRIG.CBG23537	CELEG.C14C10.2	CTROP.Csp11.Scaffold630.g19746
OG0004743	CKAMA.g9369	CBRIG.CBG23538	CELEG.C14C10.4	CTROP.Csp11.Scaffold630.g19747
OG0004744	CKAMA.g9370	CBRIG.CBG23539	CELEG.C14C10.3	CTROP.Csp11.Scaffold630.g19748
OG0004745	CKAMA.g9371	CBRIG.CBG08524	CELEG.C14C10.5	CTROP.Csp11.Scaffold630.g19749
OG0004746	CKAMA.g9372	CBRIG.CBG08525	CELEG.C14C10.6	CTROP.Csp11.Scaffold630.g19750
OG0004747	CKAMA.g9375	CBRIG.CBG08530	CELEG.ZC116.3	CTROP.Csp11.Scaffold630.g19754
OG0004748	CKAMA.g9378	CBRIG.CBG08544	CELEG.F56H9.3	CTROP.Csp11.Scaffold630.g19767
OG0004749	CKAMA.g9379	CBRIG.CBG08546	CELEG.F56H9.5	CTROP.Csp11.Scaffold476.g1724
OG0004750	CKAMA.g9381	CBRIG.CBG08548	CELEG.W05B10.2	CTROP.Csp11.Scaffold476.g1723
OG0004751	CKAMA.g9382	CBRIG.CBG08550	CELEG.W05B10.4	CTROP.Csp11.Scaffold476.g1721
OG0004752	CKAMA.g9383	CBRIG.CBG23209	CELEG.T11F9.4	CTROP.Csp11.Scaffold629.g7490
OG0004753	CKAMA.g9384	CBRIG.CBG23208	CELEG.T11F9.2	CTROP.Csp11.Scaffold629.g7489
OG0004754	CKAMA.g9385	CBRIG.CBG23205	CELEG.F57B7.3	CTROP.Csp11.Scaffold629.g12677
OG0004755	CKAMA.g9386	CBRIG.CBG23204	CELEG.F57B7.4	CTROP.Csp11.Scaffold629.g12676
OG0004756	CKAMA.g9388	CBRIG.CBG23201	CELEG.F57B7.1	CTROP.Csp11.Scaffold629.g12652
OG0004757	CKAMA.g9390	CBRIG.CBG23191	CELEG.K03B8.6	CTROP.Csp11.Scaffold629.g12666
OG0004759	CKAMA.g9394	CBRIG.CBG23188	CELEG.K03B8.11	CTROP.Csp11.Scaffold629.g12647
OG0004760	CKAMA.g9396	CBRIG.CBG23184	CELEG.F55C10.5	CTROP.Csp11.Scaffold629.g12643
OG0004761	CKAMA.g9397	CBRIG.CBG23183	CELEG.F55C10.1	CTROP.Csp11.Scaffold629.g12662
OG0004762	CKAMA.g9398	CBRIG.CBG23180	CELEG.T02E9.3	CTROP.Csp11.Scaffold629.g12624
OG0004763	CKAMA.g9400	CBRIG.CBG14963	CELEG.W05F2.7	CTROP.Csp11.Scaffold627.g6817
OG0004764	CKAMA.g9401	CBRIG.CBG14962	CELEG.W05F2.3	CTROP.Csp11.Scaffold627.g6818
OG0004765	CKAMA.g16404	CBRIG.CBG14952	CELEG.K03E5.3	CTROP.Csp11.Scaffold627.g6802
OG0004766	CKAMA.g1564	CBRIG.CBG05589	CELEG.B0250.9	CTROP.Csp11.Scaffold630.g21890
OG0004767	CKAMA.g1565	CBRIG.CBG05588	CELEG.B0250.1	CTROP.Csp11.Scaffold630.g21889
OG0004768	CKAMA.g1566	CBRIG.CBG05587	CELEG.B0250.2	CTROP.Csp11.Scaffold630.g21888
OG0004769	CKAMA.g9412	CBRIG.CBG15358	CELEG.C17D12.2	CTROP.Csp11.Scaffold630.g19693
OG0004770	CKAMA.g9421	CBRIG.CBG19941	CELEG.Y4C6A.2	CTROP.Csp11.Scaffold470.g1642
OG0004771	CKAMA.g9422	CBRIG.CBG19929	CELEG.B0273.4	CTROP.Csp11.Scaffold470.g1638
OG0004772	CKAMA.g9427	CBRIG.CBG20192	CELEG.T02C12.1	CTROP.Csp11.Scaffold630.g17497
OG0004773	CKAMA.g9429	CBRIG.CBG20194	CELEG.T02C12.3	CTROP.Csp11.Scaffold630.g17498
OG0004774	CKAMA.g9433	CBRIG.CBG03621	CELEG.C36E8.4	CTROP.Csp11.Scaffold603.g5512
OG0004775	CKAMA.g9434	CBRIG.CBG02527	CELEG.F55C12.5	CTROP.Csp11.Scaffold630.g19438
OG0004776	CKAMA.g9438	CBRIG.CBG02524	CELEG.F55C12.4	CTROP.Csp11.Scaffold630.g19434
OG0004777	CKAMA.g9439	CBRIG.CBG02523	CELEG.H41C03.1	CTROP.Csp11.Scaffold630.g19433
OG0004778	CKAMA.g16424	CBRIG.CBG23567	CELEG.Y39F10B.1	CTROP.Csp11.Scaffold629.g9138
OG0004779	CKAMA.g9442	CBRIG.CBG02627	CELEG.C32D5.2	CTROP.Csp11.Scaffold629.g11597
OG0004780	CKAMA.g9443	CBRIG.CBG02630	CELEG.C32D5.6	CTROP.Csp11.Scaffold629.g11578
OG0004781	CKAMA.g9446	CBRIG.CBG02633	CELEG.C32D5.9	CTROP.Csp11.Scaffold629.g11580
OG0004782	CKAMA.g9447	CBRIG.CBG02635	CELEG.C32D5.11	CTROP.Csp11.Scaffold629.g11582
OG0004783	CKAMA.g9448	CBRIG.CBG02636	CELEG.C32D5.12	CTROP.Csp11.Scaffold629.g11583
OG0004784	CKAMA.g9449	CBRIG.CBG12287	CELEG.C29E4.5	CTROP.Csp11.Scaffold629.g12590
OG0004785	CKAMA.g16445	CBRIG.CBG08372	CELEG.F13B12.2	CTROP.Csp11.Scaffold630.g17772
OG0004786	CKAMA.g9459	CBRIG.CBG22468	CELEG.H06I04.2	CTROP.Csp11.Scaffold629.g9311
OG0004787	CKAMA.g9461	CBRIG.CBG22466	CELEG.H06I04.4	CTROP.Csp11.Scaffold630.g18941
OG0004788	CKAMA.g9462	CBRIG.CBG22465	CELEG.H06I04.6	CTROP.Csp11.Scaffold630.g18940
OG0004789	CKAMA.g9472	CBRIG.CBG16615	CELEG.F37C12.12	CTROP.Csp11.Scaffold489.g2038
OG0004790	CKAMA.g9473	CBRIG.CBG16614	CELEG.F37C12.11	CTROP.Csp11.Scaffold489.g2039
OG0004791	CKAMA.g9477	CBRIG.CBG08350	CELEG.F37C12.4	CTROP.Csp11.Scaffold489.g2044
OG0004792	CKAMA.g9478	CBRIG.CBG08351	CELEG.F37C12.9	CTROP.Csp11.Scaffold489.g2045
OG0004794	CKAMA.g9483	CBRIG.CBG03773	CELEG.C04F12.8	CTROP.Csp11.Scaffold629.g15318
OG0004795	CKAMA.g9484	CBRIG.CBG25225	CELEG.C04F12.5	CTROP.Csp11.Scaffold629.g15296
OG0004796	CKAMA.g9491	CBRIG.CBG03754	CELEG.T05F1.9	CTROP.Csp11.Scaffold629.g15301
OG0004797	CKAMA.g9493	CBRIG.CBG03727	CELEG.F42H11.2	CTROP.Csp11.Scaffold629.g14873
OG0004798	CKAMA.g9501	CBRIG.CBG03716	CELEG.K07A1.16	CTROP.Csp11.Scaffold629.g14678
OG0004799	CKAMA.g9502	CBRIG.CBG03715	CELEG.K07A1.15	CTROP.Csp11.Scaffold629.g14680
OG0004800	CKAMA.g9503	CBRIG.CBG03714	CELEG.K07A1.8	CTROP.Csp11.Scaffold629.g14681
OG0004801	CKAMA.g9504	CBRIG.CBG03713	CELEG.K07A1.9	CTROP.Csp11.Scaffold629.g14682
OG0004802	CKAMA.g9505	CBRIG.CBG03711	CELEG.K07A1.11	CTROP.Csp11.Scaffold629.g14684
OG0004803	CKAMA.g9506	CBRIG.CBG03710	CELEG.K07A1.12	CTROP.Csp11.Scaffold629.g14685
OG0004804	CKAMA.g9507	CBRIG.CBG03709	CELEG.T05F1.1	CTROP.Csp11.Scaffold629.g14686
OG0004805	CKAMA.g9509	CBRIG.CBG03707	CELEG.T05F1.3	CTROP.Csp11.Scaffold629.g14687
OG0004806	CKAMA.g9510	CBRIG.CBG03706	CELEG.T05F1.6	CTROP.Csp11.Scaffold629.g14688
OG0004807	CKAMA.g9511	CBRIG.CBG25220	CELEG.T05F1.4	CTROP.Csp11.Scaffold629.g14689
OG0004808	CKAMA.g9513	CBRIG.CBG03702	CELEG.C03D6.8	CTROP.Csp11.Scaffold629.g14654
OG0004809	CKAMA.g9516	CBRIG.CBG03764	CELEG.C03D6.6	CTROP.Csp11.Scaffold159.g601
OG0004810	CKAMA.g9519	CBRIG.CBG03768	CELEG.T05F1.10	CTROP.Csp11.Scaffold629.g15300
OG0004811	CKAMA.g9520	CBRIG.CBG03735	CELEG.K04G2.10	CTROP.Csp11.Scaffold629.g14882
OG0004812	CKAMA.g9521	CBRIG.CBG03733	CELEG.C36F7.4	CTROP.Csp11.Scaffold629.g14877
OG0004813	CKAMA.g9523	CBRIG.CBG03736	CELEG.F18C12.4	CTROP.Csp11.Scaffold629.g14884
OG0004814	CKAMA.g9524	CBRIG.CBG03748	CELEG.F46A9.6	CTROP.Csp11.Scaffold629.g14893
OG0004815	CKAMA.g9527	CBRIG.CBG03744	CELEG.C17E4.6	CTROP.Csp11.Scaffold629.g14885
OG0004816	CKAMA.g9528	CBRIG.CBG03740	CELEG.C17E4.11	CTROP.Csp11.Scaffold629.g14887
OG0004817	CKAMA.g9529	CBRIG.CBG03739	CELEG.C17E4.3	CTROP.Csp11.Scaffold629.g11636
OG0004818	CKAMA.g9530	CBRIG.CBG05537	CELEG.Y44A6D.5	CTROP.Csp11.Scaffold630.g21814
OG0004819	CKAMA.g9533	CBRIG.CBG03756	CELEG.F46A9.3	CTROP.Csp11.Scaffold629.g14859
OG0004820	CKAMA.g9534	CBRIG.CBG03759	CELEG.F30A10.1	CTROP.Csp11.Scaffold629.g14861
OG0004821	CKAMA.g9535	CBRIG.CBG30574	CELEG.Y69H2.15	CTROP.Csp11.Scaffold630.g17401
OG0004822	CKAMA.g16474	CBRIG.CBG00026	CELEG.C08C3.4	CTROP.Csp11.Scaffold630.g17238
OG0004823	CKAMA.g9537	CBRIG.CBG30309	CELEG.F56A8.9	CTROP.Csp11.Scaffold629.g14733
OG0004824	CKAMA.g9538	CBRIG.CBG03577	CELEG.F56A8.3	CTROP.Csp11.Scaffold629.g14732
OG0004825	CKAMA.g9541	CBRIG.CBG03570	CELEG.F56A8.7	CTROP.Csp11.Scaffold629.g14738
OG0004826	CKAMA.g16477	CBRIG.CBG13287	CELEG.Y47D3B.4	CTROP.Csp11.Scaffold629.g14929
OG0004827	CKAMA.g9546	CBRIG.CBG02399	CELEG.F07F6.5	CTROP.Csp11.Scaffold629.g11416
OG0004828	CKAMA.g9547	CBRIG.CBG02400	CELEG.F07F6.1	CTROP.Csp11.Scaffold629.g11404
OG0004829	CKAMA.g9548	CBRIG.CBG02401	CELEG.F07F6.6	CTROP.Csp11.Scaffold629.g11403
OG0004830	CKAMA.g16480	CBRIG.CBG12179	CELEG.C43E11.11	CTROP.Csp11.Scaffold627.g6648
OG0004831	CKAMA.g16487	CBRIG.CBG12088	CELEG.R12E2.11	CTROP.Csp11.Scaffold627.g6671
OG0004832	CKAMA.g16502	CBRIG.CBG02945	CELEG.T06D8.5	CTROP.Csp11.Scaffold45.g274
OG0004833	CKAMA.g9550	CBRIG.CBG22984	CELEG.K12H4.1	CTROP.Csp11.Scaffold630.g18622
OG0004834	CKAMA.g9551	CBRIG.CBG22967	CELEG.F44B9.1	CTROP.Csp11.Scaffold630.g18612
OG0004835	CKAMA.g1571	CBRIG.CBG02487	CELEG.C18A3.1	CTROP.Csp11.Scaffold630.g19396
OG0004836	CKAMA.g1572	CBRIG.CBG02488	CELEG.C18A3.6	CTROP.Csp11.Scaffold630.g19397
OG0004837	CKAMA.g1577	CBRIG.CBG02491	CELEG.C18A3.8	CTROP.Csp11.Scaffold630.g19401
OG0004838	CKAMA.g1581	CBRIG.CBG02498	CELEG.K05F1.6	CTROP.Csp11.Scaffold630.g19413
OG0004839	CKAMA.g1582	CBRIG.CBG02496	CELEG.F10C1.5	CTROP.Csp11.Scaffold630.g19410
OG0004840	CKAMA.g1584	CBRIG.CBG02500	CELEG.K05F1.5	CTROP.Csp11.Scaffold630.g19415
OG0004841	CKAMA.g1586	CBRIG.CBG02502	CELEG.K05F1.10	CTROP.Csp11.Scaffold630.g19417
OG0004842	CKAMA.g1588	CBRIG.CBG02505	CELEG.ZK1248.3	CTROP.Csp11.Scaffold630.g19418
OG0004843	CKAMA.g16517	CBRIG.CBG02834	CELEG.C47D12.2	CTROP.Csp11.Scaffold629.g9740
OG0004844	CKAMA.g9557	CBRIG.CBG10711	CELEG.Y55F3C.3	CTROP.Csp11.Scaffold629.g8858
OG0004845	CKAMA.g9571	CBRIG.CBG07207	CELEG.T23F4.2	CTROP.Csp11.Scaffold605.g5652
OG0004846	CKAMA.g9572	CBRIG.CBG07032	CELEG.T27A1.5	CTROP.Csp11.Scaffold605.g5635
OG0004847	CKAMA.g9576	CBRIG.CBG07027	CELEG.Y43H11AL.3	CTROP.Csp11.Scaffold605.g5626
OG0004848	CKAMA.g9578	CBRIG.CBG06954	CELEG.D1069.4	CTROP.Csp11.Scaffold605.g5602
OG0004849	CKAMA.g16547	CBRIG.CBG22499	CELEG.Y69A2AR.22	CTROP.Csp11.Scaffold629.g10784
OG0004850	CKAMA.g9585	CBRIG.CBG20494	CELEG.F21F3.7	CTROP.Csp11.Scaffold629.g8623
OG0004851	CKAMA.g9589	CBRIG.CBG07670	CELEG.F39B1.1	CTROP.Csp11.Scaffold558.g3810
OG0004852	CKAMA.g9591	CBRIG.CBG07671	CELEG.F46F2.3	CTROP.Csp11.Scaffold558.g3811
OG0004853	CKAMA.g9592	CBRIG.CBG07673	CELEG.F46F2.5	CTROP.Csp11.Scaffold558.g3812
OG0004854	CKAMA.g9593	CBRIG.CBG07674	CELEG.F46F2.2	CTROP.Csp11.Scaffold558.g3813
OG0004855	CKAMA.g9594	CBRIG.CBG07676	CELEG.C02D4.1	CTROP.Csp11.Scaffold558.g3814
OG0004856	CKAMA.g9595	CBRIG.CBG07677	CELEG.C02D4.2	CTROP.Csp11.Scaffold558.g3815
OG0004857	CKAMA.g9596	CBRIG.CBG07680	CELEG.Y15E3A.1	CTROP.Csp11.Scaffold558.g3816
OG0004858	CKAMA.g9597	CBRIG.CBG07681	CELEG.Y15E3A.2	CTROP.Csp11.Scaffold558.g3818
OG0004859	CKAMA.g9598	CBRIG.CBG07684	CELEG.Y15E3A.3	CTROP.Csp11.Scaffold558.g3819
OG0004860	CKAMA.g9601	CBRIG.CBG07688	CELEG.C33A11.1	CTROP.Csp11.Scaffold558.g3822
OG0004861	CKAMA.g9602	CBRIG.CBG07689	CELEG.C33A11.2	CTROP.Csp11.Scaffold558.g3823
OG0004862	CKAMA.g9603	CBRIG.CBG07691	CELEG.C33A11.4	CTROP.Csp11.Scaffold558.g3824
OG0004863	CKAMA.g9604	CBRIG.CBG07695	CELEG.F39D8.1	CTROP.Csp11.Scaffold558.g3831
OG0004864	CKAMA.g9605	CBRIG.CBG07696	CELEG.F39D8.3	CTROP.Csp11.Scaffold558.g3833
OG0004865	CKAMA.g9606	CBRIG.CBG07697	CELEG.F39D8.4	CTROP.Csp11.Scaffold558.g3834
OG0004866	CKAMA.g9607	CBRIG.CBG07698	CELEG.R03A10.1	CTROP.Csp11.Scaffold558.g3835
OG0004867	CKAMA.g9608	CBRIG.CBG07699	CELEG.W09B6.1	CTROP.Csp11.Scaffold558.g3836
OG0004868	CKAMA.g9610	CBRIG.CBG07703	CELEG.R03A10.3	CTROP.Csp11.Scaffold558.g3837
OG0004869	CKAMA.g9612	CBRIG.CBG07705	CELEG.R03A10.5	CTROP.Csp11.Scaffold558.g3839
OG0004870	CKAMA.g9613	CBRIG.CBG07706	CELEG.R03A10.6	CTROP.Csp11.Scaffold558.g3840
OG0004871	CKAMA.g9614	CBRIG.CBG07708	CELEG.C46E1.3	CTROP.Csp11.Scaffold558.g3841
OG0004872	CKAMA.g9616	CBRIG.CBG07713	CELEG.H13N06.4	CTROP.Csp11.Scaffold558.g3845
OG0004873	CKAMA.g9617	CBRIG.CBG07714	CELEG.H13N06.6	CTROP.Csp11.Scaffold629.g14810
OG0004874	CKAMA.g9619	CBRIG.CBG07716	CELEG.H13N06.5	CTROP.Csp11.Scaffold629.g14809
OG0004875	CKAMA.g9620	CBRIG.CBG07717	CELEG.H30A04.1	CTROP.Csp11.Scaffold629.g14808
OG0004876	CKAMA.g9621	CBRIG.CBG07722	CELEG.C02C6.2	CTROP.Csp11.Scaffold629.g14804
OG0004877	CKAMA.g9622	CBRIG.CBG07723	CELEG.C02C6.3	CTROP.Csp11.Scaffold629.g11170
OG0004878	CKAMA.g9624	CBRIG.CBG07728	CELEG.K09A9.6	CTROP.Csp11.Scaffold629.g11168
OG0004879	CKAMA.g9627	CBRIG.CBG07733	CELEG.K09A9.2	CTROP.Csp11.Scaffold629.g11157
OG0004880	CKAMA.g9628	CBRIG.CBG07734	CELEG.K09A9.1	CTROP.Csp11.Scaffold629.g11156
OG0004881	CKAMA.g9630	CBRIG.CBG07736	CELEG.K09E9.2	CTROP.Csp11.Scaffold629.g11153
OG0004882	CKAMA.g9632	CBRIG.CBG07740	CELEG.K09E9.1	CTROP.Csp11.Scaffold629.g11147
OG0004883	CKAMA.g9633	CBRIG.CBG07741	CELEG.K09E9.4	CTROP.Csp11.Scaffold629.g11146
OG0004884	CKAMA.g9636	CBRIG.CBG07754	CELEG.F59D12.1	CTROP.Csp11.Scaffold629.g11141
OG0004885	CKAMA.g9637	CBRIG.CBG07755	CELEG.F59D12.2	CTROP.Csp11.Scaffold629.g11140
OG0004886	CKAMA.g9638	CBRIG.CBG30815	CELEG.C03H12.1	CTROP.Csp11.Scaffold629.g11138
OG0004887	CKAMA.g9639	CBRIG.CBG07758	CELEG.ZK662.2	CTROP.Csp11.Scaffold629.g11137
OG0004888	CKAMA.g9640	CBRIG.CBG07759	CELEG.ZK662.3	CTROP.Csp11.Scaffold629.g11136
OG0004889	CKAMA.g9641	CBRIG.CBG30762	CELEG.ZK662.6	CTROP.Csp11.Scaffold629.g11135
OG0004890	CKAMA.g9652	CBRIG.CBG07781	CELEG.F46G10.6	CTROP.Csp11.Scaffold629.g11110
OG0004891	CKAMA.g9653	CBRIG.CBG07780	CELEG.F46G10.5	CTROP.Csp11.Scaffold629.g11111
OG0004892	CKAMA.g9654	CBRIG.CBG07774	CELEG.F46G10.2	CTROP.Csp11.Scaffold629.g11115
OG0004893	CKAMA.g9655	CBRIG.CBG07773	CELEG.F46G10.1	CTROP.Csp11.Scaffold629.g11116
OG0004894	CKAMA.g9660	CBRIG.CBG07765	CELEG.Y7A5A.1	CTROP.Csp11.Scaffold629.g11127
OG0004895	CKAMA.g16554	CBRIG.CBG12306	CELEG.R10E4.7	CTROP.Csp11.Scaffold629.g12565
OG0004896	CKAMA.g9665	CBRIG.CBG05824	CELEG.C06E4.7	CTROP.Csp11.Scaffold630.g21143
OG0004897	CKAMA.g1592	CBRIG.CBG19917	CELEG.T12E12.6	CTROP.Csp11.Scaffold470.g1628
OG0004899	CKAMA.g16579	CBRIG.CBG19851	CELEG.C31H1.8	CTROP.Csp11.Scaffold629.g7853
OG0004900	CKAMA.g16580	CBRIG.CBG12241	CELEG.ZK652.6	CTROP.Csp11.Scaffold609.g5824
OG0004901	CKAMA.g9673	CBRIG.CBG13273	CELEG.Y66D12A.20	CTROP.Csp11.Scaffold629.g14943
OG0004902	CKAMA.g9674	CBRIG.CBG30263	CELEG.Y66D12A.19	CTROP.Csp11.Scaffold629.g14942
OG0004903	CKAMA.g9680	CBRIG.CBG10545	CELEG.T21D12.3	CTROP.Csp11.Scaffold629.g10552
OG0004905	CKAMA.g16593	CBRIG.CBG13508	CELEG.K08E7.1	CTROP.Csp11.Scaffold629.g10660
OG0004906	CKAMA.g16597	CBRIG.CBG07103	CELEG.T23F4.3	CTROP.Csp11.Scaffold605.g5650
OG0004907	CKAMA.g9687	CBRIG.CBG18039	CELEG.F35G12.3	CTROP.Csp11.Scaffold478.g1751
OG0004908	CKAMA.g9688	CBRIG.CBG18040	CELEG.F35G12.2	CTROP.Csp11.Scaffold478.g1749
OG0004909	CKAMA.g9689	CBRIG.CBG18041	CELEG.F35G12.1	CTROP.Csp11.Scaffold544.g3447
OG0004910	CKAMA.g9690	CBRIG.CBG18042	CELEG.M88.6	CTROP.Csp11.Scaffold544.g3446
OG0004911	CKAMA.g16612	CBRIG.CBG05812	CELEG.D2024.6	CTROP.Csp11.Scaffold630.g21134
OG0004912	CKAMA.g1594	CBRIG.CBG24737	CELEG.C26C6.9	CTROP.Csp11.Scaffold629.g16221
OG0004913	CKAMA.g1595	CBRIG.CBG24698	CELEG.C26C6.2	CTROP.Csp11.Scaffold630.g21006
OG0004914	CKAMA.g1596	CBRIG.CBG08265	CELEG.R11A5.7	CTROP.Csp11.Scaffold629.g7506
OG0004915	CKAMA.g1598	CBRIG.CBG08278	CELEG.D2005.6	CTROP.Csp11.Scaffold629.g7504
OG0004916	CKAMA.g1603	CBRIG.CBG11864	CELEG.F29D11.2	CTROP.Csp11.Scaffold529.g3138
OG0004917	CKAMA.g1606	CBRIG.CBG11872	CELEG.T28F4.1	CTROP.Csp11.Scaffold529.g3135
OG0004918	CKAMA.g1608	CBRIG.CBG11868	CELEG.T28F4.4	CTROP.Csp11.Scaffold630.g16882
OG0004919	CKAMA.g16617	CBRIG.CBG07005	CELEG.F23F1.10	CTROP.Csp11.Scaffold605.g5559
OG0004921	CKAMA.g9692	CBRIG.CBG07061	CELEG.C24H12.5	CTROP.Csp11.Scaffold605.g5659
OG0004922	CKAMA.g9693	CBRIG.CBG07024	CELEG.B0432.7	CTROP.Csp11.Scaffold605.g5623
OG0004923	CKAMA.g9695	CBRIG.CBG07019	CELEG.B0432.10	CTROP.Csp11.Scaffold605.g5618
OG0004924	CKAMA.g9696	CBRIG.CBG07018	CELEG.B0432.4	CTROP.Csp11.Scaffold605.g5617
OG0004925	CKAMA.g9697	CBRIG.CBG07017	CELEG.B0432.3	CTROP.Csp11.Scaffold605.g5616
OG0004926	CKAMA.g9701	CBRIG.CBG07050	CELEG.K01A2.10	CTROP.Csp11.Scaffold605.g5609
OG0004927	CKAMA.g9702	CBRIG.CBG07051	CELEG.K01A2.1	CTROP.Csp11.Scaffold605.g5607
OG0004928	CKAMA.g16627	CBRIG.CBG07186	CELEG.F54D12.3	CTROP.Csp11.Scaffold629.g9042
OG0004930	CKAMA.g9706	CBRIG.CBG07012	CELEG.F23F1.4	CTROP.Csp11.Scaffold605.g5552
OG0004932	CKAMA.g9719	CBRIG.CBG07036	CELEG.T03F6.2	CTROP.Csp11.Scaffold605.g5632
OG0004933	CKAMA.g16630	CBRIG.CBG07173	CELEG.C13A10.1	CTROP.Csp11.Scaffold630.g18031
OG0004934	CKAMA.g16637	CBRIG.CBG13873	CELEG.Y71G10AL.1	CTROP.Csp11.Scaffold629.g10674
OG0004936	CKAMA.g16644	CBRIG.CBG02379	CELEG.F09E5.3	CTROP.Csp11.Scaffold629.g11465
OG0004937	CKAMA.g16649	CBRIG.CBG02816	CELEG.F15D4.1	CTROP.Csp11.Scaffold629.g7830
OG0004938	CKAMA.g9737	CBRIG.CBG21322	CELEG.T10F2.2	CTROP.Csp11.Scaffold629.g12524
OG0004939	CKAMA.g1609	CBRIG.CBG16622	CELEG.R151.3	CTROP.Csp11.Scaffold489.g2033
OG0004940	CKAMA.g1610	CBRIG.CBG16621	CELEG.R151.5	CTROP.Csp11.Scaffold489.g2034
OG0004941	CKAMA.g16654	CBRIG.CBG03319	CELEG.F28D1.1	CTROP.Csp11.Scaffold629.g12706
OG0004943	CKAMA.g16666	CBRIG.CBG03596	CELEG.ZK1058.9	CTROP.Csp11.Scaffold603.g5513
OG0004944	CKAMA.g16672	CBRIG.CBG13399	CELEG.ZK945.4	CTROP.Csp11.Scaffold629.g11237
OG0004945	CKAMA.g9742	CBRIG.CBG12785	CELEG.B0511.12	CTROP.Csp11.Scaffold630.g21464
OG0004946	CKAMA.g9744	CBRIG.CBG03939	CELEG.C30F12.6	CTROP.Csp11.Scaffold591.g5142
OG0004947	CKAMA.g9745	CBRIG.CBG03940	CELEG.C30F12.5	CTROP.Csp11.Scaffold591.g5143
OG0004948	CKAMA.g9746	CBRIG.CBG03944	CELEG.C01F4.2	CTROP.Csp11.Scaffold629.g12641
OG0004949	CKAMA.g9748	CBRIG.CBG14923	CELEG.F55F8.3	CTROP.Csp11.Scaffold591.g5105
OG0004950	CKAMA.g9752	CBRIG.CBG22026	CELEG.C12C8.3	CTROP.Csp11.Scaffold629.g15198
OG0004951	CKAMA.g9754	CBRIG.CBG16943	CELEG.F25H5.6	CTROP.Csp11.Scaffold629.g8122
OG0004952	CKAMA.g9760	CBRIG.CBG16939	CELEG.C45G3.5	CTROP.Csp11.Scaffold629.g9818
OG0004953	CKAMA.g9763	CBRIG.CBG16935	CELEG.F36H2.2	CTROP.Csp11.Scaffold629.g8129
OG0004954	CKAMA.g9766	CBRIG.CBG16936	CELEG.F36H2.3	CTROP.Csp11.Scaffold629.g9795
OG0004955	CKAMA.g9767	CBRIG.CBG19478	CELEG.F14B4.1	CTROP.Csp11.Scaffold629.g15024
OG0004956	CKAMA.g9768	CBRIG.CBG19477	CELEG.F26H9.7	CTROP.Csp11.Scaffold629.g15207
OG0004957	CKAMA.g9769	CBRIG.CBG19476	CELEG.F26H9.6	CTROP.Csp11.Scaffold629.g15208
OG0004958	CKAMA.g9771	CBRIG.CBG19471	CELEG.F26H9.2	CTROP.Csp11.Scaffold629.g15203
OG0004959	CKAMA.g9772	CBRIG.CBG19470	CELEG.F26H9.1	CTROP.Csp11.Scaffold629.g15204
OG0004960	CKAMA.g9773	CBRIG.CBG19469	CELEG.F14B4.3	CTROP.Csp11.Scaffold629.g15205
OG0004961	CKAMA.g9775	CBRIG.CBG22021	CELEG.F26H9.5	CTROP.Csp11.Scaffold629.g15201
OG0004962	CKAMA.g9778	CBRIG.CBG05143	CELEG.Y65B4A.2	CTROP.Csp11.Scaffold629.g9814
OG0004963	CKAMA.g9781	CBRIG.CBG15082	CELEG.C07C7.1	CTROP.Csp11.Scaffold523.g2966
OG0004964	CKAMA.g9785	CBRIG.CBG15077	CELEG.Y11D7A.3	CTROP.Csp11.Scaffold523.g2962
OG0004965	CKAMA.g9787	CBRIG.CBG15075	CELEG.Y11D7A.4	CTROP.Csp11.Scaffold523.g2959
OG0004966	CKAMA.g9790	CBRIG.CBG15070	CELEG.Y11D7A.8	CTROP.Csp11.Scaffold629.g14879
OG0004967	CKAMA.g9792	CBRIG.CBG15064	CELEG.Y11D7A.10	CTROP.Csp11.Scaffold629.g14863
OG0004968	CKAMA.g9795	CBRIG.CBG15057	CELEG.Y11D7A.19	CTROP.Csp11.Scaffold629.g9882
OG0004969	CKAMA.g9796	CBRIG.CBG15055	CELEG.Y11D7A.13	CTROP.Csp11.Scaffold629.g14866
OG0004970	CKAMA.g9797	CBRIG.CBG15043	CELEG.Y11D7A.14	CTROP.Csp11.Scaffold630.g20307
OG0004971	CKAMA.g9798	CBRIG.CBG15039	CELEG.C09G12.1	CTROP.Csp11.Scaffold630.g20311
OG0004972	CKAMA.g9806	CBRIG.CBG15027	CELEG.Y37E11C.1	CTROP.Csp11.Scaffold630.g20315
OG0004973	CKAMA.g1615	CBRIG.CBG05777	CELEG.C34D4.12	CTROP.Csp11.Scaffold630.g21106
OG0004974	CKAMA.g1619	CBRIG.CBG05797	CELEG.C42D4.3	CTROP.Csp11.Scaffold630.g21120
OG0004975	CKAMA.g1620	CBRIG.CBG05801	CELEG.C42D4.13	CTROP.Csp11.Scaffold630.g21125
OG0004976	CKAMA.g1621	CBRIG.CBG05802	CELEG.C42D4.1	CTROP.Csp11.Scaffold630.g21126
OG0004977	CKAMA.g1622	CBRIG.CBG05803	CELEG.R13A1.5	CTROP.Csp11.Scaffold630.g21127
OG0004978	CKAMA.g1623	CBRIG.CBG05804	CELEG.R13A1.9	CTROP.Csp11.Scaffold630.g21128
OG0004979	CKAMA.g1624	CBRIG.CBG05830	CELEG.F42C5.2	CTROP.Csp11.Scaffold630.g21151
OG0004980	CKAMA.g1625	CBRIG.CBG26349	CELEG.F42C5.6	CTROP.Csp11.Scaffold630.g21152
OG0004981	CKAMA.g1626	CBRIG.CBG05832	CELEG.F42C5.7	CTROP.Csp11.Scaffold630.g21153
OG0004982	CKAMA.g1627	CBRIG.CBG05834	CELEG.F42C5.9	CTROP.Csp11.Scaffold630.g21155
OG0004983	CKAMA.g1630	CBRIG.CBG05835	CELEG.F42C5.10	CTROP.Csp11.Scaffold630.g21156
OG0004984	CKAMA.g1632	CBRIG.CBG05837	CELEG.Y40C5A.2	CTROP.Csp11.Scaffold630.g21157
OG0004985	CKAMA.g1633	CBRIG.CBG05881	CELEG.F55G1.9	CTROP.Csp11.Scaffold630.g21163
OG0004986	CKAMA.g1634	CBRIG.CBG05880	CELEG.F55G1.5	CTROP.Csp11.Scaffold630.g21164
OG0004987	CKAMA.g1635	CBRIG.CBG05879	CELEG.F55G1.6	CTROP.Csp11.Scaffold630.g21165
OG0004988	CKAMA.g1640	CBRIG.CBG05868	CELEG.B0496.8	CTROP.Csp11.Scaffold630.g21168
OG0004989	CKAMA.g1643	CBRIG.CBG05865	CELEG.B0496.3	CTROP.Csp11.Scaffold630.g21170
OG0004990	CKAMA.g1644	CBRIG.CBG05861	CELEG.B0496.5	CTROP.Csp11.Scaffold630.g21171
OG0004991	CKAMA.g1645	CBRIG.CBG05860	CELEG.B0496.6	CTROP.Csp11.Scaffold630.g21173
OG0004992	CKAMA.g1646	CBRIG.CBG05858	CELEG.C48A7.1	CTROP.Csp11.Scaffold630.g21172
OG0004993	CKAMA.g1649	CBRIG.CBG05852	CELEG.T12B3.4	CTROP.Csp11.Scaffold630.g21175
OG0004994	CKAMA.g1652	CBRIG.CBG05849	CELEG.T12B3.3	CTROP.Csp11.Scaffold630.g21178
OG0004995	CKAMA.g1653	CBRIG.CBG05848	CELEG.Y40C5A.4	CTROP.Csp11.Scaffold630.g21179
OG0004996	CKAMA.g1654	CBRIG.CBG05845	CELEG.Y40C5A.3	CTROP.Csp11.Scaffold630.g21180
OG0004997	CKAMA.g1660	CBRIG.CBG05888	CELEG.F55G1.1	CTROP.Csp11.Scaffold630.g21187
OG0004998	CKAMA.g1661	CBRIG.CBG30983	CELEG.F55G1.13	CTROP.Csp11.Scaffold630.g21188
OG0004999	CKAMA.g1662	CBRIG.CBG05893	CELEG.R05G6.6	CTROP.Csp11.Scaffold630.g21190
OG0005000	CKAMA.g1663	CBRIG.CBG05894	CELEG.R05G6.7	CTROP.Csp11.Scaffold630.g21191
OG0005001	CKAMA.g1664	CBRIG.CBG05895	CELEG.R05G6.5	CTROP.Csp11.Scaffold630.g21192
OG0005002	CKAMA.g1665	CBRIG.CBG05896	CELEG.R05G6.8	CTROP.Csp11.Scaffold630.g21193
OG0005003	CKAMA.g1666	CBRIG.CBG05897	CELEG.R05G6.4	CTROP.Csp11.Scaffold630.g21194
OG0005004	CKAMA.g1667	CBRIG.CBG05898	CELEG.R05G6.9	CTROP.Csp11.Scaffold630.g21195
OG0005005	CKAMA.g1669	CBRIG.CBG26336	CELEG.R05G6.1	CTROP.Csp11.Scaffold630.g21199
OG0005006	CKAMA.g1670	CBRIG.CBG05905	CELEG.F49E8.3	CTROP.Csp11.Scaffold630.g21200
OG0005007	CKAMA.g1672	CBRIG.CBG05908	CELEG.F49E8.5	CTROP.Csp11.Scaffold630.g21202
OG0005008	CKAMA.g1673	CBRIG.CBG05910	CELEG.F49E8.7	CTROP.Csp11.Scaffold630.g21204
OG0005009	CKAMA.g1674	CBRIG.CBG05911	CELEG.F49E8.1	CTROP.Csp11.Scaffold630.g21205
OG0005010	CKAMA.g1675	CBRIG.CBG05912	CELEG.F32E10.4	CTROP.Csp11.Scaffold630.g21206
OG0005011	CKAMA.g1676	CBRIG.CBG05914	CELEG.F32E10.3	CTROP.Csp11.Scaffold630.g21208
OG0005012	CKAMA.g16679	CBRIG.CBG07179	CELEG.Y57G7A.11	CTROP.Csp11.Scaffold605.g5688
OG0005013	CKAMA.g16681	CBRIG.CBG21337	CELEG.ZC247.1	CTROP.Csp11.Scaffold629.g16077
OG0005014	CKAMA.g9807	CBRIG.CBG16607	CELEG.K04G7.10	CTROP.Csp11.Scaffold489.g2055
OG0005015	CKAMA.g9812	CBRIG.CBG09785	CELEG.C34C12.6	CTROP.Csp11.Scaffold629.g9484
OG0005016	CKAMA.g9813	CBRIG.CBG09211	CELEG.C14B1.8	CTROP.Csp11.Scaffold629.g9526
OG0005017	CKAMA.g9814	CBRIG.CBG25960	CELEG.C14B1.10	CTROP.Csp11.Scaffold629.g9524
OG0005018	CKAMA.g9820	CBRIG.CBG09204	CELEG.C14B1.2	CTROP.Csp11.Scaffold629.g9520
OG0005019	CKAMA.g9822	CBRIG.CBG09202	CELEG.T27D1.1	CTROP.Csp11.Scaffold629.g9517
OG0005020	CKAMA.g9824	CBRIG.CBG09746	CELEG.T27D1.3	CTROP.Csp11.Scaffold629.g9513
OG0005021	CKAMA.g16696	CBRIG.CBG08370	CELEG.F13B12.5	CTROP.Csp11.Scaffold630.g17773
OG0005022	CKAMA.g9828	CBRIG.CBG13975	CELEG.F58H7.3	CTROP.Csp11.Scaffold630.g20799
OG0005023	CKAMA.g9829	CBRIG.CBG13976	CELEG.F58H7.1	CTROP.Csp11.Scaffold630.g20800
OG0005024	CKAMA.g9830	CBRIG.CBG13977	CELEG.C44C8.6	CTROP.Csp11.Scaffold630.g20791
OG0005025	CKAMA.g9834	CBRIG.CBG23162	CELEG.T03F7.5	CTROP.Csp11.Scaffold495.g2192
OG0005026	CKAMA.g9835	CBRIG.CBG23166	CELEG.T03F7.2	CTROP.Csp11.Scaffold495.g2197
OG0005027	CKAMA.g9836	CBRIG.CBG23167	CELEG.T03F7.1	CTROP.Csp11.Scaffold495.g2198
OG0005028	CKAMA.g9837	CBRIG.CBG23168	CELEG.T03F7.7	CTROP.Csp11.Scaffold495.g2200
OG0005029	CKAMA.g9838	CBRIG.CBG23169	CELEG.F47G9.3	CTROP.Csp11.Scaffold495.g2201
OG0005030	CKAMA.g9839	CBRIG.CBG23170	CELEG.F47G9.4	CTROP.Csp11.Scaffold495.g2202
OG0005031	CKAMA.g9840	CBRIG.CBG23171	CELEG.F47G9.1	CTROP.Csp11.Scaffold495.g2203
OG0005032	CKAMA.g9841	CBRIG.CBG09715	CELEG.C29A12.1	CTROP.Csp11.Scaffold629.g15573
OG0005033	CKAMA.g9842	CBRIG.CBG23173	CELEG.T02E9.6	CTROP.Csp11.Scaffold495.g2205
OG0005034	CKAMA.g9843	CBRIG.CBG23175	CELEG.T02E9.5	CTROP.Csp11.Scaffold629.g12621
OG0005035	CKAMA.g9844	CBRIG.CBG23176	CELEG.T02E9.2	CTROP.Csp11.Scaffold629.g12622
OG0005036	CKAMA.g9845	CBRIG.CBG23177	CELEG.T02E9.1	CTROP.Csp11.Scaffold629.g12623
OG0005037	CKAMA.g16698	CBRIG.CBG05626	CELEG.F53F8.5	CTROP.Csp11.Scaffold630.g21835
OG0005038	CKAMA.g9847	CBRIG.CBG16204	CELEG.C15A7.2	CTROP.Csp11.Scaffold629.g13390
OG0005039	CKAMA.g9855	CBRIG.CBG16197	CELEG.B0198.1	CTROP.Csp11.Scaffold629.g13393
OG0005040	CKAMA.g9856	CBRIG.CBG16196	CELEG.B0198.2	CTROP.Csp11.Scaffold629.g13394
OG0005041	CKAMA.g9857	CBRIG.CBG16195	CELEG.VW06B3R.1	CTROP.Csp11.Scaffold629.g13395
OG0005042	CKAMA.g9858	CBRIG.CBG16194	CELEG.W06B3.1	CTROP.Csp11.Scaffold629.g13396
OG0005043	CKAMA.g9859	CBRIG.CBG16192	CELEG.W06B3.2	CTROP.Csp11.Scaffold629.g13400
OG0005044	CKAMA.g9860	CBRIG.CBG30809	CELEG.C49F5.7	CTROP.Csp11.Scaffold629.g13401
OG0005045	CKAMA.g9863	CBRIG.CBG16188	CELEG.C35B8.4	CTROP.Csp11.Scaffold629.g13404
OG0005046	CKAMA.g9865	CBRIG.CBG16186	CELEG.C35B8.2	CTROP.Csp11.Scaffold629.g13406
OG0005047	CKAMA.g9866	CBRIG.CBG16183	CELEG.F18G5.4	CTROP.Csp11.Scaffold629.g13408
OG0005048	CKAMA.g9867	CBRIG.CBG16182	CELEG.F18G5.3	CTROP.Csp11.Scaffold629.g13409
OG0005049	CKAMA.g9868	CBRIG.CBG16180	CELEG.F18G5.2	CTROP.Csp11.Scaffold629.g13410
OG0005050	CKAMA.g9871	CBRIG.CBG16174	CELEG.F18G5.6	CTROP.Csp11.Scaffold629.g13413
OG0005051	CKAMA.g9873	CBRIG.CBG16169	CELEG.B0416.3	CTROP.Csp11.Scaffold629.g13418
OG0005052	CKAMA.g9875	CBRIG.CBG16166	CELEG.B0416.7	CTROP.Csp11.Scaffold629.g13420
OG0005053	CKAMA.g9878	CBRIG.CBG16163	CELEG.B0416.1	CTROP.Csp11.Scaffold629.g13424
OG0005054	CKAMA.g9879	CBRIG.CBG16160	CELEG.F35G8.1	CTROP.Csp11.Scaffold629.g13425
OG0005055	CKAMA.g9880	CBRIG.CBG16159	CELEG.T20B5.2	CTROP.Csp11.Scaffold629.g13426
OG0005056	CKAMA.g9882	CBRIG.CBG16157	CELEG.T20B5.3	CTROP.Csp11.Scaffold629.g13428
OG0005057	CKAMA.g9883	CBRIG.CBG16150	CELEG.E01H11.1	CTROP.Csp11.Scaffold629.g13431
OG0005058	CKAMA.g9884	CBRIG.CBG16149	CELEG.C23F12.4	CTROP.Csp11.Scaffold629.g13433
OG0005059	CKAMA.g9887	CBRIG.CBG16145	CELEG.C23F12.1	CTROP.Csp11.Scaffold629.g13447
OG0005060	CKAMA.g9891	CBRIG.CBG16136	CELEG.B0272.2	CTROP.Csp11.Scaffold629.g13441
OG0005061	CKAMA.g9892	CBRIG.CBG16135	CELEG.ZK899.1	CTROP.Csp11.Scaffold629.g13440
OG0005062	CKAMA.g9893	CBRIG.CBG27444	CELEG.ZK899.7	CTROP.Csp11.Scaffold629.g13439
OG0005063	CKAMA.g9894	CBRIG.CBG16133	CELEG.ZK899.2	CTROP.Csp11.Scaffold629.g13438
OG0005064	CKAMA.g9895	CBRIG.CBG16132	CELEG.ZK899.3	CTROP.Csp11.Scaffold629.g13437
OG0005065	CKAMA.g9900	CBRIG.CBG16118	CELEG.ZK899.8	CTROP.Csp11.Scaffold629.g13458
OG0005066	CKAMA.g9901	CBRIG.CBG16116	CELEG.C07B5.6	CTROP.Csp11.Scaffold629.g13459
OG0005067	CKAMA.g9902	CBRIG.CBG16115	CELEG.C07B5.3	CTROP.Csp11.Scaffold629.g13460
OG0005068	CKAMA.g9914	CBRIG.CBG16082	CELEG.F49E2.4	CTROP.Csp11.Scaffold629.g13468
OG0005069	CKAMA.g9918	CBRIG.CBG05593	CELEG.Y59A8B.20	CTROP.Csp11.Scaffold630.g21882
OG0005070	CKAMA.g9919	CBRIG.CBG05646	CELEG.Y59A8B.21	CTROP.Csp11.Scaffold630.g21881
OG0005071	CKAMA.g9922	CBRIG.CBG13284	CELEG.Y47D3B.7	CTROP.Csp11.Scaffold629.g14936
OG0005072	CKAMA.g9923	CBRIG.CBG13285	CELEG.Y47D3B.6	CTROP.Csp11.Scaffold629.g14935
OG0005074	CKAMA.g9924	CBRIG.CBG09369	CELEG.C18C4.9	CTROP.Csp11.Scaffold460.g1463
OG0005075	CKAMA.g9928	CBRIG.CBG09374	CELEG.C18C4.2	CTROP.Csp11.Scaffold460.g1459
OG0005076	CKAMA.g9929	CBRIG.CBG03473	CELEG.W08D2.7	CTROP.Csp11.Scaffold585.g4853
OG0005077	CKAMA.g9933	CBRIG.CBG03476	CELEG.W08D2.1	CTROP.Csp11.Scaffold585.g4856
OG0005078	CKAMA.g9934	CBRIG.CBG03477	CELEG.W08D2.3	CTROP.Csp11.Scaffold585.g4858
OG0005079	CKAMA.g9935	CBRIG.CBG03479	CELEG.W08D2.4	CTROP.Csp11.Scaffold585.g4859
OG0005080	CKAMA.g9938	CBRIG.CBG03482	CELEG.T13F2.3	CTROP.Csp11.Scaffold585.g4862
OG0005081	CKAMA.g9940	CBRIG.CBG03483	CELEG.C26H9A.1	CTROP.Csp11.Scaffold585.g4863
OG0005082	CKAMA.g9943	CBRIG.CBG03484	CELEG.C26H9A.2	CTROP.Csp11.Scaffold585.g4864
OG0005083	CKAMA.g9944	CBRIG.CBG03486	CELEG.T23B5.1	CTROP.Csp11.Scaffold585.g4866
OG0005084	CKAMA.g9946	CBRIG.CBG24834	CELEG.C27D8.4	CTROP.Csp11.Scaffold585.g4869
OG0005085	CKAMA.g9949	CBRIG.CBG03493	CELEG.T23F6.4	CTROP.Csp11.Scaffold585.g4874
OG0005086	CKAMA.g9950	CBRIG.CBG03494	CELEG.T23F6.5	CTROP.Csp11.Scaffold585.g4875
OG0005087	CKAMA.g9951	CBRIG.CBG01600	CELEG.C36H8.1	CTROP.Csp11.Scaffold585.g4877
OG0005088	CKAMA.g9952	CBRIG.CBG22306	CELEG.C36H8.2	CTROP.Csp11.Scaffold585.g4876
OG0005089	CKAMA.g9953	CBRIG.CBG22307	CELEG.C36H8.3	CTROP.Csp11.Scaffold484.g1903
OG0005090	CKAMA.g9954	CBRIG.CBG22310	CELEG.ZK897.1	CTROP.Csp11.Scaffold457.g1387
OG0005092	CKAMA.g9959	CBRIG.CBG01664	CELEG.Y38C1AA.1	CTROP.Csp11.Scaffold629.g12253
OG0005093	CKAMA.g9960	CBRIG.CBG01662	CELEG.Y38C1AA.2	CTROP.Csp11.Scaffold629.g12256
OG0005094	CKAMA.g9961	CBRIG.CBG30434	CELEG.Y38C1AA.12	CTROP.Csp11.Scaffold629.g12257
OG0005095	CKAMA.g9962	CBRIG.CBG01661	CELEG.Y38C1AA.3	CTROP.Csp11.Scaffold629.g12258
OG0005096	CKAMA.g9963	CBRIG.CBG01658	CELEG.Y38C1AA.5	CTROP.Csp11.Scaffold629.g12261
OG0005097	CKAMA.g9965	CBRIG.CBG01656	CELEG.C01G12.8	CTROP.Csp11.Scaffold629.g12263
OG0005098	CKAMA.g9967	CBRIG.CBG01654	CELEG.Y38C1AA.9	CTROP.Csp11.Scaffold629.g12265
OG0005099	CKAMA.g9968	CBRIG.CBG01652	CELEG.F29C4.8	CTROP.Csp11.Scaffold629.g12268
OG0005100	CKAMA.g9969	CBRIG.CBG01651	CELEG.F29C4.1	CTROP.Csp11.Scaffold629.g12269
OG0005101	CKAMA.g9970	CBRIG.CBG01648	CELEG.F29C4.2	CTROP.Csp11.Scaffold629.g12271
OG0005102	CKAMA.g9971	CBRIG.CBG01647	CELEG.F29C4.7	CTROP.Csp11.Scaffold629.g12272
OG0005103	CKAMA.g9972	CBRIG.CBG01645	CELEG.B0545.1	CTROP.Csp11.Scaffold629.g12274
OG0005104	CKAMA.g9973	CBRIG.CBG01643	CELEG.B0545.3	CTROP.Csp11.Scaffold629.g12276
OG0005106	CKAMA.g9977	CBRIG.CBG01635	CELEG.F15E6.2	CTROP.Csp11.Scaffold630.g20133
OG0005107	CKAMA.g9980	CBRIG.CBG01632	CELEG.T26C12.3	CTROP.Csp11.Scaffold629.g7588
OG0005108	CKAMA.g9983	CBRIG.CBG01628	CELEG.W08E12.6	CTROP.Csp11.Scaffold629.g7585
OG0005109	CKAMA.g9986	CBRIG.CBG01622	CELEG.W08E12.1	CTROP.Csp11.Scaffold629.g7580
OG0005110	CKAMA.g9987	CBRIG.CBG01620	CELEG.M04G7.1	CTROP.Csp11.Scaffold629.g7578
OG0005111	CKAMA.g9988	CBRIG.CBG01619	CELEG.M04G7.3	CTROP.Csp11.Scaffold629.g7577
OG0005112	CKAMA.g9989	CBRIG.CBG01616	CELEG.W03G1.5	CTROP.Csp11.Scaffold629.g7575
OG0005113	CKAMA.g9990	CBRIG.CBG01615	CELEG.W03G1.6	CTROP.Csp11.Scaffold629.g7572
OG0005114	CKAMA.g9991	CBRIG.CBG01607	CELEG.W03G1.1	CTROP.Csp11.Scaffold629.g7574
OG0005115	CKAMA.g9992	CBRIG.CBG01609	CELEG.F56A11.4	CTROP.Csp11.Scaffold629.g7570
OG0005116	CKAMA.g9993	CBRIG.CBG01610	CELEG.F56A11.3	CTROP.Csp11.Scaffold629.g7566
OG0005117	CKAMA.g9994	CBRIG.CBG01611	CELEG.F56A11.5	CTROP.Csp11.Scaffold629.g7567
OG0005118	CKAMA.g9995	CBRIG.CBG01612	CELEG.F56A11.1	CTROP.Csp11.Scaffold629.g7564
OG0005119	CKAMA.g10000	CBRIG.CBG01669	CELEG.W03B1.4	CTROP.Csp11.Scaffold629.g12247
OG0005120	CKAMA.g10002	CBRIG.CBG01673	CELEG.F55F10.1	CTROP.Csp11.Scaffold589.g4941
OG0005121	CKAMA.g10003	CBRIG.CBG12483	CELEG.F59A3.4	CTROP.Csp11.Scaffold630.g20474
OG0005122	CKAMA.g10004	CBRIG.CBG12482	CELEG.F59A3.3	CTROP.Csp11.Scaffold630.g20475
OG0005123	CKAMA.g10005	CBRIG.CBG12481	CELEG.C09D4.1	CTROP.Csp11.Scaffold630.g20476
OG0005124	CKAMA.g10007	CBRIG.CBG25340	CELEG.C09D4.4	CTROP.Csp11.Scaffold630.g20477
OG0005125	CKAMA.g10009	CBRIG.CBG12477	CELEG.C09D4.3	CTROP.Csp11.Scaffold630.g20480
OG0005126	CKAMA.g10011	CBRIG.CBG12474	CELEG.F27C1.11	CTROP.Csp11.Scaffold630.g20483
OG0005127	CKAMA.g10012	CBRIG.CBG12308	CELEG.F27C1.2	CTROP.Csp11.Scaffold630.g20486
OG0005128	CKAMA.g10013	CBRIG.CBG12309	CELEG.F27C1.7	CTROP.Csp11.Scaffold630.g20487
OG0005129	CKAMA.g10016	CBRIG.CBG12310	CELEG.F27C1.6	CTROP.Csp11.Scaffold630.g20488
OG0005130	CKAMA.g10019	CBRIG.CBG12313	CELEG.C30H7.2	CTROP.Csp11.Scaffold630.g20489
OG0005131	CKAMA.g10021	CBRIG.CBG12316	CELEG.C24A11.8	CTROP.Csp11.Scaffold630.g20491
OG0005132	CKAMA.g10026	CBRIG.CBG12324	CELEG.F55A12.3	CTROP.Csp11.Scaffold630.g20498
OG0005133	CKAMA.g10028	CBRIG.CBG12327	CELEG.F55A12.8	CTROP.Csp11.Scaffold630.g20500
OG0005134	CKAMA.g10029	CBRIG.CBG12328	CELEG.F55A12.5	CTROP.Csp11.Scaffold630.g20501
OG0005135	CKAMA.g10036	CBRIG.CBG12332	CELEG.F48C1.7	CTROP.Csp11.Scaffold629.g10906
OG0005136	CKAMA.g10037	CBRIG.CBG12333	CELEG.F48C1.1	CTROP.Csp11.Scaffold629.g10907
OG0005137	CKAMA.g10038	CBRIG.CBG12335	CELEG.F48C1.6	CTROP.Csp11.Scaffold630.g20505
OG0005138	CKAMA.g10039	CBRIG.CBG12336	CELEG.F48C1.5	CTROP.Csp11.Scaffold630.g20506
OG0005139	CKAMA.g10040	CBRIG.CBG12337	CELEG.C01G8.9	CTROP.Csp11.Scaffold630.g20508
OG0005140	CKAMA.g10041	CBRIG.CBG12338	CELEG.C01G8.6	CTROP.Csp11.Scaffold630.g20509
OG0005141	CKAMA.g10042	CBRIG.CBG12339	CELEG.K07A12.4	CTROP.Csp11.Scaffold630.g20510
OG0005142	CKAMA.g10043	CBRIG.CBG12340	CELEG.K07A12.7	CTROP.Csp11.Scaffold630.g20511
OG0005143	CKAMA.g10044	CBRIG.CBG12341	CELEG.K07A12.3	CTROP.Csp11.Scaffold630.g20512
OG0005144	CKAMA.g10045	CBRIG.CBG12343	CELEG.F39H11.5	CTROP.Csp11.Scaffold630.g20513
OG0005145	CKAMA.g10046	CBRIG.CBG12344	CELEG.F39H11.1	CTROP.Csp11.Scaffold630.g20514
OG0005146	CKAMA.g10049	CBRIG.CBG12347	CELEG.C36B1.1	CTROP.Csp11.Scaffold630.g20520
OG0005147	CKAMA.g10050	CBRIG.CBG12349	CELEG.C36B1.4	CTROP.Csp11.Scaffold630.g20521
OG0005148	CKAMA.g10051	CBRIG.CBG12350	CELEG.C36B1.3	CTROP.Csp11.Scaffold630.g20522
OG0005151	CKAMA.g10058	CBRIG.CBG12355	CELEG.C36B1.5	CTROP.Csp11.Scaffold630.g20524
OG0005152	CKAMA.g10059	CBRIG.CBG12356	CELEG.C36B1.7	CTROP.Csp11.Scaffold630.g20525
OG0005153	CKAMA.g10060	CBRIG.CBG12357	CELEG.C36B1.8	CTROP.Csp11.Scaffold630.g20526
OG0005154	CKAMA.g10061	CBRIG.CBG12358	CELEG.C36B1.9	CTROP.Csp11.Scaffold630.g20528
OG0005155	CKAMA.g10062	CBRIG.CBG12359	CELEG.C36B1.12	CTROP.Csp11.Scaffold630.g20529
OG0005156	CKAMA.g10063	CBRIG.CBG25272	CELEG.DY3.8	CTROP.Csp11.Scaffold630.g20531
OG0005157	CKAMA.g10064	CBRIG.CBG12362	CELEG.DY3.1	CTROP.Csp11.Scaffold630.g20532
OG0005158	CKAMA.g10065	CBRIG.CBG12363	CELEG.DY3.2	CTROP.Csp11.Scaffold630.g20533
OG0005159	CKAMA.g10066	CBRIG.CBG12364	CELEG.DY3.3	CTROP.Csp11.Scaffold630.g20534
OG0005160	CKAMA.g10067	CBRIG.CBG12365	CELEG.DY3.4	CTROP.Csp11.Scaffold630.g20536
OG0005161	CKAMA.g10068	CBRIG.CBG12366	CELEG.DY3.5	CTROP.Csp11.Scaffold630.g20537
OG0005162	CKAMA.g10069	CBRIG.CBG12367	CELEG.DY3.6	CTROP.Csp11.Scaffold630.g20538
OG0005163	CKAMA.g10070	CBRIG.CBG12369	CELEG.DY3.7	CTROP.Csp11.Scaffold630.g20539
OG0005164	CKAMA.g10071	CBRIG.CBG12370	CELEG.F36A2.3	CTROP.Csp11.Scaffold630.g20541
OG0005165	CKAMA.g10073	CBRIG.CBG12372	CELEG.F36A2.1	CTROP.Csp11.Scaffold630.g20543
OG0005166	CKAMA.g10074	CBRIG.CBG12373	CELEG.F36A2.4	CTROP.Csp11.Scaffold630.g20544
OG0005167	CKAMA.g10075	CBRIG.CBG12375	CELEG.F36A2.7	CTROP.Csp11.Scaffold630.g20546
OG0005168	CKAMA.g10076	CBRIG.CBG12376	CELEG.F36A2.6	CTROP.Csp11.Scaffold630.g20547
OG0005169	CKAMA.g10077	CBRIG.CBG12377	CELEG.F36A2.9	CTROP.Csp11.Scaffold630.g20548
OG0005170	CKAMA.g10082	CBRIG.CBG12380	CELEG.F29D10.4	CTROP.Csp11.Scaffold630.g20551
OG0005171	CKAMA.g10083	CBRIG.CBG12382	CELEG.F55H12.6	CTROP.Csp11.Scaffold630.g20553
OG0005172	CKAMA.g10084	CBRIG.CBG12385	CELEG.C03C11.2	CTROP.Csp11.Scaffold630.g20555
OG0005173	CKAMA.g10087	CBRIG.CBG31129	CELEG.F55H12.2	CTROP.Csp11.Scaffold630.g20556
OG0005174	CKAMA.g10088	CBRIG.CBG12386	CELEG.F55H12.3	CTROP.Csp11.Scaffold630.g20557
OG0005175	CKAMA.g10090	CBRIG.CBG03923	CELEG.C06A5.7	CTROP.Csp11.Scaffold591.g5135
OG0005176	CKAMA.g10091	CBRIG.CBG03922	CELEG.C06A5.11	CTROP.Csp11.Scaffold591.g5134
OG0005177	CKAMA.g10092	CBRIG.CBG03921	CELEG.C06A5.3	CTROP.Csp11.Scaffold591.g5132
OG0005178	CKAMA.g16706	CBRIG.CBG02453	CELEG.C17G10.1	CTROP.Csp11.Scaffold629.g11364
OG0005179	CKAMA.g10094	CBRIG.CBG22549	CELEG.T21D12.4	CTROP.Csp11.Scaffold629.g10568
OG0005180	CKAMA.g10099	CBRIG.CBG22551	CELEG.C44B12.2	CTROP.Csp11.Scaffold629.g10566
OG0005181	CKAMA.g10100	CBRIG.CBG22550	CELEG.T21D12.12	CTROP.Csp11.Scaffold629.g10567
OG0005182	CKAMA.g1695	CBRIG.CBG05660	CELEG.F59A1.6	CTROP.Csp11.Scaffold630.g21859
OG0005183	CKAMA.g1696	CBRIG.CBG05658	CELEG.F59A1.15	CTROP.Csp11.Scaffold630.g21857
OG0005185	CKAMA.g1701	CBRIG.CBG04341	CELEG.F09D1.1	CTROP.Csp11.Scaffold630.g16982
OG0005186	CKAMA.g1703	CBRIG.CBG31219	CELEG.Y43F8C.13	CTROP.Csp11.Scaffold630.g21900
OG0005187	CKAMA.g1704	CBRIG.CBG31388	CELEG.Y43F8B.1	CTROP.Csp11.Scaffold630.g21934
OG0005188	CKAMA.g1709	CBRIG.CBG05673	CELEG.B0399.1	CTROP.Csp11.Scaffold630.g21912
OG0005189	CKAMA.g16713	CBRIG.CBG03601	CELEG.ZK1058.2	CTROP.Csp11.Scaffold603.g5511
OG0005190	CKAMA.g10106	CBRIG.CBG23344	CELEG.C52E4.2	CTROP.Csp11.Scaffold629.g7747
OG0005191	CKAMA.g10107	CBRIG.CBG23345	CELEG.C52E4.3	CTROP.Csp11.Scaffold629.g7748
OG0005192	CKAMA.g10109	CBRIG.CBG23347	CELEG.C52E4.5	CTROP.Csp11.Scaffold629.g7750
OG0005193	CKAMA.g10110	CBRIG.CBG23349	CELEG.C52E4.7	CTROP.Csp11.Scaffold629.g7752
OG0005194	CKAMA.g16717	CBRIG.CBG24680	CELEG.ZK121.1	CTROP.Csp11.Scaffold628.g7429
OG0005195	CKAMA.g10120	CBRIG.CBG13510	CELEG.K08E7.5	CTROP.Csp11.Scaffold629.g10658
OG0005196	CKAMA.g10121	CBRIG.CBG13511	CELEG.K08E7.6	CTROP.Csp11.Scaffold629.g10657
OG0005197	CKAMA.g1711	CBRIG.CBG03181	CELEG.F46C5.8	CTROP.Csp11.Scaffold630.g20683
OG0005198	CKAMA.g1712	CBRIG.CBG03180	CELEG.F46C5.9	CTROP.Csp11.Scaffold630.g20682
OG0005199	CKAMA.g1713	CBRIG.CBG03178	CELEG.F07H5.9	CTROP.Csp11.Scaffold630.g20680
OG0005200	CKAMA.g1714	CBRIG.CBG03177	CELEG.F07H5.8	CTROP.Csp11.Scaffold630.g20679
OG0005201	CKAMA.g1715	CBRIG.CBG03175	CELEG.F07H5.7	CTROP.Csp11.Scaffold629.g7707
OG0005202	CKAMA.g1718	CBRIG.CBG03169	CELEG.F07H5.2	CTROP.Csp11.Scaffold629.g7710
OG0005203	CKAMA.g1719	CBRIG.CBG03168	CELEG.K08F8.6	CTROP.Csp11.Scaffold629.g7711
OG0005204	CKAMA.g1720	CBRIG.CBG03166	CELEG.K08F8.4	CTROP.Csp11.Scaffold629.g7713
OG0005205	CKAMA.g1722	CBRIG.CBG03163	CELEG.Y53F4B.28	CTROP.Csp11.Scaffold629.g7716
OG0005206	CKAMA.g1723	CBRIG.CBG03161	CELEG.T01B7.4	CTROP.Csp11.Scaffold629.g7718
OG0005207	CKAMA.g1724	CBRIG.CBG03160	CELEG.T01B7.5	CTROP.Csp11.Scaffold629.g7719
OG0005208	CKAMA.g1725	CBRIG.CBG03159	CELEG.T01B7.6	CTROP.Csp11.Scaffold51.g322
OG0005209	CKAMA.g1726	CBRIG.CBG03158	CELEG.T01B7.9	CTROP.Csp11.Scaffold51.g323
OG0005210	CKAMA.g1727	CBRIG.CBG03154	CELEG.T01B7.7	CTROP.Csp11.Scaffold51.g325
OG0005211	CKAMA.g1728	CBRIG.CBG03131	CELEG.F13D12.7	CTROP.Csp11.Scaffold458.g1410
OG0005212	CKAMA.g1730	CBRIG.CBG03133	CELEG.F13D12.8	CTROP.Csp11.Scaffold458.g1412
OG0005213	CKAMA.g1731	CBRIG.CBG03134	CELEG.F13D12.4	CTROP.Csp11.Scaffold458.g1413
OG0005214	CKAMA.g1732	CBRIG.CBG03136	CELEG.F13D12.2	CTROP.Csp11.Scaffold458.g1416
OG0005215	CKAMA.g1735	CBRIG.CBG03140	CELEG.F13D12.9	CTROP.Csp11.Scaffold458.g1420
OG0005216	CKAMA.g1736	CBRIG.CBG03139	CELEG.VF13D12L.3	CTROP.Csp11.Scaffold458.g1421
OG0005217	CKAMA.g1739	CBRIG.CBG03141	CELEG.C47D12.8	CTROP.Csp11.Scaffold458.g1424
OG0005218	CKAMA.g1740	CBRIG.CBG03144	CELEG.C47D12.6	CTROP.Csp11.Scaffold458.g1426
OG0005219	CKAMA.g1742	CBRIG.CBG03145	CELEG.Y53F4B.22	CTROP.Csp11.Scaffold458.g1428
OG0005220	CKAMA.g1744	CBRIG.CBG03148	CELEG.K08F8.3	CTROP.Csp11.Scaffold458.g1430
OG0005221	CKAMA.g1745	CBRIG.CBG03149	CELEG.K08F8.7	CTROP.Csp11.Scaffold458.g1431
OG0005222	CKAMA.g1746	CBRIG.CBG03150	CELEG.K08F8.2	CTROP.Csp11.Scaffold458.g1432
OG0005223	CKAMA.g1747	CBRIG.CBG03152	CELEG.K08F8.1	CTROP.Csp11.Scaffold51.g329
OG0005224	CKAMA.g1749	CBRIG.CBG03127	CELEG.F22B3.8	CTROP.Csp11.Scaffold458.g1408
OG0005225	CKAMA.g1750	CBRIG.CBG03126	CELEG.F44E5.1	CTROP.Csp11.Scaffold458.g1407
OG0005226	CKAMA.g1751	CBRIG.CBG03125	CELEG.F43G6.9	CTROP.Csp11.Scaffold458.g1406
OG0005227	CKAMA.g1754	CBRIG.CBG20976	CELEG.F15A4.5	CTROP.Csp11.Scaffold629.g9218
OG0005228	CKAMA.g1756	CBRIG.CBG00905	CELEG.ZK1067.7	CTROP.Csp11.Scaffold50.g297
OG0005229	CKAMA.g1758	CBRIG.CBG00906	CELEG.ZK1067.2	CTROP.Csp11.Scaffold562.g3950
OG0005230	CKAMA.g1759	CBRIG.CBG00911	CELEG.ZK1067.1	CTROP.Csp11.Scaffold630.g21395
OG0005231	CKAMA.g1760	CBRIG.CBG00908	CELEG.ZK1067.6	CTROP.Csp11.Scaffold630.g21386
OG0005232	CKAMA.g1761	CBRIG.CBG00927	CELEG.T23G7.5	CTROP.Csp11.Scaffold630.g21385
OG0005233	CKAMA.g1762	CBRIG.CBG00928	CELEG.T23G7.4	CTROP.Csp11.Scaffold630.g21383
OG0005234	CKAMA.g1764	CBRIG.CBG00935	CELEG.T23G7.1	CTROP.Csp11.Scaffold630.g21381
OG0005235	CKAMA.g1765	CBRIG.CBG00934	CELEG.T23G7.2	CTROP.Csp11.Scaffold630.g21380
OG0005236	CKAMA.g1766	CBRIG.CBG00937	CELEG.W07A12.8	CTROP.Csp11.Scaffold630.g21376
OG0005237	CKAMA.g1768	CBRIG.CBG00912	CELEG.W07A12.4	CTROP.Csp11.Scaffold630.g21398
OG0005238	CKAMA.g1769	CBRIG.CBG00915	CELEG.Y9C2UA.1	CTROP.Csp11.Scaffold630.g21397
OG0005239	CKAMA.g1771	CBRIG.CBG00939	CELEG.T26C5.2	CTROP.Csp11.Scaffold630.g21400
OG0005240	CKAMA.g1772	CBRIG.CBG00943	CELEG.T26C5.3	CTROP.Csp11.Scaffold630.g21391
OG0005241	CKAMA.g1774	CBRIG.CBG00920	CELEG.C01G6.1	CTROP.Csp11.Scaffold630.g21403
OG0005242	CKAMA.g1775	CBRIG.CBG00919	CELEG.C01G6.3	CTROP.Csp11.Scaffold630.g21404
OG0005243	CKAMA.g1776	CBRIG.CBG20225	CELEG.D2013.8	CTROP.Csp11.Scaffold562.g3947
OG0005244	CKAMA.g1777	CBRIG.CBG20228	CELEG.D2013.5	CTROP.Csp11.Scaffold562.g3944
OG0005245	CKAMA.g1778	CBRIG.CBG20230	CELEG.D2013.1	CTROP.Csp11.Scaffold562.g3942
OG0005246	CKAMA.g1780	CBRIG.CBG20232	CELEG.D2013.3	CTROP.Csp11.Scaffold562.g3940
OG0005247	CKAMA.g1781	CBRIG.CBG20223	CELEG.C01G6.8	CTROP.Csp11.Scaffold562.g3936
OG0005248	CKAMA.g1782	CBRIG.CBG00884	CELEG.C01G6.9	CTROP.Csp11.Scaffold50.g295
OG0005249	CKAMA.g1783	CBRIG.CBG00883	CELEG.C01G6.7	CTROP.Csp11.Scaffold50.g294
OG0005250	CKAMA.g1784	CBRIG.CBG00882	CELEG.C01G6.6	CTROP.Csp11.Scaffold562.g3957
OG0005251	CKAMA.g1785	CBRIG.CBG31298	CELEG.C01G6.5	CTROP.Csp11.Scaffold562.g3955
OG0005252	CKAMA.g1786	CBRIG.CBG00875	CELEG.C01G6.4	CTROP.Csp11.Scaffold562.g3952
OG0005253	CKAMA.g1788	CBRIG.CBG00873	CELEG.F42A8.1	CTROP.Csp11.Scaffold562.g3951
OG0005254	CKAMA.g1789	CBRIG.CBG00872	CELEG.F42A8.2	CTROP.Csp11.Scaffold629.g15060
OG0005255	CKAMA.g1791	CBRIG.CBG13395	CELEG.M176.2	CTROP.Csp11.Scaffold629.g7923
OG0005256	CKAMA.g1793	CBRIG.CBG13393	CELEG.M176.4	CTROP.Csp11.Scaffold629.g7922
OG0005257	CKAMA.g1794	CBRIG.CBG13392	CELEG.M176.10	CTROP.Csp11.Scaffold629.g7920
OG0005258	CKAMA.g1795	CBRIG.CBG13391	CELEG.M176.5	CTROP.Csp11.Scaffold629.g7919
OG0005260	CKAMA.g1799	CBRIG.CBG13353	CELEG.C08B11.1	CTROP.Csp11.Scaffold630.g18473
OG0005261	CKAMA.g1800	CBRIG.CBG13352	CELEG.C08B11.2	CTROP.Csp11.Scaffold630.g18470
OG0005262	CKAMA.g1801	CBRIG.CBG13351	CELEG.C08B11.3	CTROP.Csp11.Scaffold630.g18469
OG0005263	CKAMA.g1802	CBRIG.CBG13350	CELEG.C08B11.4	CTROP.Csp11.Scaffold630.g18468
OG0005264	CKAMA.g1805	CBRIG.CBG13346	CELEG.C08B11.7	CTROP.Csp11.Scaffold629.g10281
OG0005265	CKAMA.g1810	CBRIG.CBG13342	CELEG.T05H10.8	CTROP.Csp11.Scaffold629.g10288
OG0005266	CKAMA.g1812	CBRIG.CBG13338	CELEG.T05H10.7	CTROP.Csp11.Scaffold629.g10293
OG0005267	CKAMA.g1813	CBRIG.CBG13337	CELEG.K02C4.2	CTROP.Csp11.Scaffold629.g10294
OG0005268	CKAMA.g1814	CBRIG.CBG00736	CELEG.K02C4.5	CTROP.Csp11.Scaffold629.g10299
OG0005269	CKAMA.g1815	CBRIG.CBG00738	CELEG.K02C4.3	CTROP.Csp11.Scaffold629.g10298
OG0005270	CKAMA.g1816	CBRIG.CBG00733	CELEG.K02C4.4	CTROP.Csp11.Scaffold629.g10297
OG0005271	CKAMA.g1818	CBRIG.CBG00735	CELEG.C41C4.10	CTROP.Csp11.Scaffold629.g10301
OG0005272	CKAMA.g1819	CBRIG.CBG13334	CELEG.C41C4.3	CTROP.Csp11.Scaffold629.g10304
OG0005273	CKAMA.g1820	CBRIG.CBG13333	CELEG.C41C4.4	CTROP.Csp11.Scaffold630.g18493
OG0005274	CKAMA.g1821	CBRIG.CBG00750	CELEG.C41C4.5	CTROP.Csp11.Scaffold630.g18496
OG0005275	CKAMA.g1824	CBRIG.CBG00748	CELEG.C41C4.6	CTROP.Csp11.Scaffold630.g18498
OG0005276	CKAMA.g1825	CBRIG.CBG00747	CELEG.C41C4.7	CTROP.Csp11.Scaffold630.g18500
OG0005277	CKAMA.g1827	CBRIG.CBG00745	CELEG.F10B5.8	CTROP.Csp11.Scaffold630.g18502
OG0005278	CKAMA.g1828	CBRIG.CBG00744	CELEG.F10B5.1	CTROP.Csp11.Scaffold630.g18503
OG0005279	CKAMA.g1829	CBRIG.CBG00743	CELEG.F10B5.2	CTROP.Csp11.Scaffold630.g18504
OG0005280	CKAMA.g1830	CBRIG.CBG00742	CELEG.F10B5.3	CTROP.Csp11.Scaffold630.g18505
OG0005281	CKAMA.g1831	CBRIG.CBG00741	CELEG.F10B5.4	CTROP.Csp11.Scaffold630.g18509
OG0005282	CKAMA.g1833	CBRIG.CBG00732	CELEG.F10B5.5	CTROP.Csp11.Scaffold630.g18510
OG0005283	CKAMA.g1834	CBRIG.CBG00731	CELEG.F10B5.6	CTROP.Csp11.Scaffold630.g18512
OG0005284	CKAMA.g1835	CBRIG.CBG00730	CELEG.F10B5.7	CTROP.Csp11.Scaffold630.g18514
OG0005285	CKAMA.g1836	CBRIG.CBG00729	CELEG.T05C12.11	CTROP.Csp11.Scaffold630.g18515
OG0005286	CKAMA.g1837	CBRIG.CBG00726	CELEG.T05C12.2	CTROP.Csp11.Scaffold630.g18519
OG0005287	CKAMA.g1838	CBRIG.CBG00724	CELEG.T05C12.4	CTROP.Csp11.Scaffold630.g18492
OG0005288	CKAMA.g1839	CBRIG.CBG00723	CELEG.T05C12.5	CTROP.Csp11.Scaffold630.g18490
OG0005289	CKAMA.g1840	CBRIG.CBG00722	CELEG.T05C12.6	CTROP.Csp11.Scaffold630.g18486
OG0005290	CKAMA.g1841	CBRIG.CBG00721	CELEG.T05C12.7	CTROP.Csp11.Scaffold630.g18485
OG0005291	CKAMA.g1842	CBRIG.CBG00720	CELEG.T05C12.8	CTROP.Csp11.Scaffold630.g18484
OG0005292	CKAMA.g1843	CBRIG.CBG00717	CELEG.T05C12.10	CTROP.Csp11.Scaffold630.g21281
OG0005293	CKAMA.g1844	CBRIG.CBG00716	CELEG.M110.1	CTROP.Csp11.Scaffold630.g21283
OG0005294	CKAMA.g1845	CBRIG.CBG00714	CELEG.M110.8	CTROP.Csp11.Scaffold630.g21282
OG0005295	CKAMA.g1846	CBRIG.CBG00713	CELEG.M110.2	CTROP.Csp11.Scaffold630.g21285
OG0005296	CKAMA.g1847	CBRIG.CBG00710	CELEG.M110.3	CTROP.Csp11.Scaffold630.g21287
OG0005297	CKAMA.g1852	CBRIG.CBG00653	CELEG.M110.7	CTROP.Csp11.Scaffold630.g18478
OG0005298	CKAMA.g1855	CBRIG.CBG00663	CELEG.F35C11.7	CTROP.Csp11.Scaffold629.g8231
OG0005299	CKAMA.g1856	CBRIG.CBG00664	CELEG.F35C11.6	CTROP.Csp11.Scaffold629.g8230
OG0005300	CKAMA.g1857	CBRIG.CBG00666	CELEG.K01C8.1	CTROP.Csp11.Scaffold629.g8234
OG0005301	CKAMA.g1858	CBRIG.CBG00667	CELEG.K01C8.2	CTROP.Csp11.Scaffold629.g8235
OG0005302	CKAMA.g1859	CBRIG.CBG00668	CELEG.K01C8.3	CTROP.Csp11.Scaffold629.g8236
OG0005303	CKAMA.g1860	CBRIG.CBG00669	CELEG.K01C8.5	CTROP.Csp11.Scaffold629.g8237
OG0005304	CKAMA.g1861	CBRIG.CBG00670	CELEG.K01C8.7	CTROP.Csp11.Scaffold629.g8238
OG0005305	CKAMA.g1862	CBRIG.CBG00671	CELEG.K01C8.6	CTROP.Csp11.Scaffold629.g8239
OG0005306	CKAMA.g1863	CBRIG.CBG00672	CELEG.K01C8.8	CTROP.Csp11.Scaffold629.g8240
OG0005307	CKAMA.g1864	CBRIG.CBG00673	CELEG.K01C8.9	CTROP.Csp11.Scaffold629.g8241
OG0005308	CKAMA.g1866	CBRIG.CBG00684	CELEG.F14F11.2	CTROP.Csp11.Scaffold630.g21405
OG0005309	CKAMA.g1871	CBRIG.CBG00693	CELEG.C26D10.3	CTROP.Csp11.Scaffold630.g17446
OG0005310	CKAMA.g1872	CBRIG.CBG00694	CELEG.C26D10.2	CTROP.Csp11.Scaffold630.g17447
OG0005311	CKAMA.g1874	CBRIG.CBG25497	CELEG.C26D10.4	CTROP.Csp11.Scaffold423.g1142
OG0005312	CKAMA.g1876	CBRIG.CBG00701	CELEG.C26D10.6	CTROP.Csp11.Scaffold629.g14202
OG0005313	CKAMA.g1878	CBRIG.CBG00705	CELEG.M195.3	CTROP.Csp11.Scaffold630.g22149
OG0005314	CKAMA.g1879	CBRIG.CBG00651	CELEG.F49E12.4	CTROP.Csp11.Scaffold629.g8249
OG0005315	CKAMA.g1880	CBRIG.CBG00649	CELEG.F49E12.1	CTROP.Csp11.Scaffold629.g8250
OG0005316	CKAMA.g1882	CBRIG.CBG00646	CELEG.F49E12.8	CTROP.Csp11.Scaffold629.g8246
OG0005317	CKAMA.g1885	CBRIG.CBG00645	CELEG.F49E12.12	CTROP.Csp11.Scaffold629.g8253
OG0005318	CKAMA.g1886	CBRIG.CBG00681	CELEG.F49E12.5	CTROP.Csp11.Scaffold629.g8244
OG0005319	CKAMA.g1887	CBRIG.CBG00680	CELEG.F49E12.6	CTROP.Csp11.Scaffold629.g8245
OG0005320	CKAMA.g1888	CBRIG.CBG00683	CELEG.F14E5.2	CTROP.Csp11.Scaffold630.g21335
OG0005321	CKAMA.g1890	CBRIG.CBG13153	CELEG.C07D10.5	CTROP.Csp11.Scaffold455.g1345
OG0005322	CKAMA.g1894	CBRIG.CBG13150	CELEG.F43E2.7	CTROP.Csp11.Scaffold455.g1348
OG0005323	CKAMA.g1897	CBRIG.CBG13147	CELEG.F43E2.3	CTROP.Csp11.Scaffold455.g1352
OG0005324	CKAMA.g1901	CBRIG.CBG13139	CELEG.F21D12.5	CTROP.Csp11.Scaffold526.g3077
OG0005325	CKAMA.g1902	CBRIG.CBG13138	CELEG.F21D12.3	CTROP.Csp11.Scaffold526.g3075
OG0005326	CKAMA.g1903	CBRIG.CBG13137	CELEG.F45E12.6	CTROP.Csp11.Scaffold526.g3074
OG0005327	CKAMA.g1904	CBRIG.CBG13136	CELEG.F45E12.1	CTROP.Csp11.Scaffold526.g3073
OG0005328	CKAMA.g1906	CBRIG.CBG13132	CELEG.F45E12.3	CTROP.Csp11.Scaffold526.g3069
OG0005329	CKAMA.g1908	CBRIG.CBG13131	CELEG.C30G12.1	CTROP.Csp11.Scaffold526.g3067
OG0005330	CKAMA.g1909	CBRIG.CBG13130	CELEG.C30G12.7	CTROP.Csp11.Scaffold526.g3065
OG0005331	CKAMA.g1910	CBRIG.CBG13129	CELEG.C30G12.6	CTROP.Csp11.Scaffold526.g3064
OG0005332	CKAMA.g1911	CBRIG.CBG13128	CELEG.C30G12.2	CTROP.Csp11.Scaffold526.g3063
OG0005333	CKAMA.g1912	CBRIG.CBG13119	CELEG.C30G12.4	CTROP.Csp11.Scaffold526.g3061
OG0005334	CKAMA.g1914	CBRIG.CBG13116	CELEG.F32A5.1	CTROP.Csp11.Scaffold485.g1926
OG0005335	CKAMA.g1915	CBRIG.CBG13115	CELEG.F32A5.7	CTROP.Csp11.Scaffold485.g1927
OG0005336	CKAMA.g1916	CBRIG.CBG13114	CELEG.F32A5.6	CTROP.Csp11.Scaffold485.g1928
OG0005337	CKAMA.g1917	CBRIG.CBG13113	CELEG.F32A5.2	CTROP.Csp11.Scaffold485.g1929
OG0005338	CKAMA.g1918	CBRIG.CBG13111	CELEG.F32A5.5	CTROP.Csp11.Scaffold485.g1930
OG0005339	CKAMA.g1919	CBRIG.CBG13109	CELEG.F32A5.3	CTROP.Csp11.Scaffold485.g1931
OG0005340	CKAMA.g1920	CBRIG.CBG13105	CELEG.F32A5.4	CTROP.Csp11.Scaffold485.g1932
OG0005341	CKAMA.g1921	CBRIG.CBG13104	CELEG.E04F6.11	CTROP.Csp11.Scaffold485.g1934
OG0005342	CKAMA.g1922	CBRIG.CBG13103	CELEG.E04F6.10	CTROP.Csp11.Scaffold485.g1935
OG0005343	CKAMA.g1931	CBRIG.CBG13088	CELEG.E04F6.5	CTROP.Csp11.Scaffold485.g1947
OG0005344	CKAMA.g1932	CBRIG.CBG13083	CELEG.E04F6.4	CTROP.Csp11.Scaffold485.g1948
OG0005345	CKAMA.g1933	CBRIG.CBG13084	CELEG.C27H5.6	CTROP.Csp11.Scaffold485.g1949
OG0005346	CKAMA.g1934	CBRIG.CBG13085	CELEG.C27H5.1	CTROP.Csp11.Scaffold485.g1950
OG0005347	CKAMA.g1935	CBRIG.CBG13087	CELEG.C27H5.8	CTROP.Csp11.Scaffold582.g4703
OG0005348	CKAMA.g1937	CBRIG.CBG13077	CELEG.C27H5.4	CTROP.Csp11.Scaffold629.g12148
OG0005349	CKAMA.g1938	CBRIG.CBG13074	CELEG.T07F8.2	CTROP.Csp11.Scaffold629.g12151
OG0005350	CKAMA.g1939	CBRIG.CBG13073	CELEG.T07F8.3	CTROP.Csp11.Scaffold629.g12152
OG0005351	CKAMA.g1941	CBRIG.CBG13071	CELEG.F10E7.4	CTROP.Csp11.Scaffold629.g12154
OG0005352	CKAMA.g1942	CBRIG.CBG13070	CELEG.F10E7.10	CTROP.Csp11.Scaffold629.g12155
OG0005353	CKAMA.g1943	CBRIG.CBG13069	CELEG.F10E7.6	CTROP.Csp11.Scaffold629.g12156
OG0005354	CKAMA.g1944	CBRIG.CBG13068	CELEG.F10E7.5	CTROP.Csp11.Scaffold629.g12157
OG0005355	CKAMA.g1945	CBRIG.CBG13067	CELEG.F10E7.9	CTROP.Csp11.Scaffold629.g12158
OG0005356	CKAMA.g1946	CBRIG.CBG13066	CELEG.F10E7.7	CTROP.Csp11.Scaffold629.g12159
OG0005357	CKAMA.g1947	CBRIG.CBG13065	CELEG.F10E7.8	CTROP.Csp11.Scaffold629.g12160
OG0005358	CKAMA.g1948	CBRIG.CBG11217	CELEG.T02G5.3	CTROP.Csp11.Scaffold629.g12164
OG0005359	CKAMA.g1949	CBRIG.CBG24740	CELEG.T02G5.7	CTROP.Csp11.Scaffold629.g12165
OG0005360	CKAMA.g1951	CBRIG.CBG24742	CELEG.T02G5.9	CTROP.Csp11.Scaffold629.g12167
OG0005361	CKAMA.g1952	CBRIG.CBG24743	CELEG.ZK1127.11	CTROP.Csp11.Scaffold629.g12168
OG0005362	CKAMA.g1953	CBRIG.CBG24744	CELEG.ZK1127.1	CTROP.Csp11.Scaffold629.g12169
OG0005364	CKAMA.g1958	CBRIG.CBG11211	CELEG.ZK1127.5	CTROP.Csp11.Scaffold629.g12141
OG0005365	CKAMA.g1959	CBRIG.CBG11210	CELEG.ZK1127.9	CTROP.Csp11.Scaffold629.g12139
OG0005366	CKAMA.g1960	CBRIG.CBG11208	CELEG.C09B8.8	CTROP.Csp11.Scaffold629.g12137
OG0005367	CKAMA.g1961	CBRIG.CBG11206	CELEG.C52E12.1	CTROP.Csp11.Scaffold629.g12135
OG0005368	CKAMA.g1962	CBRIG.CBG11205	CELEG.C52E12.6	CTROP.Csp11.Scaffold629.g12134
OG0005369	CKAMA.g1963	CBRIG.CBG11204	CELEG.C52E12.4	CTROP.Csp11.Scaffold629.g12133
OG0005370	CKAMA.g1964	CBRIG.CBG11203	CELEG.C52E12.3	CTROP.Csp11.Scaffold629.g12132
OG0005371	CKAMA.g1965	CBRIG.CBG11201	CELEG.C52E12.2	CTROP.Csp11.Scaffold629.g12131
OG0005372	CKAMA.g1966	CBRIG.CBG11199	CELEG.C15F1.1	CTROP.Csp11.Scaffold629.g12129
OG0005373	CKAMA.g1967	CBRIG.CBG11198	CELEG.C15F1.2	CTROP.Csp11.Scaffold629.g12128
OG0005374	CKAMA.g1969	CBRIG.CBG11196	CELEG.C15F1.6	CTROP.Csp11.Scaffold629.g12125
OG0005375	CKAMA.g1970	CBRIG.CBG11195	CELEG.C15F1.5	CTROP.Csp11.Scaffold629.g12124
OG0005376	CKAMA.g1971	CBRIG.CBG11192	CELEG.F22D3.1	CTROP.Csp11.Scaffold629.g12119
OG0005377	CKAMA.g10133	CBRIG.CBG16406	CELEG.C30F2.1	CTROP.Csp11.Scaffold629.g13374
OG0005378	CKAMA.g10134	CBRIG.CBG16405	CELEG.C30F2.4	CTROP.Csp11.Scaffold629.g13372
OG0005379	CKAMA.g10135	CBRIG.CBG16404	CELEG.C30F2.2	CTROP.Csp11.Scaffold629.g13371
OG0005380	CKAMA.g10136	CBRIG.CBG16402	CELEG.C30F2.3	CTROP.Csp11.Scaffold629.g13370
OG0005381	CKAMA.g10137	CBRIG.CBG16401	CELEG.C30F2.5	CTROP.Csp11.Scaffold629.g13369
OG0005382	CKAMA.g10138	CBRIG.CBG16398	CELEG.ZK1073.2	CTROP.Csp11.Scaffold629.g13367
OG0005383	CKAMA.g10139	CBRIG.CBG16397	CELEG.ZK1073.1	CTROP.Csp11.Scaffold629.g13366
OG0005384	CKAMA.g10140	CBRIG.CBG16396	CELEG.F09C8.2	CTROP.Csp11.Scaffold629.g13365
OG0005385	CKAMA.g10141	CBRIG.CBG16394	CELEG.F09C8.1	CTROP.Csp11.Scaffold629.g13363
OG0005386	CKAMA.g10142	CBRIG.CBG16393	CELEG.R11.2	CTROP.Csp11.Scaffold629.g13362
OG0005387	CKAMA.g10143	CBRIG.CBG16392	CELEG.R11.1	CTROP.Csp11.Scaffold629.g13361
OG0005388	CKAMA.g10144	CBRIG.CBG16391	CELEG.R11.3	CTROP.Csp11.Scaffold629.g13360
OG0005390	CKAMA.g10147	CBRIG.CBG27401	CELEG.F52E10.4	CTROP.Csp11.Scaffold629.g13355
OG0005391	CKAMA.g10150	CBRIG.CBG16378	CELEG.T01B4.3	CTROP.Csp11.Scaffold629.g13353
OG0005392	CKAMA.g10152	CBRIG.CBG16374	CELEG.W09B12.1	CTROP.Csp11.Scaffold629.g13349
OG0005393	CKAMA.g10153	CBRIG.CBG16373	CELEG.F01G12.2	CTROP.Csp11.Scaffold629.g13348
OG0005394	CKAMA.g10157	CBRIG.CBG16368	CELEG.T24D11.1	CTROP.Csp11.Scaffold629.g13345
OG0005395	CKAMA.g10158	CBRIG.CBG16364	CELEG.F38E9.5	CTROP.Csp11.Scaffold629.g13343
OG0005396	CKAMA.g10159	CBRIG.CBG16363	CELEG.F38E9.2	CTROP.Csp11.Scaffold629.g13342
OG0005397	CKAMA.g10160	CBRIG.CBG16360	CELEG.K05G3.3	CTROP.Csp11.Scaffold629.g13339
OG0005398	CKAMA.g10175	CBRIG.CBG13293	CELEG.Y47D3B.1	CTROP.Csp11.Scaffold629.g14928
OG0005399	CKAMA.g10176	CBRIG.CBG13292	CELEG.Y47D3B.2	CTROP.Csp11.Scaffold629.g14932
OG0005400	CKAMA.g10179	CBRIG.CBG16045	CELEG.F15G9.4	CTROP.Csp11.Scaffold629.g13488
OG0005401	CKAMA.g10185	CBRIG.CBG16011	CELEG.T09B9.3	CTROP.Csp11.Scaffold629.g13491
OG0005402	CKAMA.g10187	CBRIG.CBG16008	CELEG.F59F4.1	CTROP.Csp11.Scaffold629.g13493
OG0005403	CKAMA.g10188	CBRIG.CBG16006	CELEG.F59F4.3	CTROP.Csp11.Scaffold629.g13494
OG0005404	CKAMA.g10189	CBRIG.CBG16005	CELEG.F59F4.4	CTROP.Csp11.Scaffold629.g13495
OG0005405	CKAMA.g10192	CBRIG.CBG15998	CELEG.F53H4.5	CTROP.Csp11.Scaffold629.g13498
OG0005406	CKAMA.g10193	CBRIG.CBG15997	CELEG.F53H4.3	CTROP.Csp11.Scaffold629.g13499
OG0005407	CKAMA.g10194	CBRIG.CBG15996	CELEG.F31B9.1	CTROP.Csp11.Scaffold629.g13501
OG0005408	CKAMA.g1974	CBRIG.CBG16223	CELEG.M153.3	CTROP.Csp11.Scaffold629.g13230
OG0005409	CKAMA.g1975	CBRIG.CBG16222	CELEG.M153.5	CTROP.Csp11.Scaffold629.g13231
OG0005410	CKAMA.g1976	CBRIG.CBG16221	CELEG.M153.1	CTROP.Csp11.Scaffold629.g13232
OG0005411	CKAMA.g1977	CBRIG.CBG16220	CELEG.M153.4	CTROP.Csp11.Scaffold629.g13233
OG0005412	CKAMA.g1979	CBRIG.CBG16216	CELEG.F57G12.1	CTROP.Csp11.Scaffold629.g13237
OG0005413	CKAMA.g1980	CBRIG.CBG16213	CELEG.C23H4.1	CTROP.Csp11.Scaffold629.g13238
OG0005414	CKAMA.g1981	CBRIG.CBG16269	CELEG.C23H4.8	CTROP.Csp11.Scaffold629.g13239
OG0005415	CKAMA.g1984	CBRIG.CBG16265	CELEG.E01G6.2	CTROP.Csp11.Scaffold629.g13245
OG0005416	CKAMA.g1985	CBRIG.CBG16264	CELEG.E01G6.1	CTROP.Csp11.Scaffold629.g13246
OG0005418	CKAMA.g16746	CBRIG.CBG19633	CELEG.Y25C1A.7	CTROP.Csp11.Scaffold629.g9197
OG0005419	CKAMA.g10198	CBRIG.CBG07583	CELEG.C05G5.2	CTROP.Csp11.Scaffold629.g10043
OG0005420	CKAMA.g10199	CBRIG.CBG07584	CELEG.C05G5.3	CTROP.Csp11.Scaffold629.g10042
OG0005421	CKAMA.g10201	CBRIG.CBG07586	CELEG.C05G5.5	CTROP.Csp11.Scaffold629.g10040
OG0005422	CKAMA.g10202	CBRIG.CBG07588	CELEG.Y16B4A.2	CTROP.Csp11.Scaffold629.g10039
OG0005423	CKAMA.g10203	CBRIG.CBG07590	CELEG.Y16B4A.1	CTROP.Csp11.Scaffold629.g10038
OG0005425	CKAMA.g10205	CBRIG.CBG07592	CELEG.F42D1.3	CTROP.Csp11.Scaffold629.g10036
OG0005426	CKAMA.g10206	CBRIG.CBG07594	CELEG.T04C10.4	CTROP.Csp11.Scaffold629.g10034
OG0005427	CKAMA.g10207	CBRIG.CBG07595	CELEG.T04C10.3	CTROP.Csp11.Scaffold629.g10032
OG0005428	CKAMA.g10208	CBRIG.CBG07596	CELEG.T04C10.2	CTROP.Csp11.Scaffold629.g10031
OG0005429	CKAMA.g10209	CBRIG.CBG07597	CELEG.T04C10.1	CTROP.Csp11.Scaffold629.g10030
OG0005430	CKAMA.g10210	CBRIG.CBG07598	CELEG.C27C12.7	CTROP.Csp11.Scaffold629.g10029
OG0005431	CKAMA.g10212	CBRIG.CBG07602	CELEG.C27C12.4	CTROP.Csp11.Scaffold629.g10027
OG0005432	CKAMA.g10213	CBRIG.CBG07603	CELEG.C27C12.6	CTROP.Csp11.Scaffold629.g10026
OG0005433	CKAMA.g10215	CBRIG.CBG07605	CELEG.F31F6.4	CTROP.Csp11.Scaffold629.g10025
OG0005434	CKAMA.g10216	CBRIG.CBG07607	CELEG.F31F6.5	CTROP.Csp11.Scaffold629.g10024
OG0005435	CKAMA.g10217	CBRIG.CBG07609	CELEG.F31F6.7	CTROP.Csp11.Scaffold629.g10022
OG0005436	CKAMA.g10218	CBRIG.CBG07610	CELEG.Y70D2A.2	CTROP.Csp11.Scaffold629.g10021
OG0005437	CKAMA.g10219	CBRIG.CBG07661	CELEG.Y70D2A.1	CTROP.Csp11.Scaffold629.g10020
OG0005438	CKAMA.g10220	CBRIG.CBG07660	CELEG.F14F4.1	CTROP.Csp11.Scaffold629.g10019
OG0005439	CKAMA.g10221	CBRIG.CBG07659	CELEG.F14F4.3	CTROP.Csp11.Scaffold629.g10018
OG0005440	CKAMA.g10222	CBRIG.CBG07657	CELEG.F45B8.4	CTROP.Csp11.Scaffold629.g10017
OG0005441	CKAMA.g10223	CBRIG.CBG07655	CELEG.F45B8.3	CTROP.Csp11.Scaffold629.g10016
OG0005442	CKAMA.g10224	CBRIG.CBG07654	CELEG.F20D1.1	CTROP.Csp11.Scaffold629.g10015
OG0005443	CKAMA.g10225	CBRIG.CBG07653	CELEG.F20D1.2	CTROP.Csp11.Scaffold629.g10014
OG0005444	CKAMA.g10226	CBRIG.CBG07652	CELEG.F20D1.3	CTROP.Csp11.Scaffold629.g10013
OG0005445	CKAMA.g10227	CBRIG.CBG07651	CELEG.F20D1.10	CTROP.Csp11.Scaffold629.g10012
OG0005446	CKAMA.g10228	CBRIG.CBG07650	CELEG.F20D1.6	CTROP.Csp11.Scaffold629.g10002
OG0005447	CKAMA.g10229	CBRIG.CBG07649	CELEG.F20D1.7	CTROP.Csp11.Scaffold629.g10001
OG0005448	CKAMA.g10230	CBRIG.CBG07648	CELEG.F20D1.8	CTROP.Csp11.Scaffold466.g1589
OG0005449	CKAMA.g10231	CBRIG.CBG07647	CELEG.F20D1.9	CTROP.Csp11.Scaffold466.g1590
OG0005450	CKAMA.g10232	CBRIG.CBG07646	CELEG.C18B12.6	CTROP.Csp11.Scaffold466.g1591
OG0005451	CKAMA.g10233	CBRIG.CBG07642	CELEG.C18B12.2	CTROP.Csp11.Scaffold466.g1594
OG0005452	CKAMA.g10234	CBRIG.CBG07641	CELEG.C18B12.3	CTROP.Csp11.Scaffold466.g1595
OG0005453	CKAMA.g16752	CBRIG.CBG01045	CELEG.Y53C12B.5	CTROP.Csp11.Scaffold629.g8893
OG0005454	CKAMA.g16753	CBRIG.CBG16605	CELEG.K04G7.3	CTROP.Csp11.Scaffold36.g155
OG0005455	CKAMA.g10242	CBRIG.CBG02742	CELEG.T09F3.2	CTROP.Csp11.Scaffold629.g7895
OG0005456	CKAMA.g10243	CBRIG.CBG05462	CELEG.Y73B6BL.33	CTROP.Csp11.Scaffold335.g831
OG0005457	CKAMA.g10244	CBRIG.CBG05463	CELEG.Y73B6BL.18	CTROP.Csp11.Scaffold335.g832
OG0005458	CKAMA.g10249	CBRIG.CBG05468	CELEG.Y73B6BL.30	CTROP.Csp11.Scaffold335.g837
OG0005459	CKAMA.g10250	CBRIG.CBG05469	CELEG.Y73B6BL.5	CTROP.Csp11.Scaffold335.g838
OG0005460	CKAMA.g10251	CBRIG.CBG05470	CELEG.Y73B6BL.32	CTROP.Csp11.Scaffold335.g839
OG0005461	CKAMA.g10252	CBRIG.CBG05472	CELEG.Y73B6BL.29	CTROP.Csp11.Scaffold335.g841
OG0005463	CKAMA.g10258	CBRIG.CBG05491	CELEG.F58F9.7	CTROP.Csp11.Scaffold630.g17367
OG0005464	CKAMA.g10261	CBRIG.CBG05505	CELEG.C11D2.2	CTROP.Csp11.Scaffold630.g17353
OG0005465	CKAMA.g10263	CBRIG.CBG06252	CELEG.F35G2.4	CTROP.Csp11.Scaffold629.g12750
OG0005466	CKAMA.g10265	CBRIG.CBG06255	CELEG.Y39C12A.1	CTROP.Csp11.Scaffold629.g12746
OG0005467	CKAMA.g10267	CBRIG.CBG06260	CELEG.C42C1.1	CTROP.Csp11.Scaffold629.g12742
OG0005468	CKAMA.g10268	CBRIG.CBG06262	CELEG.C42C1.2	CTROP.Csp11.Scaffold629.g12741
OG0005469	CKAMA.g10269	CBRIG.CBG06263	CELEG.C42C1.14	CTROP.Csp11.Scaffold629.g12740
OG0005470	CKAMA.g10270	CBRIG.CBG06265	CELEG.C42C1.4	CTROP.Csp11.Scaffold629.g12739
OG0005471	CKAMA.g10271	CBRIG.CBG06267	CELEG.C42C1.13	CTROP.Csp11.Scaffold629.g12737
OG0005472	CKAMA.g10272	CBRIG.CBG06268	CELEG.C42C1.11	CTROP.Csp11.Scaffold629.g12736
OG0005473	CKAMA.g10273	CBRIG.CBG06269	CELEG.C42C1.12	CTROP.Csp11.Scaffold629.g12735
OG0005474	CKAMA.g10274	CBRIG.CBG06270	CELEG.C42C1.10	CTROP.Csp11.Scaffold629.g12734
OG0005475	CKAMA.g10275	CBRIG.CBG06271	CELEG.C42C1.15	CTROP.Csp11.Scaffold629.g12732
OG0005476	CKAMA.g10279	CBRIG.CBG03313	CELEG.F19B6.2	CTROP.Csp11.Scaffold629.g12713
OG0005477	CKAMA.g10280	CBRIG.CBG03314	CELEG.F19B6.1	CTROP.Csp11.Scaffold629.g12712
OG0005479	CKAMA.g10282	CBRIG.CBG23028	CELEG.C45G9.2	CTROP.Csp11.Scaffold629.g14494
OG0005480	CKAMA.g10283	CBRIG.CBG23026	CELEG.C45G9.11	CTROP.Csp11.Scaffold629.g14495
OG0005481	CKAMA.g10286	CBRIG.CBG03553	CELEG.F54D8.1	CTROP.Csp11.Scaffold629.g12375
OG0005482	CKAMA.g10287	CBRIG.CBG03554	CELEG.F54D8.6	CTROP.Csp11.Scaffold629.g12377
OG0005483	CKAMA.g16759	CBRIG.CBG12014	CELEG.F53F10.2	CTROP.Csp11.Scaffold627.g6735
OG0005484	CKAMA.g1988	CBRIG.CBG08713	CELEG.T26E3.3	CTROP.Csp11.Scaffold574.g4335
OG0005485	CKAMA.g1989	CBRIG.CBG08712	CELEG.T26E3.2	CTROP.Csp11.Scaffold574.g4334
OG0005486	CKAMA.g1992	CBRIG.CBG03330	CELEG.F08G5.1	CTROP.Csp11.Scaffold629.g12692
OG0005487	CKAMA.g1995	CBRIG.CBG13606	CELEG.Y71A12B.9	CTROP.Csp11.Scaffold525.g3055
OG0005488	CKAMA.g1996	CBRIG.CBG13605	CELEG.Y71A12B.1	CTROP.Csp11.Scaffold525.g3056
OG0005489	CKAMA.g1997	CBRIG.CBG13604	CELEG.W02A11.4	CTROP.Csp11.Scaffold525.g3057
OG0005490	CKAMA.g1998	CBRIG.CBG13603	CELEG.W02A11.3	CTROP.Csp11.Scaffold574.g4421
OG0005491	CKAMA.g1999	CBRIG.CBG13601	CELEG.W02A11.1	CTROP.Csp11.Scaffold574.g4419
OG0005492	CKAMA.g2000	CBRIG.CBG13600	CELEG.T06G6.9	CTROP.Csp11.Scaffold574.g4418
OG0005493	CKAMA.g2001	CBRIG.CBG13599	CELEG.T06G6.12	CTROP.Csp11.Scaffold574.g4417
OG0005494	CKAMA.g2004	CBRIG.CBG13613	CELEG.W04A4.6	CTROP.Csp11.Scaffold574.g4412
OG0005496	CKAMA.g2007	CBRIG.CBG13617	CELEG.Y71A12B.4	CTROP.Csp11.Scaffold574.g4408
OG0005497	CKAMA.g2009	CBRIG.CBG13623	CELEG.W09G3.1	CTROP.Csp11.Scaffold574.g4399
OG0005498	CKAMA.g2010	CBRIG.CBG13624	CELEG.W09G3.6	CTROP.Csp11.Scaffold574.g4398
OG0005499	CKAMA.g2012	CBRIG.CBG13635	CELEG.Y6B3B.10	CTROP.Csp11.Scaffold525.g3053
OG0005500	CKAMA.g2013	CBRIG.CBG13636	CELEG.Y6B3B.9	CTROP.Csp11.Scaffold525.g3052
OG0005501	CKAMA.g2014	CBRIG.CBG13637	CELEG.Y6B3B.7	CTROP.Csp11.Scaffold525.g3051
OG0005502	CKAMA.g2017	CBRIG.CBG13640	CELEG.Y6B3B.4	CTROP.Csp11.Scaffold525.g3049
OG0005503	CKAMA.g2018	CBRIG.CBG13644	CELEG.Y37H9A.3	CTROP.Csp11.Scaffold525.g3047
OG0005504	CKAMA.g2020	CBRIG.CBG29109	CELEG.W09G3.7	CTROP.Csp11.Scaffold525.g3045
OG0005505	CKAMA.g2021	CBRIG.CBG15823	CELEG.Y6B3B.11	CTROP.Csp11.Scaffold525.g3044
OG0005506	CKAMA.g2022	CBRIG.CBG29896	CELEG.W04A4.3	CTROP.Csp11.Scaffold525.g3036
OG0005507	CKAMA.g2025	CBRIG.CBG18787	CELEG.K04H8.3	CTROP.Csp11.Scaffold525.g3031
OG0005508	CKAMA.g2026	CBRIG.CBG18783	CELEG.F09C3.2	CTROP.Csp11.Scaffold525.g3033
OG0005509	CKAMA.g2028	CBRIG.CBG18791	CELEG.C49A1.10	CTROP.Csp11.Scaffold525.g3029
OG0005510	CKAMA.g10296	CBRIG.CBG05561	CELEG.F31D4.7	CTROP.Csp11.Scaffold630.g21790
OG0005511	CKAMA.g10297	CBRIG.CBG05562	CELEG.F31D4.6	CTROP.Csp11.Scaffold630.g21791
OG0005512	CKAMA.g10298	CBRIG.CBG05563	CELEG.F31D4.5	CTROP.Csp11.Scaffold630.g21792
OG0005513	CKAMA.g10300	CBRIG.CBG04454	CELEG.F31D4.3	CTROP.Csp11.Scaffold630.g21800
OG0005514	CKAMA.g10301	CBRIG.CBG04453	CELEG.F31D4.2	CTROP.Csp11.Scaffold630.g21799
OG0005515	CKAMA.g10302	CBRIG.CBG05571	CELEG.T03D8.1	CTROP.Csp11.Scaffold630.g21796
OG0005516	CKAMA.g10303	CBRIG.CBG05570	CELEG.T03D8.3	CTROP.Csp11.Scaffold630.g21795
OG0005517	CKAMA.g10304	CBRIG.CBG05569	CELEG.T03D8.4	CTROP.Csp11.Scaffold630.g21794
OG0005518	CKAMA.g10305	CBRIG.CBG05567	CELEG.T03D8.5	CTROP.Csp11.Scaffold630.g21801
OG0005519	CKAMA.g10306	CBRIG.CBG05566	CELEG.T03D8.6	CTROP.Csp11.Scaffold630.g21802
OG0005520	CKAMA.g10307	CBRIG.CBG05542	CELEG.F38A6.4	CTROP.Csp11.Scaffold630.g21810
OG0005521	CKAMA.g10308	CBRIG.CBG05540	CELEG.F38A6.3	CTROP.Csp11.Scaffold630.g21811
OG0005522	CKAMA.g10309	CBRIG.CBG05538	CELEG.Y44A6D.3	CTROP.Csp11.Scaffold630.g21813
OG0005523	CKAMA.g10310	CBRIG.CBG05635	CELEG.C14B4.2	CTROP.Csp11.Scaffold629.g14630
OG0005524	CKAMA.g10311	CBRIG.CBG05620	CELEG.Y38H6A.3	CTROP.Csp11.Scaffold629.g14637
OG0005525	CKAMA.g10313	CBRIG.CBG05619	CELEG.Y38H6A.1	CTROP.Csp11.Scaffold629.g14638
OG0005526	CKAMA.g16772	CBRIG.CBG19744	CELEG.K05C4.5	CTROP.Csp11.Scaffold630.g19006
OG0005527	CKAMA.g16775	CBRIG.CBG13538	CELEG.T07A9.12	CTROP.Csp11.Scaffold629.g10699
OG0005528	CKAMA.g10315	CBRIG.CBG12008	CELEG.C32E8.10	CTROP.Csp11.Scaffold627.g6740
OG0005529	CKAMA.g16781	CBRIG.CBG02803	CELEG.F18A11.5	CTROP.Csp11.Scaffold629.g7863
OG0005530	CKAMA.g10317	CBRIG.CBG21460	CELEG.F54A3.3	CTROP.Csp11.Scaffold517.g2720
OG0005531	CKAMA.g10319	CBRIG.CBG08497	CELEG.Y48G8AR.2	CTROP.Csp11.Scaffold629.g16063
OG0005532	CKAMA.g10323	CBRIG.CBG08468	CELEG.C35E7.2	CTROP.Csp11.Scaffold630.g20632
OG0005533	CKAMA.g10329	CBRIG.CBG25584	CELEG.W02B12.13	CTROP.Csp11.Scaffold554.g3717
OG0005534	CKAMA.g16796	CBRIG.CBG06218	CELEG.K08E4.2	CTROP.Csp11.Scaffold629.g11853
OG0005535	CKAMA.g16797	CBRIG.CBG04334	CELEG.K02F6.9	CTROP.Csp11.Scaffold630.g16976
OG0005537	CKAMA.g16801	CBRIG.CBG05913	CELEG.F32E10.8	CTROP.Csp11.Scaffold630.g21207
OG0005538	CKAMA.g16805	CBRIG.CBG04712	CELEG.F40G12.4	CTROP.Csp11.Scaffold630.g19951
OG0005539	CKAMA.g10333	CBRIG.CBG16594	CELEG.B0280.8	CTROP.Csp11.Scaffold36.g162
OG0005540	CKAMA.g10335	CBRIG.CBG16593	CELEG.B0280.7	CTROP.Csp11.Scaffold36.g161
OG0005541	CKAMA.g16807	CBRIG.CBG03981	CELEG.Y39G10AR.2	CTROP.Csp11.Scaffold630.g17124
OG0005542	CKAMA.g16808	CBRIG.CBG03977	CELEG.Y39G10AR.3	CTROP.Csp11.Scaffold630.g17120
OG0005543	CKAMA.g10350	CBRIG.CBG18067	CELEG.R07E5.10	CTROP.Csp11.Scaffold8.g28
OG0005544	CKAMA.g10351	CBRIG.CBG30313	CELEG.R07E5.19	CTROP.Csp11.Scaffold8.g29
OG0005545	CKAMA.g10352	CBRIG.CBG18066	CELEG.R07E5.7	CTROP.Csp11.Scaffold8.g30
OG0005546	CKAMA.g10353	CBRIG.CBG18065	CELEG.R07E5.8	CTROP.Csp11.Scaffold8.g31
OG0005547	CKAMA.g10360	CBRIG.CBG15314	CELEG.Y76A2B.6	CTROP.Csp11.Scaffold630.g18527
OG0005548	CKAMA.g10361	CBRIG.CBG15313	CELEG.Y76A2B.5	CTROP.Csp11.Scaffold630.g18528
OG0005549	CKAMA.g10362	CBRIG.CBG15311	CELEG.Y76A2B.3	CTROP.Csp11.Scaffold630.g18517
OG0005550	CKAMA.g10363	CBRIG.CBG18063	CELEG.C28A5.3	CTROP.Csp11.Scaffold8.g33
OG0005551	CKAMA.g10364	CBRIG.CBG09139	CELEG.T20B12.1	CTROP.Csp11.Scaffold629.g12607
OG0005552	CKAMA.g10365	CBRIG.CBG09137	CELEG.T20B12.3	CTROP.Csp11.Scaffold629.g12609
OG0005553	CKAMA.g10367	CBRIG.CBG09135	CELEG.T20B12.7	CTROP.Csp11.Scaffold629.g12611
OG0005554	CKAMA.g10368	CBRIG.CBG09134	CELEG.T20B12.6	CTROP.Csp11.Scaffold629.g12612
OG0005555	CKAMA.g10370	CBRIG.CBG09150	CELEG.R13A5.10	CTROP.Csp11.Scaffold630.g19567
OG0005556	CKAMA.g10371	CBRIG.CBG09151	CELEG.R13A5.9	CTROP.Csp11.Scaffold630.g19572
OG0005557	CKAMA.g10372	CBRIG.CBG09152	CELEG.R13A5.12	CTROP.Csp11.Scaffold630.g19571
OG0005558	CKAMA.g10373	CBRIG.CBG09153	CELEG.R13A5.8	CTROP.Csp11.Scaffold630.g19570
OG0005559	CKAMA.g10395	CBRIG.CBG02826	CELEG.Y48B6A.6	CTROP.Csp11.Scaffold629.g9745
OG0005560	CKAMA.g16834	CBRIG.CBG05700	CELEG.C17H12.9	CTROP.Csp11.Scaffold629.g13911
OG0005561	CKAMA.g10401	CBRIG.CBG09350	CELEG.C14C11.3	CTROP.Csp11.Scaffold536.g3307
OG0005562	CKAMA.g10405	CBRIG.CBG09346	CELEG.C14C11.8	CTROP.Csp11.Scaffold536.g3304
OG0005563	CKAMA.g10406	CBRIG.CBG09345	CELEG.F25B4.5	CTROP.Csp11.Scaffold536.g3294
OG0005564	CKAMA.g10407	CBRIG.CBG09343	CELEG.F25B4.4	CTROP.Csp11.Scaffold536.g3295
OG0005565	CKAMA.g10408	CBRIG.CBG09342	CELEG.F25B4.7	CTROP.Csp11.Scaffold536.g3296
OG0005566	CKAMA.g10410	CBRIG.CBG09340	CELEG.F25B4.9	CTROP.Csp11.Scaffold536.g3297
OG0005567	CKAMA.g10411	CBRIG.CBG09337	CELEG.F25B4.2	CTROP.Csp11.Scaffold536.g3298
OG0005568	CKAMA.g10415	CBRIG.CBG09330	CELEG.K09H11.6	CTROP.Csp11.Scaffold536.g3301
OG0005569	CKAMA.g10416	CBRIG.CBG09328	CELEG.K09H11.1	CTROP.Csp11.Scaffold536.g3302
OG0005570	CKAMA.g16842	CBRIG.CBG18122	CELEG.F42H10.7	CTROP.Csp11.Scaffold571.g4258
OG0005571	CKAMA.g16847	CBRIG.CBG00031	CELEG.ZK686.3	CTROP.Csp11.Scaffold630.g17230
OG0005572	CKAMA.g10422	CBRIG.CBG07576	CELEG.F40E10.6	CTROP.Csp11.Scaffold629.g10048
OG0005573	CKAMA.g10423	CBRIG.CBG07574	CELEG.F40E10.5	CTROP.Csp11.Scaffold629.g10049
OG0005574	CKAMA.g10424	CBRIG.CBG07573	CELEG.F40E10.1	CTROP.Csp11.Scaffold629.g10050
OG0005575	CKAMA.g10425	CBRIG.CBG07571	CELEG.F40E10.3	CTROP.Csp11.Scaffold629.g10052
OG0005576	CKAMA.g10426	CBRIG.CBG07570	CELEG.F40E10.4	CTROP.Csp11.Scaffold629.g10053
OG0005577	CKAMA.g10427	CBRIG.CBG07568	CELEG.C26G2.1	CTROP.Csp11.Scaffold629.g10056
OG0005578	CKAMA.g10428	CBRIG.CBG07566	CELEG.F54E4.4	CTROP.Csp11.Scaffold629.g10057
OG0005579	CKAMA.g10429	CBRIG.CBG07564	CELEG.F54E4.3	CTROP.Csp11.Scaffold629.g10058
OG0005580	CKAMA.g10430	CBRIG.CBG07563	CELEG.F54E4.2	CTROP.Csp11.Scaffold629.g10059
OG0005581	CKAMA.g10431	CBRIG.CBG07562	CELEG.F54E4.1	CTROP.Csp11.Scaffold629.g10060
OG0005582	CKAMA.g10442	CBRIG.CBG07783	CELEG.C49F8.15	CTROP.Csp11.Scaffold629.g11109
OG0005583	CKAMA.g10451	CBRIG.CBG07416	CELEG.F54B11.3	CTROP.Csp11.Scaffold630.g22061
OG0005584	CKAMA.g10453	CBRIG.CBG07411	CELEG.F54B11.5	CTROP.Csp11.Scaffold630.g22057
OG0005585	CKAMA.g10461	CBRIG.CBG07405	CELEG.Y12A6A.2	CTROP.Csp11.Scaffold630.g22053
OG0005586	CKAMA.g10462	CBRIG.CBG07404	CELEG.Y12A6A.1	CTROP.Csp11.Scaffold630.g22052
OG0005587	CKAMA.g10463	CBRIG.CBG07402	CELEG.C40C9.5	CTROP.Csp11.Scaffold630.g22051
OG0005588	CKAMA.g10465	CBRIG.CBG07400	CELEG.C40C9.2	CTROP.Csp11.Scaffold630.g22049
OG0005589	CKAMA.g10467	CBRIG.CBG07396	CELEG.C04A11.1	CTROP.Csp11.Scaffold630.g22048
OG0005591	CKAMA.g10513	CBRIG.CBG13906	CELEG.Y54G2A.41	CTROP.Csp11.Scaffold630.g18962
OG0005592	CKAMA.g10515	CBRIG.CBG19878	CELEG.C55C3.5	CTROP.Csp11.Scaffold510.g2536
OG0005593	CKAMA.g10516	CBRIG.CBG19877	CELEG.C55C3.1	CTROP.Csp11.Scaffold510.g2537
OG0005595	CKAMA.g16864	CBRIG.CBG05624	CELEG.F53F8.1	CTROP.Csp11.Scaffold630.g21824
OG0005596	CKAMA.g10525	CBRIG.CBG11983	CELEG.T28F2.7	CTROP.Csp11.Scaffold627.g6766
OG0005597	CKAMA.g10532	CBRIG.CBG20009	CELEG.C33A12.7	CTROP.Csp11.Scaffold629.g8209
OG0005598	CKAMA.g10533	CBRIG.CBG20014	CELEG.C33A12.3	CTROP.Csp11.Scaffold629.g8211
OG0005599	CKAMA.g16877	CBRIG.CBG11979	CELEG.C50F2.3	CTROP.Csp11.Scaffold627.g6769
OG0005601	CKAMA.g16887	CBRIG.CBG06459	CELEG.C31B8.8	CTROP.Csp11.Scaffold630.g21705
OG0005602	CKAMA.g10544	CBRIG.CBG15978	CELEG.C30G4.3	CTROP.Csp11.Scaffold629.g13520
OG0005603	CKAMA.g10549	CBRIG.CBG15976	CELEG.F35B3.7	CTROP.Csp11.Scaffold629.g13522
OG0005604	CKAMA.g10551	CBRIG.CBG15975	CELEG.F35B3.5	CTROP.Csp11.Scaffold629.g13523
OG0005605	CKAMA.g10552	CBRIG.CBG15974	CELEG.F35B3.4	CTROP.Csp11.Scaffold629.g13524
OG0005606	CKAMA.g10555	CBRIG.CBG15968	CELEG.K02H8.1	CTROP.Csp11.Scaffold629.g13527
OG0005607	CKAMA.g10556	CBRIG.CBG15963	CELEG.F52G3.5	CTROP.Csp11.Scaffold629.g13528
OG0005608	CKAMA.g10557	CBRIG.CBG15962	CELEG.F52G3.1	CTROP.Csp11.Scaffold629.g13529
OG0005609	CKAMA.g10564	CBRIG.CBG19420	CELEG.T07C12.11	CTROP.Csp11.Scaffold629.g15793
OG0005610	CKAMA.g10565	CBRIG.CBG19421	CELEG.C27H6.1	CTROP.Csp11.Scaffold629.g15792
OG0005611	CKAMA.g10566	CBRIG.CBG19422	CELEG.C27H6.2	CTROP.Csp11.Scaffold629.g15791
OG0005612	CKAMA.g10567	CBRIG.CBG19423	CELEG.C27H6.3	CTROP.Csp11.Scaffold629.g15790
OG0005613	CKAMA.g10568	CBRIG.CBG30600	CELEG.C27H6.9	CTROP.Csp11.Scaffold629.g15794
OG0005614	CKAMA.g10570	CBRIG.CBG19425	CELEG.C27H6.8	CTROP.Csp11.Scaffold629.g15796
OG0005615	CKAMA.g10571	CBRIG.CBG19426	CELEG.K08H10.7	CTROP.Csp11.Scaffold629.g15798
OG0005616	CKAMA.g10572	CBRIG.CBG19427	CELEG.K08H10.9	CTROP.Csp11.Scaffold629.g15799
OG0005617	CKAMA.g10573	CBRIG.CBG19428	CELEG.K08H10.6	CTROP.Csp11.Scaffold629.g15800
OG0005618	CKAMA.g10575	CBRIG.CBG11542	CELEG.K08H10.4	CTROP.Csp11.Scaffold629.g15805
OG0005619	CKAMA.g10577	CBRIG.CBG11549	CELEG.Y6E2A.4	CTROP.Csp11.Scaffold629.g15810
OG0005620	CKAMA.g10579	CBRIG.CBG11997	CELEG.ZK770.1	CTROP.Csp11.Scaffold627.g6749
OG0005621	CKAMA.g10581	CBRIG.CBG11995	CELEG.Y8G1A.2	CTROP.Csp11.Scaffold627.g6752
OG0005622	CKAMA.g2073	CBRIG.CBG10659	CELEG.T14C1.1	CTROP.Csp11.Scaffold628.g7088
OG0005623	CKAMA.g2074	CBRIG.CBG10653	CELEG.H23L24.3	CTROP.Csp11.Scaffold628.g7086
OG0005624	CKAMA.g2075	CBRIG.CBG10649	CELEG.K04G11.5	CTROP.Csp11.Scaffold628.g7085
OG0005625	CKAMA.g2086	CBRIG.CBG07259	CELEG.E02H4.1	CTROP.Csp11.Scaffold628.g7105
OG0005626	CKAMA.g2087	CBRIG.CBG07253	CELEG.E02H4.3	CTROP.Csp11.Scaffold628.g7103
OG0005627	CKAMA.g2089	CBRIG.CBG07248	CELEG.C11H1.3	CTROP.Csp11.Scaffold628.g7108
OG0005628	CKAMA.g2091	CBRIG.CBG07245	CELEG.C11H1.9	CTROP.Csp11.Scaffold628.g7110
OG0005629	CKAMA.g2093	CBRIG.CBG07243	CELEG.C11H1.7	CTROP.Csp11.Scaffold628.g7112
OG0005630	CKAMA.g2094	CBRIG.CBG07242	CELEG.K04G11.2	CTROP.Csp11.Scaffold628.g7113
OG0005631	CKAMA.g2095	CBRIG.CBG10596	CELEG.E02H4.4	CTROP.Csp11.Scaffold628.g7114
OG0005632	CKAMA.g2101	CBRIG.CBG16312	CELEG.C37E2.5	CTROP.Csp11.Scaffold628.g7100
OG0005633	CKAMA.g2102	CBRIG.CBG16311	CELEG.C37E2.4	CTROP.Csp11.Scaffold628.g7099
OG0005634	CKAMA.g2104	CBRIG.CBG16309	CELEG.C37E2.1	CTROP.Csp11.Scaffold628.g7097
OG0005635	CKAMA.g2105	CBRIG.CBG16308	CELEG.R03E1.1	CTROP.Csp11.Scaffold628.g7096
OG0005638	CKAMA.g10586	CBRIG.CBG15006	CELEG.H27C11.1	CTROP.Csp11.Scaffold630.g20332
OG0005639	CKAMA.g10587	CBRIG.CBG15000	CELEG.C28D4.2	CTROP.Csp11.Scaffold630.g20229
OG0005640	CKAMA.g10589	CBRIG.CBG14996	CELEG.C28D4.9	CTROP.Csp11.Scaffold629.g12362
OG0005641	CKAMA.g10590	CBRIG.CBG22596	CELEG.K01H12.3	CTROP.Csp11.Scaffold630.g20254
OG0005642	CKAMA.g10591	CBRIG.CBG22587	CELEG.F58G6.5	CTROP.Csp11.Scaffold630.g20260
OG0005643	CKAMA.g16899	CBRIG.CBG16639	CELEG.F10E9.4	CTROP.Csp11.Scaffold561.g3906
OG0005644	CKAMA.g10598	CBRIG.CBG13928	CELEG.Y77E11A.2	CTROP.Csp11.Scaffold588.g4936
OG0005645	CKAMA.g2140	CBRIG.CBG15803	CELEG.F11A6.1	CTROP.Csp11.Scaffold630.g19702
OG0005646	CKAMA.g10615	CBRIG.CBG26996	CELEG.R02C2.4	CTROP.Csp11.Scaffold513.g2604
OG0005647	CKAMA.g10622	CBRIG.CBG01072	CELEG.Y58G8A.4	CTROP.Csp11.Scaffold559.g3879
OG0005648	CKAMA.g10624	CBRIG.CBG12107	CELEG.F33E11.3	CTROP.Csp11.Scaffold559.g3875
OG0005649	CKAMA.g10634	CBRIG.CBG05291	CELEG.F17A2.13	CTROP.Csp11.Scaffold629.g10109
OG0005650	CKAMA.g16928	CBRIG.CBG05609	CELEG.F26F2.7	CTROP.Csp11.Scaffold630.g21827
OG0005651	CKAMA.g16929	CBRIG.CBG07035	CELEG.T03F6.1	CTROP.Csp11.Scaffold605.g5633
OG0005652	CKAMA.g10658	CBRIG.CBG13502	CELEG.T21D12.7	CTROP.Csp11.Scaffold629.g10677
OG0005653	CKAMA.g10662	CBRIG.CBG13497	CELEG.Y66H1A.2	CTROP.Csp11.Scaffold629.g10684
OG0005654	CKAMA.g10663	CBRIG.CBG13496	CELEG.Y66H1A.3	CTROP.Csp11.Scaffold629.g10685
OG0005655	CKAMA.g16937	CBRIG.CBG30472	CELEG.F52C12.6	CTROP.Csp11.Scaffold629.g10733
OG0005656	CKAMA.g2143	CBRIG.CBG10533	CELEG.Y69A2AR.15	CTROP.Csp11.Scaffold630.g18979
OG0005657	CKAMA.g16944	CBRIG.CBG30438	CELEG.Y76B12C.6	CTROP.Csp11.Scaffold629.g10750
OG0005659	CKAMA.g10690	CBRIG.CBG18506	CELEG.C28C12.13	CTROP.Csp11.Scaffold630.g20583
OG0005661	CKAMA.g16961	CBRIG.CBG12061	CELEG.E01A2.1	CTROP.Csp11.Scaffold627.g6696
OG0005662	CKAMA.g16964	CBRIG.CBG31359	CELEG.B0334.15	CTROP.Csp11.Scaffold554.g3697
OG0005663	CKAMA.g10701	CBRIG.CBG03505	CELEG.F42A9.1	CTROP.Csp11.Scaffold629.g12174
OG0005664	CKAMA.g10703	CBRIG.CBG03519	CELEG.F42A9.2	CTROP.Csp11.Scaffold629.g12175
OG0005665	CKAMA.g10704	CBRIG.CBG03520	CELEG.F42A9.8	CTROP.Csp11.Scaffold629.g12178
OG0005666	CKAMA.g10705	CBRIG.CBG30376	CELEG.F42A9.3	CTROP.Csp11.Scaffold629.g12177
OG0005667	CKAMA.g10706	CBRIG.CBG26498	CELEG.F42A9.7	CTROP.Csp11.Scaffold629.g12176
OG0005669	CKAMA.g10709	CBRIG.CBG19389	CELEG.R07B5.9	CTROP.Csp11.Scaffold629.g16204
OG0005670	CKAMA.g10711	CBRIG.CBG19391	CELEG.T11A5.7	CTROP.Csp11.Scaffold629.g16198
OG0005671	CKAMA.g10712	CBRIG.CBG19392	CELEG.T11A5.5	CTROP.Csp11.Scaffold629.g16197
OG0005672	CKAMA.g10717	CBRIG.CBG19400	CELEG.C50H2.2	CTROP.Csp11.Scaffold629.g16191
OG0005673	CKAMA.g10718	CBRIG.CBG19401	CELEG.C50H2.3	CTROP.Csp11.Scaffold629.g16189
OG0005674	CKAMA.g10721	CBRIG.CBG19409	CELEG.C50H2.13	CTROP.Csp11.Scaffold629.g16181
OG0005675	CKAMA.g10722	CBRIG.CBG19410	CELEG.T07C12.12	CTROP.Csp11.Scaffold629.g16178
OG0005676	CKAMA.g10723	CBRIG.CBG19411	CELEG.T07C12.14	CTROP.Csp11.Scaffold629.g16179
OG0005677	CKAMA.g10728	CBRIG.CBG19415	CELEG.T07C12.9	CTROP.Csp11.Scaffold629.g15779
OG0005678	CKAMA.g10731	CBRIG.CBG19417	CELEG.T07C12.10	CTROP.Csp11.Scaffold629.g15801
OG0005679	CKAMA.g16979	CBRIG.CBG22827	CELEG.F57G8.4	CTROP.Csp11.Scaffold630.g19329
OG0005680	CKAMA.g10734	CBRIG.CBG20056	CELEG.W09C2.1	CTROP.Csp11.Scaffold521.g2841
OG0005681	CKAMA.g16998	CBRIG.CBG03565	CELEG.Y111B2A.24	CTROP.Csp11.Scaffold630.g17155
OG0005682	CKAMA.g10735	CBRIG.CBG24731	CELEG.F53A2.9	CTROP.Csp11.Scaffold629.g14561
OG0005683	CKAMA.g10739	CBRIG.CBG24280	CELEG.F53A2.5	CTROP.Csp11.Scaffold629.g14565
OG0005684	CKAMA.g10740	CBRIG.CBG24281	CELEG.F53A2.4	CTROP.Csp11.Scaffold629.g14564
OG0005685	CKAMA.g17006	CBRIG.CBG13204	CELEG.Y47D3A.27	CTROP.Csp11.Scaffold630.g20775
OG0005686	CKAMA.g17028	CBRIG.CBG02764	CELEG.Y38F1A.2	CTROP.Csp11.Scaffold629.g7875
OG0005687	CKAMA.g10751	CBRIG.CBG18807	CELEG.C49A1.4	CTROP.Csp11.Scaffold525.g3026
OG0005688	CKAMA.g10754	CBRIG.CBG10810	CELEG.Y110A7A.20	CTROP.Csp11.Scaffold542.g3418
OG0005689	CKAMA.g10756	CBRIG.CBG18804	CELEG.C37A5.7	CTROP.Csp11.Scaffold525.g3020
OG0005690	CKAMA.g17030	CBRIG.CBG02772	CELEG.Y38F1A.8	CTROP.Csp11.Scaffold629.g7874
OG0005691	CKAMA.g17039	CBRIG.CBG06189	CELEG.VZK822L.2	CTROP.Csp11.Scaffold629.g15602
OG0005692	CKAMA.g10771	CBRIG.CBG18693	CELEG.R09B3.1	CTROP.Csp11.Scaffold629.g11841
OG0005693	CKAMA.g10773	CBRIG.CBG18690	CELEG.R09B3.5	CTROP.Csp11.Scaffold629.g11838
OG0005694	CKAMA.g10775	CBRIG.CBG18687	CELEG.R06C1.3	CTROP.Csp11.Scaffold629.g11835
OG0005695	CKAMA.g10777	CBRIG.CBG13650	CELEG.Y53C10A.5	CTROP.Csp11.Scaffold629.g11819
OG0005696	CKAMA.g10778	CBRIG.CBG13649	CELEG.Y53C10A.4	CTROP.Csp11.Scaffold629.g11811
OG0005697	CKAMA.g10779	CBRIG.CBG18699	CELEG.Y53C10A.12	CTROP.Csp11.Scaffold629.g11812
OG0005698	CKAMA.g10780	CBRIG.CBG18698	CELEG.R06C1.6	CTROP.Csp11.Scaffold629.g11813
OG0005699	CKAMA.g10783	CBRIG.CBG20321	CELEG.Y80D3A.10	CTROP.Csp11.Scaffold520.g2819
OG0005701	CKAMA.g10799	CBRIG.CBG15340	CELEG.B0303.9	CTROP.Csp11.Scaffold629.g9831
OG0005702	CKAMA.g10802	CBRIG.CBG15342	CELEG.B0303.16	CTROP.Csp11.Scaffold629.g9843
OG0005703	CKAMA.g10803	CBRIG.CBG15341	CELEG.B0303.11	CTROP.Csp11.Scaffold629.g9844
OG0005704	CKAMA.g10804	CBRIG.CBG15344	CELEG.B0303.15	CTROP.Csp11.Scaffold629.g9851
OG0005705	CKAMA.g10806	CBRIG.CBG06931	CELEG.ZK370.4	CTROP.Csp11.Scaffold629.g9869
OG0005707	CKAMA.g10810	CBRIG.CBG06929	CELEG.ZK370.5	CTROP.Csp11.Scaffold629.g9874
OG0005708	CKAMA.g10811	CBRIG.CBG06927	CELEG.ZK370.6	CTROP.Csp11.Scaffold629.g9866
OG0005709	CKAMA.g10812	CBRIG.CBG06926	CELEG.ZK370.7	CTROP.Csp11.Scaffold629.g9910
OG0005710	CKAMA.g10814	CBRIG.CBG06925	CELEG.ZK370.8	CTROP.Csp11.Scaffold629.g9908
OG0005711	CKAMA.g10816	CBRIG.CBG06922	CELEG.ZK370.2	CTROP.Csp11.Scaffold629.g9905
OG0005712	CKAMA.g10817	CBRIG.CBG06916	CELEG.PAR2.3	CTROP.Csp11.Scaffold630.g19615
OG0005713	CKAMA.g10818	CBRIG.CBG06915	CELEG.PAR2.4	CTROP.Csp11.Scaffold630.g19611
OG0005714	CKAMA.g10819	CBRIG.CBG06914	CELEG.PAR2.1	CTROP.Csp11.Scaffold630.g19610
OG0005715	CKAMA.g10825	CBRIG.CBG09608	CELEG.Y32F6A.1	CTROP.Csp11.Scaffold502.g2352
OG0005716	CKAMA.g10826	CBRIG.CBG09610	CELEG.Y32F6A.4	CTROP.Csp11.Scaffold502.g2351
OG0005717	CKAMA.g10827	CBRIG.CBG30668	CELEG.F15H10.4	CTROP.Csp11.Scaffold502.g2350
OG0005719	CKAMA.g10831	CBRIG.CBG09618	CELEG.F15H10.7	CTROP.Csp11.Scaffold502.g2348
OG0005720	CKAMA.g10833	CBRIG.CBG23151	CELEG.AC3.6	CTROP.Csp11.Scaffold502.g2340
OG0005721	CKAMA.g10839	CBRIG.CBG09621	CELEG.AC3.5	CTROP.Csp11.Scaffold502.g2342
OG0005722	CKAMA.g10840	CBRIG.CBG09622	CELEG.AC3.10	CTROP.Csp11.Scaffold502.g2335
OG0005723	CKAMA.g10841	CBRIG.CBG09661	CELEG.C32C4.1	CTROP.Csp11.Scaffold629.g15506
OG0005724	CKAMA.g10843	CBRIG.CBG09664	CELEG.C32C4.2	CTROP.Csp11.Scaffold629.g15541
OG0005725	CKAMA.g10845	CBRIG.CBG09667	CELEG.F29F11.3	CTROP.Csp11.Scaffold629.g15539
OG0005726	CKAMA.g10848	CBRIG.CBG09671	CELEG.F29F11.5	CTROP.Csp11.Scaffold629.g15535
OG0005727	CKAMA.g10850	CBRIG.CBG09678	CELEG.C05A2.1	CTROP.Csp11.Scaffold629.g15546
OG0005728	CKAMA.g10851	CBRIG.CBG09680	CELEG.T28B11.1	CTROP.Csp11.Scaffold629.g15547
OG0005729	CKAMA.g10854	CBRIG.CBG09687	CELEG.ZC302.1	CTROP.Csp11.Scaffold629.g15552
OG0005730	CKAMA.g10856	CBRIG.CBG09689	CELEG.ZC302.3	CTROP.Csp11.Scaffold629.g15550
OG0005731	CKAMA.g17065	CBRIG.CBG03974	CELEG.W09C3.8	CTROP.Csp11.Scaffold629.g8442
OG0005732	CKAMA.g17066	CBRIG.CBG03865	CELEG.W09C3.7	CTROP.Csp11.Scaffold630.g17118
OG0005733	CKAMA.g17069	CBRIG.CBG02934	CELEG.C47G2.4	CTROP.Csp11.Scaffold45.g265
OG0005734	CKAMA.g17070	CBRIG.CBG19782	CELEG.Y87G2A.10	CTROP.Csp11.Scaffold630.g20990
OG0005735	CKAMA.g10865	CBRIG.CBG15471	CELEG.C06E2.5	CTROP.Csp11.Scaffold629.g8632
OG0005736	CKAMA.g10868	CBRIG.CBG15472	CELEG.C06E2.7	CTROP.Csp11.Scaffold629.g8636
OG0005737	CKAMA.g10871	CBRIG.CBG00076	CELEG.F22E10.5	CTROP.Csp11.Scaffold630.g18814
OG0005738	CKAMA.g10872	CBRIG.CBG00075	CELEG.T22H6.1	CTROP.Csp11.Scaffold630.g18815
OG0005739	CKAMA.g10876	CBRIG.CBG00068	CELEG.T22H6.6	CTROP.Csp11.Scaffold630.g18820
OG0005740	CKAMA.g10877	CBRIG.CBG00062	CELEG.C52G5.2	CTROP.Csp11.Scaffold630.g18821
OG0005741	CKAMA.g10878	CBRIG.CBG00061	CELEG.C52G5.3	CTROP.Csp11.Scaffold630.g18822
OG0005742	CKAMA.g10884	CBRIG.CBG00091	CELEG.C02B4.1	CTROP.Csp11.Scaffold630.g18804
OG0005743	CKAMA.g10885	CBRIG.CBG00093	CELEG.C02B4.2	CTROP.Csp11.Scaffold630.g18802
OG0005744	CKAMA.g17086	CBRIG.CBG16566	CELEG.F37A4.1	CTROP.Csp11.Scaffold629.g14472
OG0005745	CKAMA.g17095	CBRIG.CBG20572	CELEG.ZK742.5	CTROP.Csp11.Scaffold630.g18318
[truncated: 5,588 more rows]

## Sheet: Expanded Single Copy Orthos
group	CKAMA	CBRIG	CELEG	CTROP
OG0000328	CKAMA.g8881	CBRIG.CBG15108	CELEG.Y48G9A.9	CTROP.Csp11.Scaffold575.g4447
OG0000370	CKAMA.g18439	CBRIG.CBG05753	CELEG.C06G3.1	CTROP.Csp11.Scaffold630.g21085
OG0000382	CKAMA.g5080	CBRIG.CBG18089	CELEG.B0285.1	CTROP.Csp11.Scaffold630.g21924
OG0000531	CKAMA.g15430	CBRIG.CBG19871	CELEG.T07D3.4	CTROP.Csp11.Scaffold510.g2544
OG0000588	CKAMA.g14722	CBRIG.CBG01857	CELEG.C36E6.2	CTROP.Csp11.Scaffold629.g13576
OG0000591	CKAMA.g6999	CBRIG.CBG17991	CELEG.B0393.3	CTROP.Csp11.Scaffold478.g1801
OG0000650	CKAMA.g7849	CBRIG.CBG15946	CELEG.T08G2.3	CTROP.Csp11.Scaffold629.g13546
OG0000763	CKAMA.g5631	CBRIG.CBG11484	CELEG.F53C11.3	CTROP.Csp11.Scaffold629.g14280
OG0000792	CKAMA.g9306	CBRIG.CBG23929	CELEG.ZK973.2	CTROP.Csp11.Scaffold456.g1359
OG0000825	CKAMA.g11285	CBRIG.CBG06190	CELEG.VZK822L.1	CTROP.Csp11.Scaffold629.g15603
OG0000828	CKAMA.g270	CBRIG.CBG11616	CELEG.Y50E8A.16	CTROP.Csp11.Scaffold629.g15902
OG0000880	CKAMA.g1076	CBRIG.CBG08646	CELEG.K11D12.4	CTROP.Csp11.Scaffold629.g13162
OG0000887	CKAMA.g6331	CBRIG.CBG15409	CELEG.F53A9.2	CTROP.Csp11.Scaffold629.g10963
OG0000940	CKAMA.g9611	CBRIG.CBG07704	CELEG.R03A10.4	CTROP.Csp11.Scaffold558.g3838
OG0000941	CKAMA.g15905	CBRIG.CBG08967	CELEG.C05D2.4	CTROP.Csp11.Scaffold626.g6373
OG0000951	CKAMA.g1278	CBRIG.CBG17303	CELEG.C35C5.3	CTROP.Csp11.Scaffold553.g3670
OG0000954	CKAMA.g10696	CBRIG.CBG18470	CELEG.T26A8.2	CTROP.Csp11.Scaffold630.g17242
OG0000991	CKAMA.g6965	CBRIG.CBG19615	CELEG.Y110A2AL.12	CTROP.Csp11.Scaffold629.g9210
OG0000995	CKAMA.g5989	CBRIG.CBG00627	CELEG.F22B5.3	CTROP.Csp11.Scaffold630.g21329
OG0001037	CKAMA.g2154	CBRIG.CBG04460	CELEG.F18E3.7	CTROP.Csp11.Scaffold629.g12002
OG0001040	CKAMA.g2277	CBRIG.CBG05922	CELEG.F45E4.3	CTROP.Csp11.Scaffold630.g21216
OG0001046	CKAMA.g211	CBRIG.CBG04652	CELEG.F47B8.2	CTROP.Csp11.Scaffold630.g19927
OG0001055	CKAMA.g11698	CBRIG.CBG15465	CELEG.C28G1.3	CTROP.Csp11.Scaffold629.g10928
OG0001067	CKAMA.g673	CBRIG.CBG29123	CELEG.F32D8.12	CTROP.Csp11.Scaffold629.g11243
OG0001073	CKAMA.g12484	CBRIG.CBG08581	CELEG.F18E2.1	CTROP.Csp11.Scaffold630.g21508
OG0001076	CKAMA.g12512	CBRIG.CBG15367	CELEG.K08C9.4	CTROP.Csp11.Scaffold630.g19161
OG0001120	CKAMA.g13212	CBRIG.CBG29952	CELEG.Y71F9AL.18	CTROP.Csp11.Scaffold627.g6887
OG0001127	CKAMA.g13394	CBRIG.CBG19814	CELEG.ZK909.2	CTROP.Csp11.Scaffold565.g4077
OG0001297	CKAMA.g7616	CBRIG.CBG03124	CELEG.F43G6.11	CTROP.Csp11.Scaffold458.g1404
OG0001299	CKAMA.g18261	CBRIG.CBG03363	CELEG.Y67D8C.5	CTROP.Csp11.Scaffold604.g5531
OG0001301	CKAMA.g9030	CBRIG.CBG02448	CELEG.C17G10.5	CTROP.Csp11.Scaffold629.g11368
OG0001302	CKAMA.g2217	CBRIG.CBG15207	CELEG.F42G9.5	CTROP.Csp11.Scaffold630.g16674
OG0001305	CKAMA.g9225	CBRIG.CBG01975	CELEG.W07E11.1	CTROP.Csp11.Scaffold629.g13665
OG0001308	CKAMA.g1529	CBRIG.CBG01103	CELEG.W07B8.5	CTROP.Csp11.Scaffold513.g2588
OG0001322	CKAMA.g18390	CBRIG.CBG08978	CELEG.F56D2.2	CTROP.Csp11.Scaffold626.g6359
OG0001325	CKAMA.g9698	CBRIG.CBG07016	CELEG.B0432.2	CTROP.Csp11.Scaffold605.g5615
OG0001333	CKAMA.g9985	CBRIG.CBG01624	CELEG.W08E12.2	CTROP.Csp11.Scaffold629.g7581
OG0001343	CKAMA.g2008	CBRIG.CBG13620	CELEG.W04A8.7	CTROP.Csp11.Scaffold574.g4405
OG0001356	CKAMA.g11468	CBRIG.CBG00168	CELEG.B0563.1	CTROP.Csp11.Scaffold630.g18742
OG0001368	CKAMA.g625	CBRIG.CBG06242	CELEG.B0001.6	CTROP.Csp11.Scaffold448.g1260
OG0001370	CKAMA.g2235	CBRIG.CBG15266	CELEG.T19C3.5	CTROP.Csp11.Scaffold630.g19671
OG0001401	CKAMA.g19037	CBRIG.CBG12888	CELEG.T09B4.8	CTROP.Csp11.Scaffold58.g359
OG0001406	CKAMA.g18603	CBRIG.CBG08323	CELEG.Y37E11AL.7	CTROP.Csp11.Scaffold629.g9297
OG0001410	CKAMA.g12367	CBRIG.CBG22181	CELEG.M04C9.3	CTROP.Csp11.Scaffold629.g15185
OG0001436	CKAMA.g2700	CBRIG.CBG04027	CELEG.C34G6.1	CTROP.Csp11.Scaffold630.g17086
OG0001469	CKAMA.g4178	CBRIG.CBG09961	CELEG.K11H3.6	CTROP.Csp11.Scaffold630.g17438
OG0001477	CKAMA.g4419	CBRIG.CBG21288	CELEG.C32H11.5	CTROP.Csp11.Scaffold629.g8849
OG0001479	CKAMA.g14602	CBRIG.CBG12517	CELEG.T01H8.2	CTROP.Csp11.Scaffold630.g20444
OG0001499	CKAMA.g5008	CBRIG.CBG02828	CELEG.Y48B6A.8	CTROP.Csp11.Scaffold629.g9755
OG0001520	CKAMA.g5933	CBRIG.CBG13035	CELEG.B0495.4	CTROP.Csp11.Scaffold469.g1615
OG0001529	CKAMA.g6190	CBRIG.CBG27084	CELEG.C08B6.4	CTROP.Csp11.Scaffold629.g10824
OG0001544	CKAMA.g15310	CBRIG.CBG03387	CELEG.F01G10.2	CTROP.Csp11.Scaffold585.g4764
OG0001545	CKAMA.g15314	CBRIG.CBG03392	CELEG.C24F3.4	CTROP.Csp11.Scaffold585.g4770
OG0001548	CKAMA.g7157	CBRIG.CBG09322	CELEG.F44E7.4	CTROP.Csp11.Scaffold536.g3283
OG0001663	CKAMA.g8000	CBRIG.CBG11120	CELEG.C34C6.4	CTROP.Csp11.Scaffold629.g15063
OG0001677	CKAMA.g1337	CBRIG.CBG17433	CELEG.R08B4.1	CTROP.Csp11.Scaffold515.g2657
OG0001684	CKAMA.g8198	CBRIG.CBG22170	CELEG.Y71G12B.10	CTROP.Csp11.Scaffold451.g1312
OG0001685	CKAMA.g8306	CBRIG.CBG22017	CELEG.Y48G1BR.1	CTROP.Csp11.Scaffold616.g6023
OG0001692	CKAMA.g10412	CBRIG.CBG09336	CELEG.F25B4.1	CTROP.Csp11.Scaffold536.g3299
OG0001701	CKAMA.g8507	CBRIG.CBG18748	CELEG.F02H6.5	CTROP.Csp11.Scaffold629.g14248
OG0001702	CKAMA.g8523	CBRIG.CBG21577	CELEG.LLC1.3	CTROP.Csp11.Scaffold630.g19633
OG0001711	CKAMA.g16122	CBRIG.CBG18455	CELEG.R11F4.1	CTROP.Csp11.Scaffold629.g13215
OG0001719	CKAMA.g11646	CBRIG.CBG19546	CELEG.K07E8.7	CTROP.Csp11.Scaffold629.g9987
OG0001737	CKAMA.g8	CBRIG.CBG08178	CELEG.R57.1	CTROP.Csp11.Scaffold549.g3587
OG0001740	CKAMA.g9145	CBRIG.CBG16248	CELEG.T01C8.5	CTROP.Csp11.Scaffold629.g13268
OG0001743	CKAMA.g9216	CBRIG.CBG01937	CELEG.ZC373.1	CTROP.Csp11.Scaffold629.g13655
OG0001756	CKAMA.g15149	CBRIG.CBG09180	CELEG.H14A12.2	CTROP.Csp11.Scaffold615.g5986
OG0001758	CKAMA.g9579	CBRIG.CBG07034	CELEG.T27A1.4	CTROP.Csp11.Scaffold605.g5634
OG0001763	CKAMA.g1605	CBRIG.CBG11879	CELEG.ZK524.3	CTROP.Csp11.Scaffold529.g3140
OG0001768	CKAMA.g9738	CBRIG.CBG21323	CELEG.T10F2.3	CTROP.Csp11.Scaffold629.g12523
OG0001786	CKAMA.g10047	CBRIG.CBG12345	CELEG.F39H11.2	CTROP.Csp11.Scaffold630.g20515
OG0001790	CKAMA.g1752	CBRIG.CBG20736	CELEG.C31C9.2	CTROP.Csp11.Scaffold586.g4887
OG0001795	CKAMA.g1923	CBRIG.CBG13100	CELEG.E04F6.9	CTROP.Csp11.Scaffold485.g1937
OG0001803	CKAMA.g10328	CBRIG.CBG02850	CELEG.F07A11.2	CTROP.Csp11.Scaffold60.g386
OG0001816	CKAMA.g2103	CBRIG.CBG16310	CELEG.C37E2.2	CTROP.Csp11.Scaffold628.g7098
OG0001820	CKAMA.g10737	CBRIG.CBG24278	CELEG.F53A2.7	CTROP.Csp11.Scaffold629.g14567
OG0001830	CKAMA.g7446	CBRIG.CBG19709	CELEG.F39B2.3	CTROP.Csp11.Scaffold565.g4064
OG0001843	CKAMA.g10981	CBRIG.CBG03046	CELEG.M28.8	CTROP.Csp11.Scaffold629.g8891
OG0001845	CKAMA.g11017	CBRIG.CBG23388	CELEG.C27A7.6	CTROP.Csp11.Scaffold629.g10371
OG0001849	CKAMA.g5695	CBRIG.CBG23963	CELEG.ZC155.4	CTROP.Csp11.Scaffold629.g12540
OG0001852	CKAMA.g2191	CBRIG.CBG15703	CELEG.K10F12.3	CTROP.Csp11.Scaffold630.g16720
OG0001853	CKAMA.g2193	CBRIG.CBG15224	CELEG.Y22D7AL.15	CTROP.Csp11.Scaffold630.g16768
OG0001875	CKAMA.g283	CBRIG.CBG04544	CELEG.H12D21.7	CTROP.Csp11.Scaffold629.g15881
OG0001877	CKAMA.g398	CBRIG.CBG03464	CELEG.F32B6.2	CTROP.Csp11.Scaffold585.g4843
OG0001880	CKAMA.g2473	CBRIG.CBG09581	CELEG.B0024.9	CTROP.Csp11.Scaffold516.g2708
OG0001888	CKAMA.g11593	CBRIG.CBG20910	CELEG.Y53F4B.39	CTROP.Csp11.Scaffold630.g17956
OG0001899	CKAMA.g17591	CBRIG.CBG02756	CELEG.F58G1.2	CTROP.Csp11.Scaffold629.g7883
OG0001902	CKAMA.g426	CBRIG.CBG21709	CELEG.C09G9.5	CTROP.Csp11.Scaffold629.g15224
OG0001903	CKAMA.g11740	CBRIG.CBG20109	CELEG.W03F8.3	CTROP.Csp11.Scaffold41.g213
OG0001910	CKAMA.g12466	CBRIG.CBG21737	CELEG.C53B4.7	CTROP.Csp11.Scaffold629.g10870
OG0001917	CKAMA.g18912	CBRIG.CBG02570	CELEG.R12C12.1	CTROP.Csp11.Scaffold629.g16433
OG0001921	CKAMA.g12294	CBRIG.CBG11992	CELEG.T12F5.2	CTROP.Csp11.Scaffold627.g6757
OG0001926	CKAMA.g12385	CBRIG.CBG12726	CELEG.F10D11.1	CTROP.Csp11.Scaffold555.g3743
OG0001930	CKAMA.g442	CBRIG.CBG08020	CELEG.Y48G10A.1	CTROP.Csp11.Scaffold629.g9620
OG0001933	CKAMA.g18500	CBRIG.CBG21197	CELEG.Y76A2A.2	CTROP.Csp11.Scaffold84.g528
OG0001937	CKAMA.g18300	CBRIG.CBG09356	CELEG.M03E7.2	CTROP.Csp11.Scaffold536.g3314
OG0001942	CKAMA.g18456	CBRIG.CBG00374	CELEG.T28F3.8	CTROP.Csp11.Scaffold171.g662
OG0001956	CKAMA.g18929	CBRIG.CBG02586	CELEG.F40H3.1	CTROP.Csp11.Scaffold629.g16451
OG0001980	CKAMA.g2909	CBRIG.CBG13942	CELEG.F38A1.8	CTROP.Csp11.Scaffold630.g20845
OG0001989	CKAMA.g3116	CBRIG.CBG14389	CELEG.C52B9.7	CTROP.Csp11.Scaffold622.g6215
OG0002017	CKAMA.g13202	CBRIG.CBG04201	CELEG.M01B12.3	CTROP.Csp11.Scaffold627.g6903
OG0002041	CKAMA.g4521	CBRIG.CBG09087	CELEG.R12B2.4	CTROP.Csp11.Scaffold444.g1238
OG0002060	CKAMA.g13935	CBRIG.CBG16600	CELEG.B0280.13	CTROP.Csp11.Scaffold36.g158
OG0002069	CKAMA.g14075	CBRIG.CBG16872	CELEG.C34D10.2	CTROP.Csp11.Scaffold630.g18899
OG0002078	CKAMA.g7931	CBRIG.CBG19289	CELEG.F11A3.1	CTROP.Csp11.Scaffold629.g15738
OG0002087	CKAMA.g5626	CBRIG.CBG11493	CELEG.F20G2.2	CTROP.Csp11.Scaffold629.g14110
OG0002094	CKAMA.g5878	CBRIG.CBG02311	CELEG.C27A2.1	CTROP.Csp11.Scaffold599.g5366
OG0002096	CKAMA.g5994	CBRIG.CBG00623	CELEG.M05D6.2	CTROP.Csp11.Scaffold630.g21323
OG0002103	CKAMA.g6225	CBRIG.CBG20552	CELEG.F40A3.3	CTROP.Csp11.Scaffold629.g14288
OG0002114	CKAMA.g15297	CBRIG.CBG12933	CELEG.Y113G7A.9	CTROP.Csp11.Scaffold75.g457
OG0002120	CKAMA.g7220	CBRIG.CBG06434	CELEG.Y108G3AL.1	CTROP.Csp11.Scaffold629.g7594
OG0002142	CKAMA.g7714	CBRIG.CBG13450	CELEG.M03A1.7	CTROP.Csp11.Scaffold629.g15082
OG0002281	CKAMA.g7993	CBRIG.CBG00515	CELEG.D2085.1	CTROP.Csp11.Scaffold629.g15074
OG0002289	CKAMA.g8064	CBRIG.CBG03294	CELEG.ZK675.1	CTROP.Csp11.Scaffold531.g3170
OG0002290	CKAMA.g8071	CBRIG.CBG03306	CELEG.T09A5.8	CTROP.Csp11.Scaffold531.g3159
OG0002297	CKAMA.g8099	CBRIG.CBG03190	CELEG.F46C5.2	CTROP.Csp11.Scaffold630.g20687
OG0002298	CKAMA.g5728	CBRIG.CBG06072	CELEG.B0035.5	CTROP.Csp11.Scaffold629.g8067
OG0002306	CKAMA.g1156	CBRIG.CBG14085	CELEG.F53B1.4	CTROP.Csp11.Scaffold629.g16565
OG0002312	CKAMA.g1277	CBRIG.CBG17302	CELEG.C35C5.4	CTROP.Csp11.Scaffold553.g3669
OG0002316	CKAMA.g1301	CBRIG.CBG17361	CELEG.ZK455.1	CTROP.Csp11.Scaffold31.g129
OG0002323	CKAMA.g1376	CBRIG.CBG17560	CELEG.F47B10.2	CTROP.Csp11.Scaffold629.g13827
OG0002324	CKAMA.g1400	CBRIG.CBG04526	CELEG.T01C1.4	CTROP.Csp11.Scaffold629.g13790
OG0002325	CKAMA.g1413	CBRIG.CBG30810	CELEG.F59F5.7	CTROP.Csp11.Scaffold629.g13770
OG0002327	CKAMA.g4377	CBRIG.CBG01737	CELEG.T22B11.5	CTROP.Csp11.Scaffold589.g4994
OG0002328	CKAMA.g11888	CBRIG.CBG00973	CELEG.R53.1	CTROP.Csp11.Scaffold630.g17963
OG0002329	CKAMA.g15950	CBRIG.CBG20283	CELEG.T27A3.2	CTROP.Csp11.Scaffold595.g5233
OG0002343	CKAMA.g8281	CBRIG.CBG22063	CELEG.Y48G1A.5	CTROP.Csp11.Scaffold629.g15188
OG0002347	CKAMA.g8300	CBRIG.CBG05103	CELEG.F56C11.1	CTROP.Csp11.Scaffold629.g12845
OG0002348	CKAMA.g8307	CBRIG.CBG22019	CELEG.C53D5.2	CTROP.Csp11.Scaffold629.g14569
OG0002355	CKAMA.g15975	CBRIG.CBG05595	CELEG.B0250.5	CTROP.Csp11.Scaffold630.g21891
OG0002358	CKAMA.g8340	CBRIG.CBG21964	CELEG.F31D5.2	CTROP.Csp11.Scaffold629.g13188
OG0002374	CKAMA.g8729	CBRIG.CBG14916	CELEG.T19B4.3	CTROP.Csp11.Scaffold629.g15171
OG0002385	CKAMA.g8550	CBRIG.CBG21513	CELEG.Y57G11C.11	CTROP.Csp11.Scaffold630.g21260
OG0002397	CKAMA.g1070	CBRIG.CBG08656	CELEG.K11D12.9	CTROP.Csp11.Scaffold629.g13137
OG0002404	CKAMA.g232	CBRIG.CBG04612	CELEG.F23B12.5	CTROP.Csp11.Scaffold630.g19833
OG0002406	CKAMA.g1896	CBRIG.CBG13148	CELEG.F43E2.5	CTROP.Csp11.Scaffold455.g1351
OG0002408	CKAMA.g16126	CBRIG.CBG23950	CELEG.K07D4.3	CTROP.Csp11.Scaffold500.g2283
OG0002410	CKAMA.g8649	CBRIG.CBG18191	CELEG.C26E6.11	CTROP.Csp11.Scaffold629.g14365
OG0002411	CKAMA.g8657	CBRIG.CBG18202	CELEG.C27F2.4	CTROP.Csp11.Scaffold629.g14376
OG0002413	CKAMA.g1482	CBRIG.CBG23008	CELEG.F54D8.3	CTROP.Csp11.Scaffold629.g14493
OG0002415	CKAMA.g18701	CBRIG.CBG17650	CELEG.T25B9.1	CTROP.Csp11.Scaffold629.g15045
OG0002417	CKAMA.g8711	CBRIG.CBG14895	CELEG.M01E11.1	CTROP.Csp11.Scaffold629.g15132
OG0002418	CKAMA.g8719	CBRIG.CBG02237	CELEG.M01E11.3	CTROP.Csp11.Scaffold617.g6027
OG0002420	CKAMA.g8738	CBRIG.CBG12756	CELEG.K02F2.2	CTROP.Csp11.Scaffold539.g3355
OG0002423	CKAMA.g14857	CBRIG.CBG01259	CELEG.Y5H2B.2	CTROP.Csp11.Scaffold566.g4124
OG0002424	CKAMA.g14291	CBRIG.CBG18715	CELEG.T01E8.3	CTROP.Csp11.Scaffold563.g3990
OG0002434	CKAMA.g8824	CBRIG.CBG03825	CELEG.T24D1.4	CTROP.Csp11.Scaffold629.g10914
OG0002436	CKAMA.g8833	CBRIG.CBG12513	CELEG.R05D11.1	CTROP.Csp11.Scaffold630.g20446
OG0002445	CKAMA.g8906	CBRIG.CBG12629	CELEG.T23H2.1	CTROP.Csp11.Scaffold630.g20344
OG0002459	CKAMA.g9014	CBRIG.CBG18293	CELEG.C44B9.4	CTROP.Csp11.Scaffold628.g7274
OG0002461	CKAMA.g9296	CBRIG.CBG07110	CELEG.F56D12.1	CTROP.Csp11.Scaffold605.g5682
OG0002467	CKAMA.g9098	CBRIG.CBG02670	CELEG.T28D9.3	CTROP.Csp11.Scaffold629.g11563
OG0002472	CKAMA.g7736	CBRIG.CBG11570	CELEG.C01G10.7	CTROP.Csp11.Scaffold629.g15837
OG0002474	CKAMA.g1518	CBRIG.CBG02746	CELEG.K12D12.1	CTROP.Csp11.Scaffold629.g7891
OG0002475	CKAMA.g9132	CBRIG.CBG17840	CELEG.T20F7.1	CTROP.Csp11.Scaffold464.g1563
OG0002479	CKAMA.g9179	CBRIG.CBG01900	CELEG.F47A4.2	CTROP.Csp11.Scaffold629.g13606
OG0002487	CKAMA.g9293	CBRIG.CBG07177	CELEG.F54D12.6	CTROP.Csp11.Scaffold629.g9011
OG0002490	CKAMA.g9311	CBRIG.CBG16813	CELEG.Y38F2AR.12	CTROP.Csp11.Scaffold629.g10758
OG0002491	CKAMA.g9332	CBRIG.CBG19201	CELEG.F21C10.3	CTROP.Csp11.Scaffold630.g16848
OG0002493	CKAMA.g9342	CBRIG.CBG19077	CELEG.VC5.4	CTROP.Csp11.Scaffold629.g8921
OG0002496	CKAMA.g3916	CBRIG.CBG19579	CELEG.F08D12.7	CTROP.Csp11.Scaffold629.g14609
OG0002499	CKAMA.g4917	CBRIG.CBG16488	CELEG.F57B9.1	CTROP.Csp11.Scaffold629.g14426
OG0002500	CKAMA.g9450	CBRIG.CBG12289	CELEG.ZK688.8	CTROP.Csp11.Scaffold629.g12589
OG0002503	CKAMA.g16439	CBRIG.CBG13943	CELEG.Y77E11A.6	CTROP.Csp11.Scaffold630.g20866
OG0002515	CKAMA.g9518	CBRIG.CBG03766	CELEG.T05F1.13	CTROP.Csp11.Scaffold629.g14666
OG0002521	CKAMA.g13349	CBRIG.CBG12255	CELEG.ZK652.10	CTROP.Csp11.Scaffold630.g17223
OG0002528	CKAMA.g14572	CBRIG.CBG03001	CELEG.M106.4	CTROP.Csp11.Scaffold618.g6059
OG0002529	CKAMA.g9599	CBRIG.CBG07685	CELEG.Y15E3A.4	CTROP.Csp11.Scaffold558.g3820
OG0002535	CKAMA.g11042	CBRIG.CBG20369	CELEG.W08E3.3	CTROP.Csp11.Scaffold630.g17857
OG0002537	CKAMA.g12679	CBRIG.CBG03543	CELEG.K10D2.6	CTROP.Csp11.Scaffold629.g12518
OG0002538	CKAMA.g1600	CBRIG.CBG08277	CELEG.D2005.2	CTROP.Csp11.Scaffold551.g3633
OG0002541	CKAMA.g9718	CBRIG.CBG24274	CELEG.C09E8.3	CTROP.Csp11.Scaffold605.g5636
OG0002542	CKAMA.g1950	CBRIG.CBG24741	CELEG.T02G5.8	CTROP.Csp11.Scaffold629.g12166
OG0002545	CKAMA.g4869	CBRIG.CBG20783	CELEG.Y48C3A.18	CTROP.Csp11.Scaffold630.g19468
OG0002547	CKAMA.g9753	CBRIG.CBG22025	CELEG.C12C8.2	CTROP.Csp11.Scaffold629.g15199
OG0002552	CKAMA.g9762	CBRIG.CBG16933	CELEG.F36H2.1	CTROP.Csp11.Scaffold629.g8127
OG0002553	CKAMA.g9770	CBRIG.CBG19475	CELEG.F26H9.4	CTROP.Csp11.Scaffold629.g15209
OG0002559	CKAMA.g1639	CBRIG.CBG05874	CELEG.F13B6.1	CTROP.Csp11.Scaffold630.g21167
OG0002563	CKAMA.g10022	CBRIG.CBG12320	CELEG.F55A12.9	CTROP.Csp11.Scaffold630.g20494
OG0002564	CKAMA.g9821	CBRIG.CBG09203	CELEG.C14B1.1	CTROP.Csp11.Scaffold629.g9518
OG0002565	CKAMA.g9827	CBRIG.CBG23901	CELEG.Y55F3BR.4	CTROP.Csp11.Scaffold630.g20798
OG0002568	CKAMA.g6442	CBRIG.CBG16187	CELEG.C35B8.3	CTROP.Csp11.Scaffold629.g13405
OG0002571	CKAMA.g9888	CBRIG.CBG16141	CELEG.B0272.4	CTROP.Csp11.Scaffold629.g13446
OG0002572	CKAMA.g9889	CBRIG.CBG16139	CELEG.B0272.3	CTROP.Csp11.Scaffold629.g13444
OG0002573	CKAMA.g9913	CBRIG.CBG16083	CELEG.F49E2.2	CTROP.Csp11.Scaffold629.g13467
OG0002576	CKAMA.g16701	CBRIG.CBG03603	CELEG.ZK1058.1	CTROP.Csp11.Scaffold629.g15098
OG0002581	CKAMA.g9998	CBRIG.CBG01603	CELEG.K11H12.7	CTROP.Csp11.Scaffold629.g7561
OG0002583	CKAMA.g1092	CBRIG.CBG23365	CELEG.R07B7.1	CTROP.Csp11.Scaffold629.g10350
OG0002586	CKAMA.g10020	CBRIG.CBG12314	CELEG.C24A11.9	CTROP.Csp11.Scaffold630.g20490
OG0002588	CKAMA.g10027	CBRIG.CBG12325	CELEG.F55A12.4	CTROP.Csp11.Scaffold630.g20499
OG0002590	CKAMA.g10072	CBRIG.CBG12371	CELEG.F36A2.2	CTROP.Csp11.Scaffold630.g20542
OG0002594	CKAMA.g10108	CBRIG.CBG23346	CELEG.C52E4.4	CTROP.Csp11.Scaffold629.g7749
OG0002598	CKAMA.g1767	CBRIG.CBG00938	CELEG.W07A12.7	CTROP.Csp11.Scaffold562.g3913
OG0002599	CKAMA.g1779	CBRIG.CBG20231	CELEG.D2013.2	CTROP.Csp11.Scaffold562.g3941
OG0002601	CKAMA.g1804	CBRIG.CBG13347	CELEG.C08B11.9	CTROP.Csp11.Scaffold629.g10280
OG0002604	CKAMA.g1865	CBRIG.CBG00674	CELEG.K01C8.10	CTROP.Csp11.Scaffold629.g8242
OG0002605	CKAMA.g1892	CBRIG.CBG13152	CELEG.F43E2.1	CTROP.Csp11.Scaffold455.g1346
OG0002607	CKAMA.g1900	CBRIG.CBG13142	CELEG.F21D12.1	CTROP.Csp11.Scaffold526.g3081
OG0002610	CKAMA.g1930	CBRIG.CBG13089	CELEG.E04F6.3	CTROP.Csp11.Scaffold485.g1946
OG0002613	CKAMA.g1972	CBRIG.CBG11191	CELEG.F22D3.6	CTROP.Csp11.Scaffold629.g12118
OG0002615	CKAMA.g6078	CBRIG.CBG01054	CELEG.ZK1320.9	CTROP.Csp11.Scaffold629.g8847
OG0002619	CKAMA.g10191	CBRIG.CBG16000	CELEG.F53H4.4	CTROP.Csp11.Scaffold629.g13497
OG0002620	CKAMA.g1973	CBRIG.CBG16224	CELEG.T01H10.8	CTROP.Csp11.Scaffold629.g13229
OG0002624	CKAMA.g1987	CBRIG.CBG08717	CELEG.H28O16.1	CTROP.Csp11.Scaffold574.g4337
OG0002628	CKAMA.g3960	CBRIG.CBG23406	CELEG.ZK836.2	CTROP.Csp11.Scaffold629.g10391
OG0002633	CKAMA.g5093	CBRIG.CBG18146	CELEG.ZK353.7	CTROP.Csp11.Scaffold571.g4281
OG0002641	CKAMA.g12075	CBRIG.CBG04003	CELEG.C41D11.2	CTROP.Csp11.Scaffold630.g17109
OG0002642	CKAMA.g18689	CBRIG.CBG17616	CELEG.T11G6.1	CTROP.Csp11.Scaffold630.g17690
OG0002647	CKAMA.g5611	CBRIG.CBG11511	CELEG.F58G11.1	CTROP.Csp11.Scaffold629.g14126
OG0002648	CKAMA.g11050	CBRIG.CBG21175	CELEG.C34E10.7	CTROP.Csp11.Scaffold629.g12529
OG0002649	CKAMA.g10588	CBRIG.CBG14997	CELEG.C28D4.1	CTROP.Csp11.Scaffold629.g12361
OG0002651	CKAMA.g16914	CBRIG.CBG16678	CELEG.F53H1.1	CTROP.Csp11.Scaffold630.g20901
OG0002655	CKAMA.g10657	CBRIG.CBG13501	CELEG.K02D7.1	CTROP.Csp11.Scaffold629.g10688
OG0002666	CKAMA.g5150	CBRIG.CBG18562	CELEG.Y75B12B.6	CTROP.Csp11.Scaffold629.g9574
OG0002669	CKAMA.g19048	CBRIG.CBG01477	CELEG.F41E6.5	CTROP.Csp11.Scaffold541.g3387
OG0002670	CKAMA.g10805	CBRIG.CBG15345	CELEG.ZK370.3	CTROP.Csp11.Scaffold629.g9852
OG0002672	CKAMA.g10846	CBRIG.CBG09668	CELEG.F29F11.1	CTROP.Csp11.Scaffold629.g15538
OG0002674	CKAMA.g10873	CBRIG.CBG00074	CELEG.T22H6.2	CTROP.Csp11.Scaffold630.g18816
OG0002676	CKAMA.g10886	CBRIG.CBG21184	CELEG.C34E10.8	CTROP.Csp11.Scaffold629.g12539
OG0002680	CKAMA.g6953	CBRIG.CBG03613	CELEG.C36A4.9	CTROP.Csp11.Scaffold603.g5500
OG0002682	CKAMA.g10982	CBRIG.CBG03047	CELEG.C14A4.9	CTROP.Csp11.Scaffold629.g8894
OG0002684	CKAMA.g10991	CBRIG.CBG03060	CELEG.C14A4.4	CTROP.Csp11.Scaffold629.g8942
OG0002687	CKAMA.g11013	CBRIG.CBG23394	CELEG.C27A7.5	CTROP.Csp11.Scaffold629.g10376
OG0002689	CKAMA.g5183	CBRIG.CBG10154	CELEG.T23G5.1	CTROP.Csp11.Scaffold630.g18418
OG0002690	CKAMA.g18573	CBRIG.CBG21657	CELEG.F59B8.2	CTROP.Csp11.Scaffold629.g8186
OG0002707	CKAMA.g2326	CBRIG.CBG05980	CELEG.F13H10.3	CTROP.Csp11.Scaffold629.g8006
OG0002709	CKAMA.g11134	CBRIG.CBG21676	CELEG.T04A11.6	CTROP.Csp11.Scaffold451.g1321
OG0002710	CKAMA.g11145	CBRIG.CBG07079	CELEG.Y51H7BR.4	CTROP.Csp11.Scaffold605.g5657
OG0002711	CKAMA.g13414	CBRIG.CBG08495	CELEG.Y48G8AL.11	CTROP.Csp11.Scaffold629.g16065
OG0002718	CKAMA.g2317	CBRIG.CBG05963	CELEG.ZK593.8	CTROP.Csp11.Scaffold629.g7993
OG0002722	CKAMA.g2338	CBRIG.CBG06001	CELEG.M7.5	CTROP.Csp11.Scaffold629.g8021
OG0002727	CKAMA.g2362	CBRIG.CBG06822	CELEG.R107.4	CTROP.Csp11.Scaffold629.g15119
OG0002731	CKAMA.g14706	CBRIG.CBG12225	CELEG.C25A1.7	CTROP.Csp11.Scaffold629.g11633
OG0002732	CKAMA.g2505	CBRIG.CBG05636	CELEG.W01F3.3	CTROP.Csp11.Scaffold630.g21826
OG0002741	CKAMA.g249	CBRIG.CBG04579	CELEG.R11H6.1	CTROP.Csp11.Scaffold630.g19861
OG0002745	CKAMA.g11319	CBRIG.CBG19343	CELEG.ZK287.6	CTROP.Csp11.Scaffold630.g17632
OG0002746	CKAMA.g11322	CBRIG.CBG19349	CELEG.F40F9.1	CTROP.Csp11.Scaffold630.g17636
OG0002749	CKAMA.g11343	CBRIG.CBG04789	CELEG.K06B4.11	CTROP.Csp11.Scaffold630.g20047
OG0002751	CKAMA.g4552	CBRIG.CBG09036	CELEG.F25B5.5	CTROP.Csp11.Scaffold553.g3684
OG0002753	CKAMA.g11378	CBRIG.CBG30296	CELEG.R144.12	CTROP.Csp11.Scaffold629.g14390
OG0002754	CKAMA.g11383	CBRIG.CBG16521	CELEG.R144.2	CTROP.Csp11.Scaffold629.g14396
OG0002755	CKAMA.g14748	CBRIG.CBG08395	CELEG.Y41D4A.6	CTROP.Csp11.Scaffold629.g10582
OG0002756	CKAMA.g7377	CBRIG.CBG15299	CELEG.F08F8.7	CTROP.Csp11.Scaffold505.g2408
OG0002771	CKAMA.g11610	CBRIG.CBG20937	CELEG.Y57A10B.1	CTROP.Csp11.Scaffold602.g5475
OG0002776	CKAMA.g3387	CBRIG.CBG10981	CELEG.C54D1.4	CTROP.Csp11.Scaffold578.g4497
OG0002783	CKAMA.g381	CBRIG.CBG03435	CELEG.C47E12.1	CTROP.Csp11.Scaffold585.g4817
OG0002788	CKAMA.g2470	CBRIG.CBG09579	CELEG.B0024.8	CTROP.Csp11.Scaffold516.g2703
OG0002789	CKAMA.g11706	CBRIG.CBG00232	CELEG.C24A3.4	CTROP.Csp11.Scaffold601.g5416
OG0002791	CKAMA.g5708	CBRIG.CBG19372	CELEG.F46B6.4	CTROP.Csp11.Scaffold630.g17656
OG0002815	CKAMA.g18974	CBRIG.CBG03789	CELEG.F10G8.9	CTROP.Csp11.Scaffold629.g10886
OG0002816	CKAMA.g2590	CBRIG.CBG23262	CELEG.D2023.2	CTROP.Csp11.Scaffold629.g7794
OG0002817	CKAMA.g11900	CBRIG.CBG10339	CELEG.Y38E10A.22	CTROP.Csp11.Scaffold629.g14954
OG0002818	CKAMA.g6617	CBRIG.CBG06032	CELEG.R07H5.8	CTROP.Csp11.Scaffold629.g8051
OG0002823	CKAMA.g11958	CBRIG.CBG00370	CELEG.ZK550.6	CTROP.Csp11.Scaffold171.g660
OG0002825	CKAMA.g11960	CBRIG.CBG30412	CELEG.ZK550.4	CTROP.Csp11.Scaffold171.g658
OG0002830	CKAMA.g4284	CBRIG.CBG16436	CELEG.F21D5.7	CTROP.Csp11.Scaffold629.g10438
OG0002832	CKAMA.g6241	CBRIG.CBG08841	CELEG.C37H5.13	CTROP.Csp11.Scaffold630.g21586
OG0002833	CKAMA.g3664	CBRIG.CBG19254	CELEG.K07B1.2	CTROP.Csp11.Scaffold630.g20602
OG0002836	CKAMA.g320	CBRIG.CBG19762	CELEG.F39B2.7	CTROP.Csp11.Scaffold630.g20964
OG0002844	CKAMA.g4584	CBRIG.CBG19676	CELEG.C05D11.12	CTROP.Csp11.Scaffold630.g17491
OG0002851	CKAMA.g6451	CBRIG.CBG19040	CELEG.K11C4.4	CTROP.Csp11.Scaffold556.g3751
OG0002855	CKAMA.g843	CBRIG.CBG15212	CELEG.F20H11.2	CTROP.Csp11.Scaffold630.g17924
OG0002856	CKAMA.g7861	CBRIG.CBG15935	CELEG.F10D7.3	CTROP.Csp11.Scaffold629.g13558
OG0002858	CKAMA.g17970	CBRIG.CBG19309	CELEG.F25B3.3	CTROP.Csp11.Scaffold408.g934
OG0002861	CKAMA.g18698	CBRIG.CBG17632	CELEG.T25B9.9	CTROP.Csp11.Scaffold630.g17673
OG0002865	CKAMA.g18360	CBRIG.CBG05180	CELEG.F48E8.6	CTROP.Csp11.Scaffold628.g7460
OG0002867	CKAMA.g388	CBRIG.CBG03446	CELEG.T13H10.2	CTROP.Csp11.Scaffold585.g4828
OG0002875	CKAMA.g18079	CBRIG.CBG02932	CELEG.T24F1.1	CTROP.Csp11.Scaffold45.g263
OG0002876	CKAMA.g737	CBRIG.CBG24607	CELEG.T07C4.7	CTROP.Csp11.Scaffold628.g7398
OG0002883	CKAMA.g12383	CBRIG.CBG12728	CELEG.F02E9.10	CTROP.Csp11.Scaffold555.g3741
OG0002889	CKAMA.g6377	CBRIG.CBG09642	CELEG.F32G8.6	CTROP.Csp11.Scaffold629.g15525
OG0002892	CKAMA.g12663	CBRIG.CBG22922	CELEG.F22B7.6	CTROP.Csp11.Scaffold630.g18551
OG0002899	CKAMA.g2990	CBRIG.CBG12821	CELEG.B0205.6	CTROP.Csp11.Scaffold629.g8996
OG0002908	CKAMA.g18289	CBRIG.CBG18445	CELEG.K10G6.4	CTROP.Csp11.Scaffold629.g13178
OG0002917	CKAMA.g18403	CBRIG.CBG11970	CELEG.T03F1.7	CTROP.Csp11.Scaffold627.g6777
OG0002923	CKAMA.g18477	CBRIG.CBG19887	CELEG.T19E7.2	CTROP.Csp11.Scaffold510.g2527
OG0002928	CKAMA.g18525	CBRIG.CBG11926	CELEG.F07A5.3	CTROP.Csp11.Scaffold630.g17302
OG0002931	CKAMA.g18551	CBRIG.CBG21919	CELEG.F30A10.2	CTROP.Csp11.Scaffold629.g9971
OG0002933	CKAMA.g18563	CBRIG.CBG21936	CELEG.M05B5.6	CTROP.Csp11.Scaffold629.g9967
OG0002935	CKAMA.g18591	CBRIG.CBG24054	CELEG.C33D9.1	CTROP.Csp11.Scaffold630.g19278
OG0002936	CKAMA.g18616	CBRIG.CBG01538	CELEG.C18F3.2	CTROP.Csp11.Scaffold629.g8470
OG0002941	CKAMA.g18676	CBRIG.CBG17658	CELEG.C50F7.10	CTROP.Csp11.Scaffold23.g97
OG0002943	CKAMA.g18726	CBRIG.CBG04436	CELEG.R09H10.3	CTROP.Csp11.Scaffold630.g17732
OG0002951	CKAMA.g18823	CBRIG.CBG06493	CELEG.C17E7.4	CTROP.Csp11.Scaffold629.g12964
OG0002961	CKAMA.g18973	CBRIG.CBG03788	CELEG.F10G8.6	CTROP.Csp11.Scaffold629.g10887
OG0002964	CKAMA.g18983	CBRIG.CBG03796	CELEG.F26E4.9	CTROP.Csp11.Scaffold629.g15333
OG0002966	CKAMA.g19017	CBRIG.CBG05716	CELEG.T22D1.9	CTROP.Csp11.Scaffold624.g6319
OG0002967	CKAMA.g19032	CBRIG.CBG04194	CELEG.Y54E10BR.5	CTROP.Csp11.Scaffold627.g6909
OG0002969	CKAMA.g19061	CBRIG.CBG01514	CELEG.F45F2.9	CTROP.Csp11.Scaffold629.g14821
OG0002973	CKAMA.g19107	CBRIG.CBG03614	CELEG.C36A4.8	CTROP.Csp11.Scaffold603.g5501
OG0002979	CKAMA.g19205	CBRIG.CBG24230	CELEG.D1069.1	CTROP.Csp11.Scaffold605.g5603
OG0002982	CKAMA.g2691	CBRIG.CBG04017	CELEG.F33D11.11	CTROP.Csp11.Scaffold630.g17097
OG0002984	CKAMA.g2702	CBRIG.CBG04030	CELEG.B0207.4	CTROP.Csp11.Scaffold630.g17083
OG0002988	CKAMA.g12603	CBRIG.CBG21324	CELEG.T10F2.4	CTROP.Csp11.Scaffold629.g12522
OG0002991	CKAMA.g2824	CBRIG.CBG06629	CELEG.ZK1005.1	CTROP.Csp11.Scaffold629.g7688
OG0003000	CKAMA.g2915	CBRIG.CBG12451	CELEG.ZK858.4	CTROP.Csp11.Scaffold501.g2305
OG0003001	CKAMA.g2975	CBRIG.CBG03934	CELEG.C30F12.2	CTROP.Csp11.Scaffold591.g5138
OG0003003	CKAMA.g2997	CBRIG.CBG12810	CELEG.C34B2.9	CTROP.Csp11.Scaffold629.g9022
OG0003005	CKAMA.g3006	CBRIG.CBG15846	CELEG.Y47H9C.5	CTROP.Csp11.Scaffold629.g11741
OG0003013	CKAMA.g3140	CBRIG.CBG14478	CELEG.F46H6.2	CTROP.Csp11.Scaffold622.g6255
OG0003022	CKAMA.g3282	CBRIG.CBG16888	CELEG.C18A11.7	CTROP.Csp11.Scaffold630.g18880
OG0003030	CKAMA.g3532	CBRIG.CBG14838	CELEG.C15H9.1	CTROP.Csp11.Scaffold626.g6511
OG0003037	CKAMA.g12753	CBRIG.CBG00965	CELEG.T15H9.7	CTROP.Csp11.Scaffold50.g316
OG0003040	CKAMA.g12817	CBRIG.CBG18010	CELEG.T04A8.7	CTROP.Csp11.Scaffold478.g1780
OG0003047	CKAMA.g3703	CBRIG.CBG12133	CELEG.T08B1.6	CTROP.Csp11.Scaffold629.g13038
OG0003048	CKAMA.g3710	CBRIG.CBG21814	CELEG.T10B5.6	CTROP.Csp11.Scaffold629.g13082
OG0003058	CKAMA.g3762	CBRIG.CBG19788	CELEG.Y105E8A.26	CTROP.Csp11.Scaffold630.g19021
OG0003061	CKAMA.g13339	CBRIG.CBG24933	CELEG.Y39B6A.3	CTROP.Csp11.Scaffold621.g6180
OG0003065	CKAMA.g13006	CBRIG.CBG18356	CELEG.Y45F3A.3	CTROP.Csp11.Scaffold628.g7345
OG0003069	CKAMA.g13070	CBRIG.CBG12028	CELEG.D1037.2	CTROP.Csp11.Scaffold627.g6724
OG0003073	CKAMA.g3885	CBRIG.CBG21354	CELEG.W10G11.16	CTROP.Csp11.Scaffold630.g16902
OG0003078	CKAMA.g3912	CBRIG.CBG19572	CELEG.F29A7.4	CTROP.Csp11.Scaffold629.g14580
OG0003080	CKAMA.g13209	CBRIG.CBG04215	CELEG.Y71F9AM.4	CTROP.Csp11.Scaffold627.g6891
OG0003083	CKAMA.g3935	CBRIG.CBG08368	CELEG.F13B12.4	CTROP.Csp11.Scaffold630.g17775
OG0003085	CKAMA.g3985	CBRIG.CBG01443	CELEG.Y45G5AM.5	CTROP.Csp11.Scaffold629.g12814
OG0003088	CKAMA.g4048	CBRIG.CBG18107	CELEG.C02D5.1	CTROP.Csp11.Scaffold630.g21917
OG0003117	CKAMA.g4325	CBRIG.CBG01813	CELEG.C48D1.2	CTROP.Csp11.Scaffold589.g5074
OG0003120	CKAMA.g4331	CBRIG.CBG01804	CELEG.JC8.5	CTROP.Csp11.Scaffold589.g5062
OG0003122	CKAMA.g4382	CBRIG.CBG01727	CELEG.F29B9.2	CTROP.Csp11.Scaffold589.g4985
OG0003138	CKAMA.g4512	CBRIG.CBG04214	CELEG.H27M09.3	CTROP.Csp11.Scaffold627.g6892
OG0003141	CKAMA.g4529	CBRIG.CBG09066	CELEG.F01F1.10	CTROP.Csp11.Scaffold546.g3473
OG0003143	CKAMA.g4544	CBRIG.CBG09045	CELEG.C28H8.3	CTROP.Csp11.Scaffold546.g3500
OG0003147	CKAMA.g4591	CBRIG.CBG19664	CELEG.C05D11.5	CTROP.Csp11.Scaffold629.g16139
OG0003148	CKAMA.g4593	CBRIG.CBG09115	CELEG.C16A3.10	CTROP.Csp11.Scaffold629.g16141
OG0003149	CKAMA.g13588	CBRIG.CBG02395	CELEG.F07F6.8	CTROP.Csp11.Scaffold629.g11413
OG0003150	CKAMA.g491	CBRIG.CBG23659	CELEG.Y53H1C.1	CTROP.Csp11.Scaffold630.g19142
OG0003152	CKAMA.g13641	CBRIG.CBG23420	CELEG.T04H1.4	CTROP.Csp11.Scaffold629.g10404
OG0003154	CKAMA.g4633	CBRIG.CBG14959	CELEG.Y47G6A.11	CTROP.Csp11.Scaffold627.g6809
OG0003164	CKAMA.g13692	CBRIG.CBG04756	CELEG.H39E23.1	CTROP.Csp11.Scaffold630.g19984
OG0003171	CKAMA.g4699	CBRIG.CBG13536	CELEG.T07A9.3	CTROP.Csp11.Scaffold629.g10698
OG0003172	CKAMA.g13767	CBRIG.CBG11707	CELEG.Y82E9BR.15	CTROP.Csp11.Scaffold528.g3123
OG0003174	CKAMA.g13780	CBRIG.CBG15221	CELEG.Y67D2.6	CTROP.Csp11.Scaffold630.g20288
OG0003179	CKAMA.g13863	CBRIG.CBG05372	CELEG.C17H12.14	CTROP.Csp11.Scaffold630.g17791
OG0003186	CKAMA.g4765	CBRIG.CBG04259	CELEG.Y54E2A.2	CTROP.Csp11.Scaffold630.g20237
OG0003189	CKAMA.g4801	CBRIG.CBG20870	CELEG.F57C2.5	CTROP.Csp11.Scaffold630.g19549
OG0003206	CKAMA.g4954	CBRIG.CBG20206	CELEG.C03C10.1	CTROP.Csp11.Scaffold630.g17511
OG0003212	CKAMA.g14061	CBRIG.CBG14737	CELEG.C41G11.1	CTROP.Csp11.Scaffold626.g6584
OG0003216	CKAMA.g5077	CBRIG.CBG24264	CELEG.C23G10.4	CTROP.Csp11.Scaffold596.g5266
OG0003221	CKAMA.g5160	CBRIG.CBG06936	CELEG.ZK507.6	CTROP.Csp11.Scaffold629.g9754
OG0003222	CKAMA.g5162	CBRIG.CBG06939	CELEG.ZK512.3	CTROP.Csp11.Scaffold611.g5854
OG0003227	CKAMA.g5226	CBRIG.CBG00590	CELEG.ZK637.1	CTROP.Csp11.Scaffold629.g9837
OG0003233	CKAMA.g14204	CBRIG.CBG05791	CELEG.C42D4.6	CTROP.Csp11.Scaffold630.g21113
OG0003240	CKAMA.g14285	CBRIG.CBG19978	CELEG.C02B10.1	CTROP.Csp11.Scaffold630.g20942
OG0003243	CKAMA.g6835	CBRIG.CBG04128	CELEG.Y23H5A.7	CTROP.Csp11.Scaffold627.g6835
OG0003244	CKAMA.g5312	CBRIG.CBG00196	CELEG.F47E1.2	CTROP.Csp11.Scaffold630.g18723
OG0003247	CKAMA.g5360	CBRIG.CBG04321	CELEG.C56C10.7	CTROP.Csp11.Scaffold629.g12034
OG0003256	CKAMA.g14430	CBRIG.CBG12032	CELEG.W02A2.6	CTROP.Csp11.Scaffold627.g6721
OG0003274	CKAMA.g1011	CBRIG.CBG16864	CELEG.F45E1.4	CTROP.Csp11.Scaffold630.g18903
OG0003275	CKAMA.g14505	CBRIG.CBG08489	CELEG.Y48G8AL.13	CTROP.Csp11.Scaffold629.g16073
OG0003277	CKAMA.g5736	CBRIG.CBG11654	CELEG.H06H21.3	CTROP.Csp11.Scaffold629.g15276
OG0003280	CKAMA.g7154	CBRIG.CBG09320	CELEG.F44E7.8	CTROP.Csp11.Scaffold536.g3285
OG0003282	CKAMA.g14571	CBRIG.CBG03002	CELEG.M106.3	CTROP.Csp11.Scaffold618.g6060
OG0003283	CKAMA.g14595	CBRIG.CBG23732	CELEG.F30F8.5	CTROP.Csp11.Scaffold551.g3623
OG0003284	CKAMA.g14605	CBRIG.CBG12518	CELEG.T01H8.5	CTROP.Csp11.Scaffold630.g20443
OG0003293	CKAMA.g14678	CBRIG.CBG06688	CELEG.R11G10.1	CTROP.Csp11.Scaffold282.g736
OG0003297	CKAMA.g5901	CBRIG.CBG03231	CELEG.C18E9.11	CTROP.Csp11.Scaffold630.g20722
OG0003298	CKAMA.g5957	CBRIG.CBG13000	CELEG.F35D2.2	CTROP.Csp11.Scaffold625.g6328
OG0003316	CKAMA.g6165	CBRIG.CBG08672	CELEG.C04F5.3	CTROP.Csp11.Scaffold629.g13123
OG0003317	CKAMA.g6169	CBRIG.CBG08663	CELEG.K11D12.10	CTROP.Csp11.Scaffold629.g13128
OG0003320	CKAMA.g6248	CBRIG.CBG08803	CELEG.F39G3.5	CTROP.Csp11.Scaffold630.g21578
OG0003322	CKAMA.g14754	CBRIG.CBG13567	CELEG.Y41D4B.19	CTROP.Csp11.Scaffold629.g10606
OG0003341	CKAMA.g14807	CBRIG.CBG02814	CELEG.W09H1.5	CTROP.Csp11.Scaffold629.g7832
OG0003353	CKAMA.g6768	CBRIG.CBG07969	CELEG.B0019.1	CTROP.Csp11.Scaffold630.g17389
OG0003359	CKAMA.g6829	CBRIG.CBG09220	CELEG.C25G4.4	CTROP.Csp11.Scaffold552.g3658
OG0003363	CKAMA.g578	CBRIG.CBG29909	CELEG.F36D1.9	CTROP.Csp11.Scaffold630.g19040
OG0003364	CKAMA.g789	CBRIG.CBG12877	CELEG.F56H1.6	CTROP.Csp11.Scaffold58.g371
OG0003372	CKAMA.g15794	CBRIG.CBG18075	CELEG.R07E5.3	CTROP.Csp11.Scaffold8.g20
OG0003373	CKAMA.g6971	CBRIG.CBG12917	CELEG.Y113G7A.4	CTROP.Csp11.Scaffold630.g17412
OG0003379	CKAMA.g7087	CBRIG.CBG23826	CELEG.ZK262.2	CTROP.Csp11.Scaffold612.g5859
OG0003382	CKAMA.g650	CBRIG.CBG09535	CELEG.C51E3.6	CTROP.Csp11.Scaffold630.g21028
OG0003383	CKAMA.g669	CBRIG.CBG30526	CELEG.F32D8.13	CTROP.Csp11.Scaffold629.g11248
OG0003385	CKAMA.g672	CBRIG.CBG09729	CELEG.F32D8.4	CTROP.Csp11.Scaffold629.g11244
OG0003396	CKAMA.g7230	CBRIG.CBG06448	CELEG.Y38C9A.2	CTROP.Csp11.Scaffold630.g21456
OG0003404	CKAMA.g730	CBRIG.CBG24614	CELEG.K10G9.1	CTROP.Csp11.Scaffold628.g7392
OG0003405	CKAMA.g740	CBRIG.CBG24562	CELEG.T07C4.3	CTROP.Csp11.Scaffold628.g7405
OG0003415	CKAMA.g7459	CBRIG.CBG19735	CELEG.F31C3.2	CTROP.Csp11.Scaffold630.g18985
OG0003425	CKAMA.g7552	CBRIG.CBG21338	CELEG.T20F10.1	CTROP.Csp11.Scaffold629.g16088
OG0003429	CKAMA.g795	CBRIG.CBG13331	CELEG.Y56A3A.33	CTROP.Csp11.Scaffold126.g590
OG0003430	CKAMA.g798	CBRIG.CBG13328	CELEG.Y56A3A.29	CTROP.Csp11.Scaffold126.g584
OG0003437	CKAMA.g895	CBRIG.CBG00474	CELEG.Y55D5A.1	CTROP.Csp11.Scaffold629.g16034
OG0003442	CKAMA.g7586	CBRIG.CBG13498	CELEG.C04G2.7	CTROP.Csp11.Scaffold629.g10691
OG0003447	CKAMA.g950	CBRIG.CBG08374	CELEG.F13B12.6	CTROP.Csp11.Scaffold630.g17770
OG0003448	CKAMA.g951	CBRIG.CBG01851	CELEG.C01H6.9	CTROP.Csp11.Scaffold587.g4925
OG0003457	CKAMA.g7785	CBRIG.CBG00447	CELEG.C49C3.10	CTROP.Csp11.Scaffold441.g1171
